# Supplementary material for: Novel biomarkers and prediction model for the pathological complete response to neoadjuvant treatment of triple-negative breast cancer
Source: PubMed Central journal article supplement (PMC7778555; doi:10.7150/jca.52439), 2021-01-01
Supplement: jcav12p0936s1.pdf [file jcav12p0936s1.pdf]

## Supplementary materials

Figure S1. Flow diagram of selection and identification of cohort datasets.

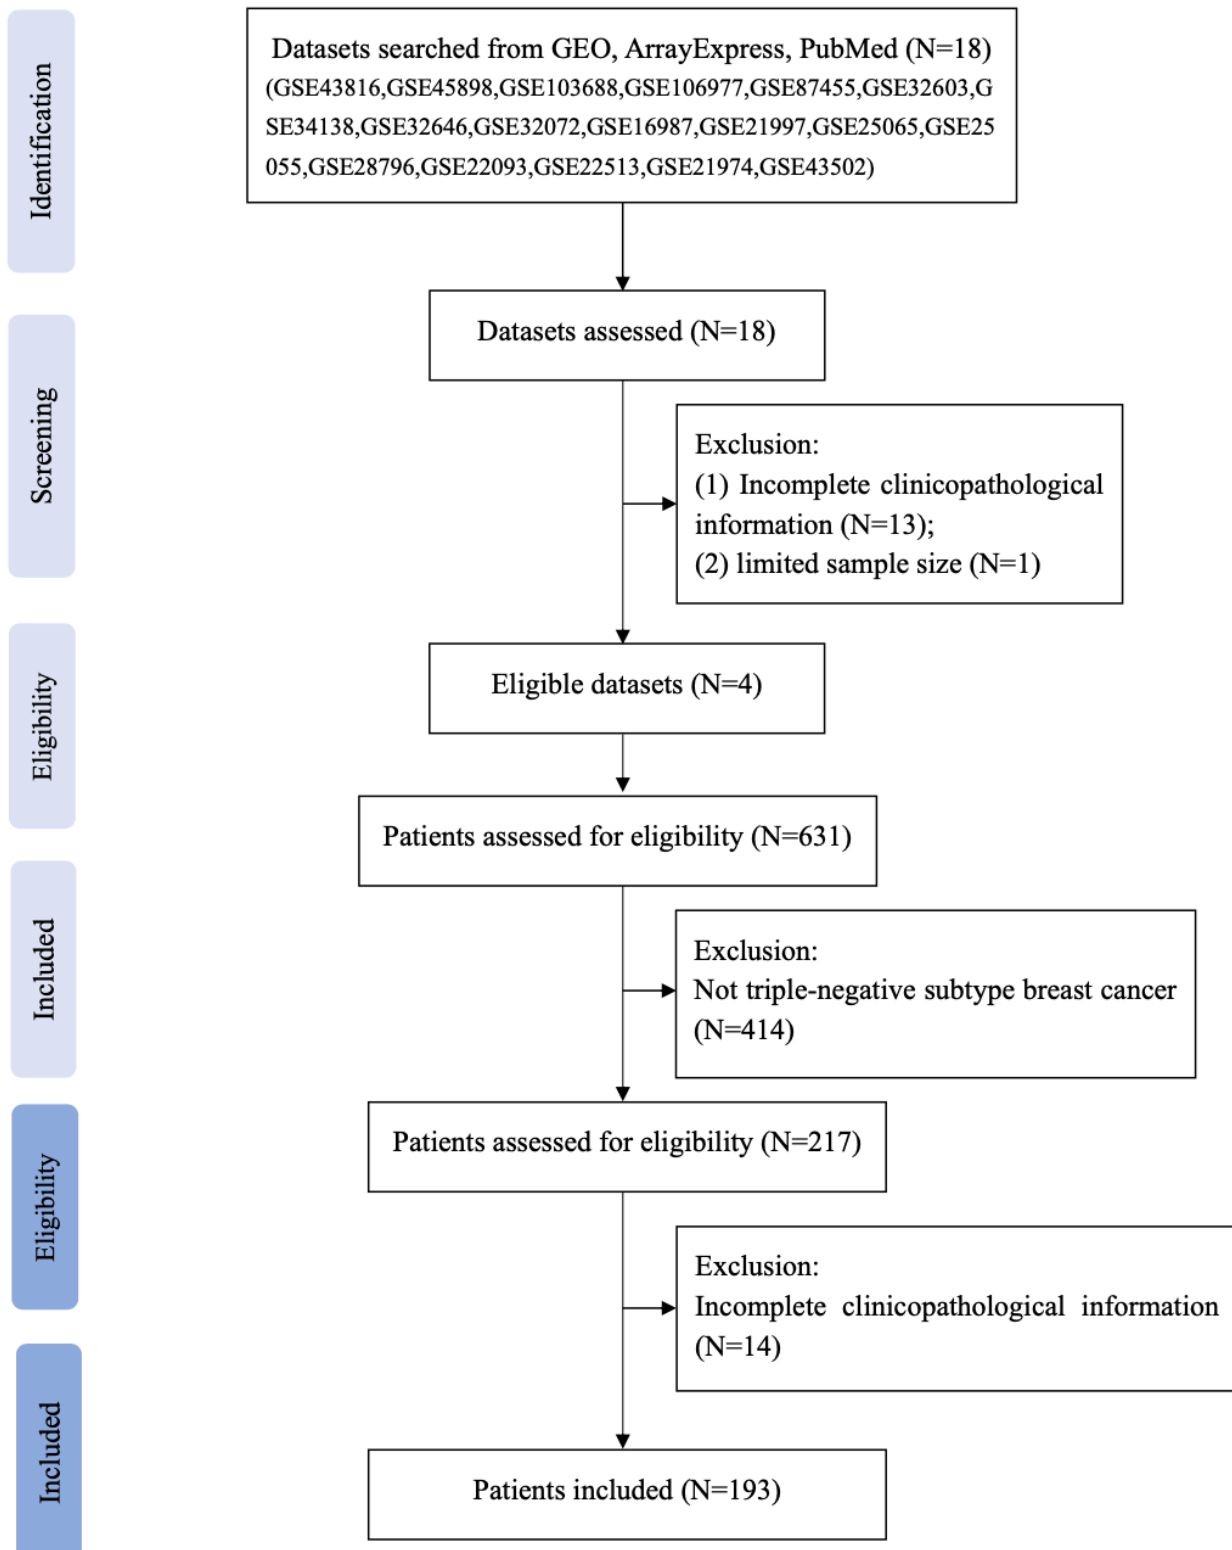

**Table S1. Detailed information of eligible cohort datasets**

| Datasets | Platform                                                  | No. of BC | No. of TNBC |
|----------|-----------------------------------------------------------|-----------|-------------|
| GSE32646 | Affymetrix Human Genome U133 Plus 2.0 Array               | 115       | 26          |
| GSE25065 | Affymetrix Human Genome U133A Array                       | 198       | 67          |
| GSE25055 | Affymetrix Human Genome U133A Array                       | 310       | 120         |
| GSE21974 | Agilent-014850 Whole Human Genome Microarray 4x44K G4112F | 32        | 8           |

**Table S2. Summarized clinicopathological features of included patients**

|                       |                  |
|-----------------------|------------------|
| Age (median, range)   | 49.0 (24.0-75.0) |
| Clinical stage        |                  |
| I                     | 4 (2.1)          |
| IIA                   | 30 (15.5)        |
| IIB                   | 69 (35.8)        |
| IIIA                  | 52 (26.9)        |
| IIIB                  | 29 (15.0)        |
| IIIC                  | 9 (4.7)          |
| T stage               |                  |
| T1                    | 10 (5.2)         |
| T2                    | 98 (50.8)        |
| T3                    | 60 (31.1)        |
| T4                    | 24 (12.4)        |
| Nodal status          |                  |
| Negative              | 46 (23.8)        |
| Positive              | 147 (76.2)       |
| Grade                 |                  |
| Grade1                | 1 (0.5)          |
| Grade2                | 34 (7.6)         |
| Grade3                | 158 (81.9)       |
| Pathological response |                  |
| pCR                   | 71 (36.8)        |
| non-pCR               | 122 (63.2)       |

**Table S3. Detailed information of eligible individuals from adopted cohorts.**

| Sample    | Age | Stage | Grade | T stage | N stage | Response |
|-----------|-----|-------|-------|---------|---------|----------|
| GSM615098 | 41  | IIB   | 3     | 3       | 0       | non-pCR  |
| GSM615101 | 52  | IIIB  | 3     | 4       | 0       | non-pCR  |
| GSM615110 | 50  | IIIA  | 3     | 3       | 1       | pCR      |
| GSM615116 | 54  | IIIA  | 3     | 3       | 1       | non-pCR  |
| GSM615117 | 35  | IIIA  | 3     | 3       | 1       | non-pCR  |
| GSM615124 | 61  | IIIB  | 2     | 4       | 1       | non-pCR  |
| GSM615136 | 60  | IIIA  | 3     | 3       | 1       | non-pCR  |
| GSM615140 | 39  | IIIA  | 2     | 3       | 1       | pCR      |
| GSM615143 | 43  | IIA   | 3     | 2       | 0       | pCR      |
| GSM615145 | 56  | IIIA  | 3     | 3       | 1       | non-pCR  |
| GSM615146 | 39  | IIA   | 3     | 2       | 0       | pCR      |
| GSM615148 | 40  | IIIA  | 3     | 3       | 1       | non-pCR  |
| GSM615149 | 44  | IIIA  | 3     | 3       | 1       | non-pCR  |
| GSM615151 | 45  | IIA   | 2     | 2       | 0       | non-pCR  |
| GSM615152 | 44  | IIIA  | 3     | 2       | 1       | non-pCR  |
| GSM615154 | 41  | IIB   | 3     | 2       | 1       | pCR      |
| GSM615155 | 32  | IIIB  | 3     | 4       | 1       | non-pCR  |
| GSM615156 | 38  | IIB   | 3     | 2       | 1       | non-pCR  |
| GSM615160 | 38  | IIIA  | 3     | 3       | 1       | non-pCR  |
| GSM615164 | 42  | IIB   | 3     | 3       | 0       | pCR      |
| GSM615169 | 48  | IIIA  | 3     | 3       | 1       | non-pCR  |
| GSM615175 | 43  | IIB   | 3     | 3       | 0       | pCR      |
| GSM615178 | 39  | IIB   | 3     | 2       | 1       | non-pCR  |
| GSM615181 | 49  | IIIA  | 3     | 3       | 1       | pCR      |
| GSM615184 | 51  | IIA   | 3     | 2       | 0       | non-pCR  |
| GSM615185 | 65  | I     | 3     | 1       | 0       | non-pCR  |
| GSM615190 | 37  | IIA   | 3     | 2       | 0       | non-pCR  |
| GSM615191 | 37  | I     | 3     | 1       | 0       | pCR      |
| GSM615194 | 61  | IIA   | 3     | 1       | 1       | pCR      |
| GSM615195 | 29  | IIIB  | 3     | 4       | 1       | non-pCR  |
| GSM615202 | 42  | IIB   | 3     | 2       | 1       | pCR      |
| GSM615209 | 56  | IIIC  | 3     | 2       | 1       | pCR      |
| GSM615211 | 35  | IIB   | 3     | 2       | 1       | pCR      |
| GSM615212 | 48  | IIA   | 3     | 2       | 0       | pCR      |
| GSM615213 | 53  | IIIA  | 3     | 3       | 1       | pCR      |
| GSM615218 | 56  | IIIB  | 3     | 4       | 1       | non-pCR  |
| GSM615219 | 38  | IIIB  | 3     | 4       | 1       | non-pCR  |
| GSM615223 | 57  | IIIA  | 3     | 3       | 1       | non-pCR  |
| GSM615225 | 60  | IIIB  | 3     | 4       | 1       | non-pCR  |
| GSM615240 | 48  | IIB   | 3     | 2       | 1       | pCR      |
| GSM615242 | 46  | IIIA  | 3     | 3       | 1       | pCR      |
| GSM615244 | 51  | IIA   | 3     | 1       | 1       | non-pCR  |
| GSM615248 | 42  | IIIA  | 3     | 3       | 1       | non-pCR  |

|           |    |      |   |   |   |         |
|-----------|----|------|---|---|---|---------|
| GSM615251 | 44 | IIB  | 3 | 2 | 1 | non-pCR |
| GSM615255 | 39 | IIIB | 3 | 4 | 1 | non-pCR |
| GSM615260 | 56 | IIIB | 3 | 0 | 1 | non-pCR |
| GSM615264 | 45 | IIA  | 3 | 2 | 0 | pCR     |
| GSM615270 | 38 | IIIB | 3 | 4 | 1 | pCR     |
| GSM615275 | 60 | IIIB | 2 | 4 | 1 | non-pCR |
| GSM615276 | 52 | IIIA | 3 | 3 | 1 | non-pCR |
| GSM615284 | 50 | IIIB | 3 | 4 | 1 | pCR     |
| GSM615288 | 38 | I    | 3 | 1 | 0 | non-pCR |
| GSM615290 | 66 | IIA  | 2 | 2 | 0 | non-pCR |
| GSM615291 | 59 | IIB  | 3 | 2 | 1 | pCR     |
| GSM615293 | 31 | IIA  | 3 | 2 | 1 | pCR     |
| GSM615297 | 58 | IIB  | 3 | 2 | 1 | non-pCR |
| GSM615300 | 57 | IIIB | 3 | 2 | 1 | pCR     |
| GSM615301 | 62 | IIIB | 3 | 4 | 1 | non-pCR |
| GSM615303 | 68 | IIIB | 3 | 4 | 1 | non-pCR |
| GSM615307 | 32 | IIB  | 3 | 2 | 1 | pCR     |
| GSM615310 | 64 | IIIA | 3 | 2 | 1 | pCR     |
| GSM615312 | 51 | IIIB | 2 | 2 | 1 | non-pCR |
| GSM615315 | 32 | IIIC | 3 | 4 | 1 | non-pCR |
| GSM615317 | 47 | IIIC | 3 | 2 | 1 | non-pCR |
| GSM615319 | 63 | IIIC | 3 | 2 | 1 | non-pCR |
| GSM615320 | 40 | IIIA | 3 | 2 | 1 | non-pCR |
| GSM615321 | 50 | IIB  | 3 | 2 | 1 | non-pCR |
| GSM615322 | 52 | IIIB | 3 | 4 | 1 | non-pCR |
| GSM615324 | 49 | IIA  | 3 | 1 | 1 | pCR     |
| GSM615325 | 43 | IIIC | 3 | 1 | 1 | pCR     |
| GSM615326 | 57 | IIA  | 3 | 2 | 0 | non-pCR |
| GSM615327 | 65 | IIB  | 3 | 3 | 0 | non-pCR |
| GSM615330 | 65 | IIIA | 3 | 3 | 1 | non-pCR |
| GSM615331 | 61 | IIB  | 3 | 2 | 1 | pCR     |
| GSM615333 | 48 | I    | 2 | 1 | 0 | non-pCR |
| GSM615334 | 61 | IIIB | 3 | 3 | 1 | pCR     |
| GSM615335 | 51 | IIB  | 3 | 2 | 1 | non-pCR |
| GSM615336 | 49 | IIB  | 3 | 2 | 1 | pCR     |
| GSM615338 | 57 | IIB  | 3 | 2 | 1 | pCR     |
| GSM615346 | 42 | IIB  | 3 | 2 | 1 | non-pCR |
| GSM615347 | 72 | IIA  | 3 | 2 | 0 | non-pCR |
| GSM615348 | 33 | IIB  | 3 | 3 | 0 | non-pCR |
| GSM615354 | 46 | IIIB | 2 | 2 | 1 | pCR     |
| GSM615357 | 53 | IIB  | 3 | 2 | 1 | pCR     |
| GSM615359 | 51 | IIIB | 3 | 4 | 1 | pCR     |
| GSM615363 | 36 | IIA  | 3 | 2 | 0 | non-pCR |
| GSM615364 | 34 | IIIA | 3 | 2 | 1 | non-pCR |
| GSM615368 | 28 | IIB  | 3 | 2 | 1 | non-pCR |

|           |    |      |   |   |   |         |
|-----------|----|------|---|---|---|---------|
| GSM615369 | 50 | IIIA | 3 | 2 | 1 | non-pCR |
| GSM615371 | 67 | IIB  | 3 | 2 | 1 | pCR     |
| GSM615372 | 39 | IIB  | 3 | 2 | 1 | non-pCR |
| GSM615375 | 75 | IIIA | 3 | 2 | 1 | pCR     |
| GSM615376 | 51 | IIB  | 2 | 2 | 1 | non-pCR |
| GSM615378 | 41 | IIIB | 3 | 2 | 1 | non-pCR |
| GSM615379 | 62 | IIIB | 3 | 4 | 1 | pCR     |
| GSM615380 | 40 | IIIA | 3 | 3 | 1 | non-pCR |
| GSM615382 | 59 | IIA  | 3 | 2 | 0 | non-pCR |
| GSM615384 | 57 | IIIA | 3 | 3 | 1 | non-pCR |
| GSM615385 | 37 | IIIA | 2 | 3 | 1 | non-pCR |
| GSM615387 | 38 | IIB  | 3 | 2 | 1 | non-pCR |
| GSM615390 | 46 | IIIA | 3 | 2 | 1 | non-pCR |
| GSM615392 | 65 | IIIB | 3 | 4 | 1 | non-pCR |
| GSM615393 | 43 | IIIA | 3 | 3 | 1 | pCR     |
| GSM615394 | 62 | IIA  | 3 | 2 | 0 | pCR     |
| GSM615396 | 32 | IIIA | 3 | 3 | 1 | pCR     |
| GSM615397 | 57 | IIB  | 2 | 2 | 1 | pCR     |
| GSM615403 | 50 | IIIB | 2 | 4 | 1 | non-pCR |
| GSM615632 | 42 | IIB  | 3 | 2 | 1 | pCR     |
| GSM615637 | 34 | IIB  | 3 | 3 | 0 | pCR     |
| GSM615638 | 58 | IIB  | 3 | 2 | 1 | non-pCR |
| GSM615639 | 43 | IIIA | 3 | 3 | 1 | pCR     |
| GSM615640 | 49 | IIB  | 3 | 3 | 0 | non-pCR |
| GSM615641 | 40 | IIB  | 3 | 2 | 1 | non-pCR |
| GSM615643 | 65 | IIIA | 2 | 3 | 1 | non-pCR |
| GSM615644 | 50 | IIIA | 3 | 3 | 1 | pCR     |
| GSM615648 | 59 | IIB  | 3 | 3 | 0 | non-pCR |
| GSM615649 | 65 | IIIA | 3 | 3 | 1 | non-pCR |
| GSM615650 | 60 | IIB  | 3 | 3 | 0 | non-pCR |
| GSM615651 | 61 | IIB  | 2 | 2 | 1 | non-pCR |
| GSM615657 | 44 | IIIA | 3 | 3 | 1 | non-pCR |
| GSM615658 | 50 | IIB  | 3 | 2 | 1 | pCR     |
| GSM615660 | 41 | IIIC | 3 | 2 | 1 | pCR     |
| GSM615661 | 62 | IIB  | 3 | 2 | 1 | non-pCR |
| GSM615666 | 67 | IIIA | 3 | 3 | 1 | non-pCR |
| GSM615667 | 56 | IIIA | 3 | 3 | 1 | non-pCR |
| GSM615668 | 40 | IIIA | 3 | 2 | 1 | pCR     |
| GSM615671 | 39 | IIB  | 2 | 3 | 0 | non-pCR |
| GSM615674 | 33 | IIA  | 3 | 1 | 1 | non-pCR |
| GSM615676 | 47 | IIB  | 3 | 2 | 1 | pCR     |
| GSM615677 | 46 | IIIC | 3 | 3 | 1 | pCR     |
| GSM615680 | 48 | IIB  | 3 | 3 | 0 | pCR     |
| GSM615687 | 39 | IIB  | 3 | 3 | 0 | non-pCR |
| GSM615689 | 40 | IIB  | 3 | 3 | 0 | non-pCR |

|           |    |      |   |   |   |         |
|-----------|----|------|---|---|---|---------|
| GSM615691 | 34 | IIB  | 3 | 2 | 1 | non-pCR |
| GSM615694 | 40 | IIB  | 3 | 2 | 1 | pCR     |
| GSM615695 | 72 | IIIA | 3 | 3 | 1 | pCR     |
| GSM615696 | 65 | IIB  | 3 | 2 | 1 | non-pCR |
| GSM615699 | 47 | IIIA | 3 | 3 | 1 | non-pCR |
| GSM615701 | 53 | IIB  | 3 | 2 | 1 | non-pCR |
| GSM615706 | 43 | IIIA | 2 | 3 | 1 | pCR     |
| GSM615707 | 63 | IIA  | 3 | 2 | 0 | non-pCR |
| GSM615712 | 57 | IIB  | 3 | 2 | 1 | non-pCR |
| GSM615714 | 54 | IIB  | 3 | 2 | 1 | non-pCR |
| GSM615715 | 50 | IIA  | 3 | 2 | 0 | non-pCR |
| GSM615716 | 33 | IIIA | 3 | 3 | 1 | non-pCR |
| GSM615727 | 24 | IIIA | 3 | 2 | 1 | pCR     |
| GSM615728 | 45 | IIB  | 3 | 2 | 1 | non-pCR |
| GSM615730 | 47 | IIIB | 3 | 4 | 0 | non-pCR |
| GSM615732 | 24 | IIIA | 3 | 3 | 1 | non-pCR |
| GSM615733 | 64 | IIA  | 3 | 2 | 0 | pCR     |
| GSM615737 | 50 | IIA  | 3 | 2 | 0 | pCR     |
| GSM615739 | 53 | IIB  | 3 | 3 | 0 | non-pCR |
| GSM615741 | 44 | IIA  | 3 | 2 | 0 | non-pCR |
| GSM615742 | 38 | IIIC | 3 | 2 | 1 | pCR     |
| GSM615748 | 60 | IIA  | 3 | 2 | 0 | pCR     |
| GSM615755 | 31 | IIIA | 3 | 3 | 1 | non-pCR |
| GSM615773 | 58 | IIB  | 2 | 2 | 1 | pCR     |
| GSM615776 | 45 | IIIA | 3 | 3 | 1 | non-pCR |
| GSM615786 | 55 | IIIB | 3 | 4 | 1 | non-pCR |
| GSM615787 | 46 | IIIA | 3 | 3 | 1 | non-pCR |
| GSM615794 | 66 | IIIB | 2 | 2 | 1 | non-pCR |
| GSM615798 | 40 | IIIA | 3 | 3 | 1 | pCR     |
| GSM615800 | 40 | IIIB | 3 | 4 | 0 | non-pCR |
| GSM615801 | 59 | IIIC | 2 | 4 | 1 | non-pCR |
| GSM615804 | 35 | IIIA | 3 | 3 | 1 | non-pCR |
| GSM615813 | 68 | IIB  | 3 | 3 | 0 | non-pCR |
| GSM615815 | 37 | IIA  | 2 | 2 | 0 | non-pCR |
| GSM809185 | 56 | IIIA | 3 | 3 | 1 | pCR     |
| GSM809186 | 67 | IIIA | 2 | 3 | 1 | non-pCR |
| GSM809204 | 30 | IIA  | 2 | 2 | 0 | non-pCR |
| GSM809208 | 50 | IIB  | 2 | 2 | 1 | non-pCR |
| GSM809209 | 43 | IIIA | 3 | 3 | 1 | non-pCR |
| GSM809214 | 42 | IIB  | 2 | 2 | 1 | non-pCR |
| GSM809220 | 58 | IIB  | 1 | 2 | 1 | non-pCR |
| GSM809224 | 63 | IIA  | 2 | 2 | 0 | non-pCR |
| GSM809225 | 61 | IIB  | 3 | 2 | 1 | pCR     |
| GSM809227 | 49 | IIB  | 2 | 2 | 1 | non-pCR |
| GSM809230 | 42 | IIA  | 2 | 2 | 0 | non-pCR |

|           |    |      |   |   |   |         |
|-----------|----|------|---|---|---|---------|
| GSM809231 | 28 | IIB  | 2 | 2 | 1 | pCR     |
| GSM809232 | 68 | IIB  | 2 | 2 | 1 | pCR     |
| GSM809237 | 63 | IIB  | 3 | 2 | 1 | pCR     |
| GSM809239 | 68 | IIB  | 2 | 2 | 1 | non-pCR |
| GSM809247 | 54 | IIIB | 3 | 4 | 1 | non-pCR |
| GSM809248 | 36 | IIB  | 2 | 2 | 1 | pCR     |
| GSM809251 | 61 | IIB  | 2 | 2 | 1 | non-pCR |
| GSM809255 | 62 | IIB  | 3 | 2 | 1 | non-pCR |
| GSM809266 | 70 | IIB  | 2 | 2 | 1 | pCR     |
| GSM809273 | 63 | IIIA | 3 | 3 | 1 | non-pCR |
| GSM809274 | 53 | IIA  | 3 | 1 | 1 | pCR     |
| GSM809277 | 36 | IIA  | 3 | 2 | 0 | non-pCR |
| GSM809278 | 63 | IIB  | 2 | 2 | 1 | non-pCR |
| GSM809280 | 60 | IIB  | 3 | 2 | 1 | pCR     |
| GSM809295 | 68 | IIB  | 3 | 2 | 1 | pCR     |

**Table S4. Differentially expressed genes of molecular phenotypes of TNBC**

| Gene      | logFC  | AveExpr | t      | P. Value | adj.P. Val | B      | threshold |
|-----------|--------|---------|--------|----------|------------|--------|-----------|
| SMARCC2   | 5.011  | 8.467   | 16.496 | 2.15E-40 | 3.20E-37   | 80.938 | Up        |
| VHL       | 10.421 | 6.175   | 15.842 | 2.78E-38 | 2.06E-35   | 76.167 | Up        |
| KANSL3    | 6.896  | 5.562   | 14.856 | 4.36E-35 | 1.62E-32   | 68.940 | Up        |
| SOX3      | 7.548  | 5.881   | 12.870 | 1.16E-28 | 2.15E-26   | 54.403 | Up        |
| NPAS3     | 5.813  | 6.727   | 11.378 | 6.49E-24 | 4.20E-22   | 43.653 | Up        |
| SYN1      | 5.888  | 6.173   | 11.336 | 8.79E-24 | 5.44E-22   | 43.355 | Up        |
| RBM8A     | 3.243  | 10.104  | 11.173 | 2.85E-23 | 1.69E-21   | 42.199 | Up        |
| OTOF      | 5.198  | 4.029   | 10.772 | 5.03E-22 | 2.37E-20   | 39.377 | Up        |
| DCAF13    | 4.574  | 6.580   | 10.595 | 1.77E-21 | 7.97E-20   | 38.141 | Up        |
| SYCE1L    | 7.363  | 6.098   | 10.482 | 3.94E-21 | 1.54E-19   | 37.355 | Up        |
| TK1       | 3.365  | 9.776   | 10.341 | 1.07E-20 | 3.78E-19   | 36.376 | Up        |
| HP1BP3    | 5.281  | 6.273   | 10.326 | 1.18E-20 | 4.02E-19   | 36.277 | Up        |
| AKT2      | 4.513  | 7.126   | 10.292 | 1.50E-20 | 4.96E-19   | 36.042 | Up        |
| SCARB1    | 3.178  | 9.457   | 9.874  | 2.76E-19 | 8.22E-18   | 33.180 | Up        |
| MFI2      | 5.095  | 6.007   | 9.776  | 5.44E-19 | 1.50E-17   | 32.516 | Up        |
| ZKSCAN1   | 3.614  | 9.326   | 9.622  | 1.57E-18 | 4.18E-17   | 31.473 | Up        |
| TONSL     | 5.050  | 3.563   | 9.526  | 3.02E-18 | 7.88E-17   | 30.832 | Up        |
| FRMD8     | 4.370  | 6.186   | 9.512  | 3.33E-18 | 8.54E-17   | 30.736 | Up        |
| FUT6      | 4.783  | 9.630   | 9.403  | 6.99E-18 | 1.70E-16   | 30.009 | Up        |
| HLA.F.AS1 | 3.198  | 8.266   | 9.337  | 1.09E-17 | 2.62E-16   | 29.571 | Up        |
| RARS2     | 6.826  | 4.803   | 9.144  | 4.02E-17 | 9.06E-16   | 28.293 | Up        |
| MYL12A    | 2.255  | 11.189  | 9.063  | 6.93E-17 | 1.49E-15   | 27.760 | Up        |
| ASMTL.AS1 | 4.457  | 3.415   | 8.928  | 1.71E-16 | 3.63E-15   | 26.875 | Up        |
| CYP2U1    | 4.140  | 4.088   | 8.918  | 1.82E-16 | 3.81E-15   | 26.812 | Up        |
| EML4      | 2.317  | 8.696   | 8.906  | 1.97E-16 | 4.07E-15   | 26.733 | Up        |
| JPH2      | 3.760  | 3.717   | 8.843  | 2.99E-16 | 5.92E-15   | 26.327 | Up        |
| SREBF1    | 3.280  | 9.137   | 8.778  | 4.59E-16 | 8.76E-15   | 25.905 | Up        |
| FIP1L1    | 3.193  | 8.111   | 8.544  | 2.13E-15 | 3.76E-14   | 24.404 | Up        |
| SLC26A1   | 3.578  | 7.031   | 8.448  | 3.97E-15 | 6.94E-14   | 23.792 | Up        |
| BAGE      | 4.639  | 5.857   | 8.359  | 7.03E-15 | 1.20E-13   | 23.232 | Up        |
| BSDC1     | 1.634  | 9.389   | 8.277  | 1.19E-14 | 1.99E-13   | 22.714 | Up        |
| KCNK15    | 4.907  | 4.270   | 7.834  | 1.96E-13 | 2.78E-12   | 19.976 | Up        |
| CNP       | 1.904  | 10.320  | 7.828  | 2.04E-13 | 2.86E-12   | 19.938 | Up        |
| ETV3      | 5.129  | 4.816   | 7.761  | 3.08E-13 | 4.13E-12   | 19.534 | Up        |
| CAMTA1    | 6.174  | 5.674   | 7.621  | 7.33E-13 | 9.15E-12   | 18.687 | Up        |
| CYB5R3    | 2.243  | 11.545  | 7.530  | 1.28E-12 | 1.55E-11   | 18.142 | Up        |
| SEC23IP   | 1.707  | 8.671   | 7.520  | 1.36E-12 | 1.61E-11   | 18.085 | Up        |
| HEATR3    | 2.672  | 7.917   | 7.504  | 1.50E-12 | 1.75E-11   | 17.989 | Up        |
| NOL3      | 2.906  | 8.350   | 7.455  | 2.02E-12 | 2.34E-11   | 17.698 | Up        |
| EXOSC1    | 5.195  | 5.335   | 7.381  | 3.15E-12 | 3.60E-11   | 17.263 | Up        |
| TMEM80    | 2.400  | 7.546   | 7.268  | 6.19E-12 | 6.72E-11   | 16.603 | Up        |
| RP2       | 2.714  | 6.416   | 7.249  | 6.95E-12 | 7.43E-11   | 16.490 | Up        |



|            |       |        |       |          |          |        |    |
|------------|-------|--------|-------|----------|----------|--------|----|
| ELL        | 2.699 | 7.411  | 7.217 | 8.39E-12 | 8.92E-11 | 16.306 | Up |
| STMN1      | 3.740 | 9.089  | 7.214 | 8.56E-12 | 9.02E-11 | 16.287 | Up |
| ECE2       | 2.978 | 7.481  | 7.116 | 1.53E-11 | 1.59E-10 | 15.718 | Up |
| KIF26B     | 4.437 | 4.584  | 7.032 | 2.51E-11 | 2.54E-10 | 15.237 | Up |
| GOLGA3     | 2.070 | 9.004  | 7.022 | 2.66E-11 | 2.67E-10 | 15.182 | Up |
| TMLHE      | 3.315 | 5.517  | 6.991 | 3.19E-11 | 3.10E-10 | 15.004 | Up |
| MAP3K6     | 3.884 | 7.506  | 6.971 | 3.59E-11 | 3.44E-10 | 14.890 | Up |
| KIAA1731   | 4.949 | 4.300  | 6.892 | 5.68E-11 | 5.34E-10 | 14.443 | Up |
| FBXO22     | 3.733 | 5.191  | 6.834 | 7.90E-11 | 7.29E-10 | 14.121 | Up |
| ICK        | 3.203 | 6.172  | 6.823 | 8.42E-11 | 7.72E-10 | 14.059 | Up |
| ANKRD36BP2 | 6.512 | 3.634  | 6.823 | 8.46E-11 | 7.72E-10 | 14.054 | Up |
| RAI1       | 4.199 | 5.332  | 6.752 | 1.26E-10 | 1.13E-09 | 13.663 | Up |
| SLC25A28   | 2.581 | 8.555  | 6.740 | 1.36E-10 | 1.20E-09 | 13.592 | Up |
| NBR1       | 1.429 | 9.502  | 6.733 | 1.41E-10 | 1.24E-09 | 13.554 | Up |
| ZDHHC14    | 3.247 | 6.243  | 6.726 | 1.47E-10 | 1.29E-09 | 13.515 | Up |
| GIT2       | 3.789 | 5.944  | 6.725 | 1.48E-10 | 1.29E-09 | 13.509 | Up |
| DDX51      | 4.029 | 4.967  | 6.675 | 1.96E-10 | 1.66E-09 | 13.235 | Up |
| ZNF24      | 1.318 | 10.512 | 6.670 | 2.03E-10 | 1.69E-09 | 13.204 | Up |
| NT5C       | 2.688 | 7.395  | 6.661 | 2.13E-10 | 1.77E-09 | 13.155 | Up |
| THRA       | 1.793 | 8.114  | 6.654 | 2.21E-10 | 1.82E-09 | 13.120 | Up |
| TNK2       | 2.682 | 8.174  | 6.521 | 4.67E-10 | 3.67E-09 | 12.393 | Up |
| ZNF254     | 3.980 | 6.093  | 6.510 | 4.96E-10 | 3.86E-09 | 12.333 | Up |
| MICALL2    | 3.455 | 8.062  | 6.407 | 8.79E-10 | 6.51E-09 | 11.777 | Up |
| SLC2A4RG   | 2.895 | 9.360  | 6.394 | 9.46E-10 | 6.96E-09 | 11.707 | Up |
| RANBP10    | 1.365 | 8.459  | 6.343 | 1.25E-09 | 9.10E-09 | 11.432 | Up |
| CARS2      | 2.964 | 9.435  | 6.333 | 1.33E-09 | 9.57E-09 | 11.378 | Up |
| CCDC57     | 3.109 | 5.618  | 6.275 | 1.82E-09 | 1.30E-08 | 11.070 | Up |
| NOS1AP     | 1.876 | 4.902  | 6.168 | 3.26E-09 | 2.24E-08 | 10.505 | Up |
| MTSS1L     | 4.503 | 4.458  | 6.101 | 4.67E-09 | 3.14E-08 | 10.157 | Up |
| TNXB       | 2.352 | 7.049  | 6.074 | 5.40E-09 | 3.61E-08 | 10.017 | Up |
| DTYMK      | 2.322 | 8.817  | 6.021 | 7.16E-09 | 4.69E-08 | 9.743  | Up |
| CXorf36    | 2.408 | 5.391  | 6.013 | 7.47E-09 | 4.87E-08 | 9.701  | Up |
| BCL2L11    | 2.653 | 7.235  | 5.949 | 1.05E-08 | 6.77E-08 | 9.375  | Up |
| SYMPK      | 3.377 | 6.952  | 5.945 | 1.07E-08 | 6.85E-08 | 9.354  | Up |
| RRP8       | 1.745 | 8.432  | 5.892 | 1.41E-08 | 8.99E-08 | 9.088  | Up |
| ATP6V0A2   | 2.056 | 7.219  | 5.851 | 1.74E-08 | 1.10E-07 | 8.881  | Up |
| CCDC144A   | 4.105 | 4.544  | 5.841 | 1.84E-08 | 1.16E-07 | 8.828  | Up |
| RARA       | 2.712 | 7.549  | 5.809 | 2.17E-08 | 1.36E-07 | 8.669  | Up |
| SLC38A10   | 2.397 | 9.175  | 5.796 | 2.32E-08 | 1.44E-07 | 8.604  | Up |
| ERICH1     | 4.082 | 5.000  | 5.792 | 2.37E-08 | 1.47E-07 | 8.582  | Up |
| VASH1      | 1.933 | 8.035  | 5.791 | 2.38E-08 | 1.47E-07 | 8.581  | Up |
| PTCD2      | 2.434 | 5.593  | 5.770 | 2.65E-08 | 1.63E-07 | 8.475  | Up |
| FRMD4A     | 2.363 | 7.912  | 5.764 | 2.73E-08 | 1.67E-07 | 8.446  | Up |
| C2         | 2.853 | 8.484  | 5.739 | 3.11E-08 | 1.87E-07 | 8.321  | Up |
| ZNF215     | 2.084 | 4.860  | 5.705 | 3.72E-08 | 2.20E-07 | 8.149  | Up |

|          |       |        |       |          |          |       |    |
|----------|-------|--------|-------|----------|----------|-------|----|
| ASTN2    | 2.711 | 6.307  | 5.699 | 3.82E-08 | 2.25E-07 | 8.123 | Up |
| RASAL2   | 3.277 | 6.441  | 5.694 | 3.93E-08 | 2.31E-07 | 8.094 | Up |
| ZBTB44   | 3.729 | 5.710  | 5.679 | 4.23E-08 | 2.47E-07 | 8.024 | Up |
| ZNF787   | 3.232 | 5.780  | 5.669 | 4.45E-08 | 2.58E-07 | 7.974 | Up |
| DIAPH1   | 2.698 | 9.108  | 5.640 | 5.16E-08 | 2.96E-07 | 7.833 | Up |
| CBS      | 2.770 | 8.587  | 5.596 | 6.46E-08 | 3.62E-07 | 7.615 | Up |
| YEATS2   | 1.376 | 9.097  | 5.580 | 7.01E-08 | 3.90E-07 | 7.536 | Up |
| EYA3     | 3.028 | 5.810  | 5.576 | 7.13E-08 | 3.96E-07 | 7.520 | Up |
| C5orf42  | 3.883 | 5.455  | 5.562 | 7.66E-08 | 4.22E-07 | 7.450 | Up |
| EXOSC10  | 1.735 | 8.443  | 5.526 | 9.16E-08 | 4.99E-07 | 7.278 | Up |
| ATP10A   | 1.567 | 7.654  | 5.523 | 9.33E-08 | 5.06E-07 | 7.260 | Up |
| AGBL3    | 4.299 | 3.486  | 5.500 | 1.05E-07 | 5.62E-07 | 7.149 | Up |
| RAD54L2  | 2.898 | 6.080  | 5.497 | 1.06E-07 | 5.66E-07 | 7.139 | Up |
| SMEK2    | 2.048 | 6.385  | 5.489 | 1.10E-07 | 5.87E-07 | 7.100 | Up |
| ASPHD1   | 3.259 | 4.613  | 5.455 | 1.31E-07 | 6.89E-07 | 6.935 | Up |
| MAPKBP1  | 2.790 | 6.331  | 5.423 | 1.53E-07 | 7.94E-07 | 6.782 | Up |
| ESRRA    | 1.138 | 9.105  | 5.417 | 1.57E-07 | 8.12E-07 | 6.756 | Up |
| BEST1    | 2.314 | 6.818  | 5.397 | 1.74E-07 | 8.91E-07 | 6.660 | Up |
| PTRF     | 3.419 | 9.569  | 5.386 | 1.84E-07 | 9.34E-07 | 6.608 | Up |
| ITGAX    | 3.267 | 5.969  | 5.369 | 2.00E-07 | 1.01E-06 | 6.526 | Up |
| FOXC1    | 2.718 | 9.884  | 5.341 | 2.29E-07 | 1.15E-06 | 6.394 | Up |
| STOML1   | 2.178 | 7.961  | 5.325 | 2.48E-07 | 1.24E-06 | 6.320 | Up |
| RPAIN    | 2.889 | 7.100  | 5.324 | 2.49E-07 | 1.24E-06 | 6.316 | Up |
| MUC4     | 2.977 | 5.493  | 5.296 | 2.86E-07 | 1.42E-06 | 6.182 | Up |
| BCL2L2   | 1.184 | 9.018  | 5.271 | 3.21E-07 | 1.60E-06 | 6.069 | Up |
| ZNF506   | 2.241 | 6.967  | 5.254 | 3.49E-07 | 1.73E-06 | 5.989 | Up |
| PCNXL2   | 1.740 | 8.235  | 5.250 | 3.56E-07 | 1.76E-06 | 5.969 | Up |
| TIE1     | 3.551 | 3.447  | 5.239 | 3.76E-07 | 1.85E-06 | 5.916 | Up |
| LMNA     | 1.716 | 11.225 | 5.220 | 4.11E-07 | 2.01E-06 | 5.831 | Up |
| RECQL4   | 3.718 | 6.729  | 5.220 | 4.12E-07 | 2.01E-06 | 5.830 | Up |
| BLZF1    | 2.708 | 6.366  | 5.218 | 4.15E-07 | 2.02E-06 | 5.823 | Up |
| UBE2O    | 2.988 | 6.645  | 5.202 | 4.48E-07 | 2.16E-06 | 5.749 | Up |
| KLHL29   | 3.228 | 5.140  | 5.200 | 4.54E-07 | 2.18E-06 | 5.736 | Up |
| SREK1IP1 | 2.987 | 7.170  | 5.194 | 4.66E-07 | 2.22E-06 | 5.710 | Up |
| SUV39H2  | 3.247 | 6.318  | 5.193 | 4.68E-07 | 2.22E-06 | 5.707 | Up |
| OR2H1    | 2.404 | 6.587  | 5.157 | 5.55E-07 | 2.62E-06 | 5.542 | Up |
| APBB1IP  | 2.466 | 7.265  | 5.150 | 5.75E-07 | 2.71E-06 | 5.509 | Up |
| MAP3K13  | 3.120 | 6.135  | 5.144 | 5.93E-07 | 2.78E-06 | 5.479 | Up |
| ARHGAP22 | 2.315 | 7.192  | 5.138 | 6.08E-07 | 2.84E-06 | 5.456 | Up |
| ARL3     | 1.869 | 8.931  | 5.107 | 7.07E-07 | 3.29E-06 | 5.311 | Up |
| MGA      | 2.837 | 6.658  | 5.060 | 8.79E-07 | 4.04E-06 | 5.101 | Up |
| PEX14    | 2.263 | 8.174  | 5.059 | 8.85E-07 | 4.05E-06 | 5.095 | Up |
| UGGT2    | 2.015 | 8.079  | 5.008 | 1.12E-06 | 5.03E-06 | 4.867 | Up |
| NEMF     | 1.590 | 9.410  | 4.983 | 1.26E-06 | 5.60E-06 | 4.755 | Up |
| OTUD7B   | 3.056 | 4.454  | 4.965 | 1.37E-06 | 6.05E-06 | 4.675 | Up |

|           |       |        |       |          |             |       |    |
|-----------|-------|--------|-------|----------|-------------|-------|----|
| UBE2W     | 1.097 | 8.237  | 4.955 | 1.44E-06 | 6.33E-06    | 4.630 | Up |
| BTBD7     | 3.401 | 5.881  | 4.952 | 1.45E-06 | 6.38E-06    | 4.619 | Up |
| EFNA2     | 2.239 | 5.183  | 4.927 | 1.64E-06 | 7.13E-06    | 4.506 | Up |
| ZNF493    | 3.204 | 5.939  | 4.924 | 1.66E-06 | 7.21E-06    | 4.492 | Up |
| ARHGEF10  | 2.999 | 8.018  | 4.907 | 1.80E-06 | 7.76E-06    | 4.416 | Up |
| ITGA1     | 3.907 | 4.572  | 4.901 | 1.84E-06 | 7.93E-06    | 4.394 | Up |
| GON4L     | 1.137 | 9.800  | 4.886 | 1.97E-06 | 8.43E-06    | 4.326 | Up |
| PHF20L1   | 1.273 | 8.445  | 4.856 | 2.27E-06 | 9.63E-06    | 4.194 | Up |
| GPR125    | 1.659 | 8.793  | 4.795 | 2.99E-06 | 1.26E-05    | 3.928 | Up |
| CCDC82    | 2.076 | 6.679  | 4.788 | 3.08E-06 | 1.29E-05    | 3.901 | Up |
| SMPDL3B   | 3.616 | 4.873  | 4.785 | 3.13E-06 | 1.31E-05    | 3.885 | Up |
| MEG3      | 2.567 | 6.761  | 4.781 | 3.18E-06 | 1.32E-05    | 3.871 | Up |
| PGM5      | 2.300 | 4.632  | 4.750 | 3.66E-06 | 1.51E-05    | 3.735 | Up |
| CNPY2     | 1.788 | 10.798 | 4.728 | 4.04E-06 | 1.66E-05    | 3.641 | Up |
| PDE6B     | 2.371 | 4.798  | 4.721 | 4.16E-06 | 1.70E-05    | 3.613 | Up |
| NOC2L     | 1.677 | 8.692  | 4.719 | 4.21E-06 | 1.71E-05    | 3.602 | Up |
| COTL1     | 2.023 | 10.500 | 4.718 | 4.23E-06 | 1.71E-05    | 3.598 | Up |
| ZNF446    | 2.429 | 6.671  | 4.710 | 4.37E-06 | 1.76E-05    | 3.567 | Up |
| SETMAR    | 1.854 | 7.765  | 4.676 | 5.08E-06 | 2.03E-05    | 3.422 | Up |
| PLXNA1    | 1.816 | 8.948  | 4.665 | 5.35E-06 | 2.13E-05    | 3.372 | Up |
| PPP1R12B  | 1.163 | 8.592  | 4.647 | 5.80E-06 | 2.29E-05    | 3.297 | Up |
| IL11RA    | 1.629 | 7.621  | 4.642 | 5.92E-06 | 2.34E-05    | 3.276 | Up |
| CDC42BPB  | 3.041 | 7.264  | 4.626 | 6.34E-06 | 2.47E-05    | 3.211 | Up |
| HGSNAT    | 1.717 | 9.210  | 4.611 | 6.77E-06 | 2.63E-05    | 3.148 | Up |
| LMO7      | 2.721 | 5.799  | 4.594 | 7.30E-06 | 2.82E-05    | 3.077 | Up |
| HPS4      | 2.115 | 7.574  | 4.582 | 7.68E-06 | 2.95E-05    | 3.027 | Up |
| MFN2      | 1.617 | 9.555  | 4.571 | 8.08E-06 | 3.09E-05    | 2.980 | Up |
| LMF1      | 2.266 | 6.745  | 4.554 | 8.68E-06 | 3.29E-05    | 2.911 | Up |
| CHML      | 2.502 | 6.741  | 4.521 | 1.00E-05 | 3.79E-05    | 2.773 | Up |
| RNFT2     | 2.727 | 6.241  | 4.516 | 1.02E-05 | 3.85E-05    | 2.754 | Up |
| MCPH1     | 2.335 | 4.018  | 4.508 | 1.06E-05 | 3.98E-05    | 2.721 | Up |
| ZAK       | 1.520 | 7.444  | 4.493 | 1.13E-05 | 4.23E-05    | 2.660 | Up |
| BPNT1     | 2.865 | 6.208  | 4.483 | 1.18E-05 | 4.41E-05    | 2.617 | Up |
| LTB       | 2.665 | 8.945  | 4.481 | 1.19E-05 | 4.43E-05    | 2.609 | Up |
| RHOBTB2   | 1.964 | 5.955  | 4.462 | 1.29E-05 | 4.75E-05    | 2.533 | Up |
| HCG18     | 1.955 | 7.102  | 4.450 | 1.36E-05 | 5.01E-05    | 2.481 | Up |
| RNH1      | 2.367 | 9.947  | 4.416 | 1.57E-05 | 5.71E-05    | 2.347 | Up |
| CD79A     | 2.091 | 8.347  | 4.397 | 1.70E-05 | 6.13E-05    | 2.270 | Up |
| GPD1      | 2.178 | 5.628  | 4.385 | 1.80E-05 | 6.43E-05    | 2.219 | Up |
| C10orf76  | 1.722 | 7.346  | 4.358 | 2.01E-05 | 7.15E-05    | 2.112 | Up |
| SVEP1     | 1.879 | 6.115  | 4.350 | 2.08E-05 | 7.38E-05    | 2.081 | Up |
| LOC389906 | 3.534 | 5.978  | 4.334 | 2.23E-05 | 7.88E-05    | 2.015 | Up |
| BBS9      | 1.339 | 7.062  | 4.316 | 2.40E-05 | 8.44E-05    | 1.944 | Up |
| DHX35     | 2.202 | 6.646  | 4.304 | 2.52E-05 | 8.80E-05    | 1.900 | Up |
| KIAA0513  | 1.623 | 7.688  | 4.261 | 3.01E-05 | 0.000104909 | 1.729 | Up |

|          |       |        |       |             |             |        |    |
|----------|-------|--------|-------|-------------|-------------|--------|----|
| POFUT2   | 1.395 | 8.334  | 4.260 | 3.03E-05    | 0.000105277 | 1.723  | Up |
| CDON     | 2.390 | 4.368  | 4.252 | 3.13E-05    | 0.000108369 | 1.694  | Up |
| CDKL1    | 2.230 | 4.133  | 4.250 | 3.15E-05    | 0.00010907  | 1.685  | Up |
| RBM14    | 1.939 | 8.651  | 4.240 | 3.28E-05    | 0.000112999 | 1.648  | Up |
| ZNF573   | 1.716 | 7.373  | 4.229 | 3.44E-05    | 0.000117971 | 1.605  | Up |
| PTBP2    | 1.418 | 8.241  | 4.227 | 3.47E-05    | 0.000118819 | 1.596  | Up |
| IFIH1    | 2.592 | 8.709  | 4.222 | 3.54E-05    | 0.000121158 | 1.575  | Up |
| ZAP70    | 2.413 | 6.661  | 4.221 | 3.56E-05    | 0.000121322 | 1.571  | Up |
| MYH11    | 2.423 | 6.217  | 4.147 | 4.81E-05    | 0.0001629   | 1.286  | Up |
| FOXN1    | 1.191 | 3.992  | 4.143 | 4.88E-05    | 0.000164935 | 1.272  | Up |
| ZBTB3    | 2.124 | 6.310  | 4.122 | 5.31E-05    | 0.000178612 | 1.193  | Up |
| TTC12    | 1.505 | 7.076  | 4.111 | 5.56E-05    | 0.000186655 | 1.149  | Up |
| PTGIR    | 1.903 | 5.987  | 4.095 | 5.93E-05    | 0.000197999 | 1.089  | Up |
| POLH     | 2.523 | 6.460  | 4.093 | 5.98E-05    | 0.000199402 | 1.080  | Up |
| N4BP2L2  | 1.531 | 9.731  | 4.054 | 6.98E-05    | 0.000230138 | 0.934  | Up |
| PAK1     | 2.391 | 6.208  | 4.039 | 7.39E-05    | 0.000242601 | 0.881  | Up |
| XCR1     | 1.796 | 5.212  | 4.038 | 7.44E-05    | 0.000243717 | 0.874  | Up |
| TPH1     | 2.596 | 3.803  | 4.027 | 7.76E-05    | 0.000253691 | 0.834  | Up |
| TERT     | 1.848 | 5.569  | 3.996 | 8.77E-05    | 0.00028473  | 0.719  | Up |
| C19orf66 | 1.500 | 9.439  | 3.987 | 9.08E-05    | 0.000294084 | 0.687  | Up |
| PAPOLG   | 1.560 | 7.120  | 3.980 | 9.34E-05    | 0.000301111 | 0.660  | Up |
| PRKCA    | 1.615 | 7.911  | 3.972 | 9.66E-05    | 0.000310141 | 0.629  | Up |
| GAMT     | 2.767 | 5.642  | 3.959 | 0.000101426 | 0.000323697 | 0.582  | Up |
| KPNA4    | 2.023 | 7.931  | 3.959 | 0.000101441 | 0.000323697 | 0.582  | Up |
| EDN1     | 2.748 | 7.281  | 3.946 | 0.000106907 | 0.000340408 | 0.533  | Up |
| TRAPPC10 | 2.139 | 7.120  | 3.937 | 0.000110375 | 0.000348466 | 0.503  | Up |
| QTRTD1   | 1.775 | 7.253  | 3.894 | 0.000130787 | 0.000410294 | 0.343  | Up |
| METTL8   | 2.980 | 6.574  | 3.881 | 0.000137204 | 0.00042714  | 0.298  | Up |
| WDR60    | 2.353 | 5.861  | 3.881 | 0.000137305 | 0.00042714  | 0.298  | Up |
| CDH7     | 1.552 | 3.671  | 3.859 | 0.000149319 | 0.000462578 | 0.219  | Up |
| DYNC1H1  | 1.559 | 10.082 | 3.842 | 0.00015932  | 0.000491511 | 0.158  | Up |
| KLF6     | 2.082 | 9.723  | 3.825 | 0.000170352 | 0.000521222 | 0.095  | Up |
| LINS     | 2.630 | 5.614  | 3.806 | 0.000183188 | 0.000557058 | 0.027  | Up |
| CASP8    | 1.439 | 8.653  | 3.752 | 0.000224541 | 0.000671817 | -0.164 | Up |
| RGS11    | 1.842 | 5.889  | 3.745 | 0.000229697 | 0.000684489 | -0.185 | Up |
| CLDND1   | 1.477 | 9.239  | 3.742 | 0.000232558 | 0.000691626 | -0.197 | Up |
| SCPEP1   | 1.206 | 10.111 | 3.729 | 0.000244099 | 0.000721621 | -0.242 | Up |
| BRF1     | 1.772 | 6.602  | 3.699 | 0.0002728   | 0.000801688 | -0.346 | Up |
| TEAD1    | 1.348 | 7.898  | 3.697 | 0.000275203 | 0.000807155 | -0.354 | Up |
| PEX13    | 1.999 | 7.775  | 3.664 | 0.00031106  | 0.000908696 | -0.468 | Up |
| KIAA0430 | 1.150 | 9.448  | 3.651 | 0.000326197 | 0.000943687 | -0.513 | Up |
| MAP4K4   | 1.101 | 8.724  | 3.640 | 0.000339768 | 0.000973046 | -0.551 | Up |
| NLRX1    | 1.654 | 8.017  | 3.639 | 0.000340272 | 0.000973046 | -0.552 | Up |
| MANEA    | 2.740 | 5.696  | 3.631 | 0.000350978 | 0.000999816 | -0.581 | Up |
| DNASE1   | 2.181 | 4.078  | 3.626 | 0.000356991 | 0.001013065 | -0.597 | Up |

|            |       |        |       |             |             |        |    |
|------------|-------|--------|-------|-------------|-------------|--------|----|
| FABP6      | 2.237 | 3.507  | 3.614 | 0.000373535 | 0.001053978 | -0.639 | Up |
| NDUFA7     | 2.341 | 8.522  | 3.609 | 0.000380702 | 0.001072165 | -0.657 | Up |
| ACTR3B     | 1.630 | 8.749  | 3.599 | 0.000394924 | 0.001110116 | -0.691 | Up |
| SLC5A12    | 2.559 | 3.503  | 3.597 | 0.000397127 | 0.001113529 | -0.696 | Up |
| SSTR3      | 1.327 | 4.872  | 3.571 | 0.00043608  | 0.001216606 | -0.783 | Up |
| SSPN       | 2.056 | 7.376  | 3.523 | 0.000518642 | 0.001433494 | -0.945 | Up |
| MYO1D      | 2.604 | 6.177  | 3.478 | 0.000607479 | 0.001666645 | -1.092 | Up |
| ZNF428     | 2.042 | 5.515  | 3.474 | 0.00061698  | 0.001686487 | -1.106 | Up |
| SEPW1      | 1.050 | 11.545 | 3.457 | 0.000654872 | 0.001776998 | -1.161 | Up |
| RECQL5     | 1.300 | 7.111  | 3.449 | 0.000672911 | 0.001812715 | -1.186 | Up |
| SERPINB8   | 1.214 | 7.422  | 3.441 | 0.000691605 | 0.001849669 | -1.212 | Up |
| DNM2       | 1.155 | 8.242  | 3.440 | 0.000696283 | 0.001855508 | -1.218 | Up |
| CCDC88A    | 1.738 | 7.015  | 3.436 | 0.000705379 | 0.001876385 | -1.230 | Up |
| PAQR3      | 1.525 | 7.275  | 3.435 | 0.000707646 | 0.001878478 | -1.233 | Up |
| FGF7       | 1.472 | 6.921  | 3.424 | 0.000734802 | 0.001944218 | -1.268 | Up |
| ZCCHC10    | 1.300 | 7.427  | 3.413 | 0.000762858 | 0.002014867 | -1.303 | Up |
| CASC5      | 2.678 | 4.939  | 3.412 | 0.000766332 | 0.002020453 | -1.307 | Up |
| CARHSP1    | 1.689 | 8.453  | 3.405 | 0.000785782 | 0.002060771 | -1.330 | Up |
| MEF2BNB    | 1.632 | 7.261  | 3.403 | 0.000792093 | 0.002073666 | -1.337 | Up |
| DGKH       | 1.303 | 7.790  | 3.385 | 0.000842323 | 0.00220129  | -1.394 | Up |
| KCNE4      | 2.151 | 5.649  | 3.376 | 0.000868611 | 0.002258084 | -1.423 | Up |
| ESRRB      | 1.569 | 3.916  | 3.336 | 0.000996729 | 0.002557615 | -1.550 | Up |
| DTWD1      | 1.901 | 6.694  | 3.336 | 0.00099759  | 0.002557615 | -1.551 | Up |
| MCM3AP.AS1 | 1.093 | 7.396  | 3.330 | 0.001016374 | 0.002601287 | -1.568 | Up |
| NADSYN1    | 1.919 | 7.150  | 3.311 | 0.001086729 | 0.002776575 | -1.630 | Up |
| HIP1       | 1.018 | 7.696  | 3.300 | 0.001125154 | 0.002864903 | -1.662 | Up |
| PLCE1      | 1.696 | 6.414  | 3.296 | 0.001144131 | 0.002903282 | -1.677 | Up |
| ATP8B3     | 1.899 | 4.788  | 3.292 | 0.001156207 | 0.002918982 | -1.687 | Up |
| IQSEC3     | 1.546 | 5.541  | 3.270 | 0.001247972 | 0.003113649 | -1.757 | Up |
| GSN        | 1.043 | 10.685 | 3.222 | 0.001466496 | 0.003616385 | -1.906 | Up |
| HLA.DOB    | 2.274 | 6.962  | 3.201 | 0.0015722   | 0.003851501 | -1.970 | Up |
| SF3B2      | 1.647 | 9.533  | 3.194 | 0.001605669 | 0.003927022 | -1.989 | Up |
| VPS13B     | 1.020 | 8.755  | 3.181 | 0.001679655 | 0.004101226 | -2.030 | Up |
| MOXD1      | 1.151 | 8.318  | 3.155 | 0.001829094 | 0.00444422  | -2.108 | Up |
| CNTLN      | 1.699 | 6.353  | 3.150 | 0.001858518 | 0.004508346 | -2.123 | Up |
| ANKH       | 2.027 | 5.575  | 3.141 | 0.001911938 | 0.004630377 | -2.149 | Up |
| STXBP3     | 1.152 | 8.417  | 3.128 | 0.001996483 | 0.004819433 | -2.189 | Up |
| ZNF135     | 2.387 | 5.936  | 3.113 | 0.002095308 | 0.005049795 | -2.233 | Up |
| ATF2       | 1.113 | 7.708  | 3.103 | 0.00216252  | 0.005186559 | -2.262 | Up |
| KAZALD1    | 1.783 | 6.377  | 3.098 | 0.00220335  | 0.005267495 | -2.279 | Up |
| CDHR1      | 1.378 | 3.389  | 3.088 | 0.002276472 | 0.005424862 | -2.309 | Up |
| PRSS23     | 2.173 | 8.319  | 3.064 | 0.002459133 | 0.005822819 | -2.379 | Up |
| A2M        | 2.050 | 11.007 | 3.063 | 0.002464902 | 0.005827201 | -2.381 | Up |
| WNT4       | 2.017 | 5.260  | 3.055 | 0.002523984 | 0.005947962 | -2.403 | Up |
| PWP2       | 1.616 | 7.919  | 3.053 | 0.002543337 | 0.005984085 | -2.410 | Up |

|          |       |        |       |             |             |        |    |
|----------|-------|--------|-------|-------------|-------------|--------|----|
| DSE      | 1.457 | 8.696  | 3.038 | 0.002670928 | 0.006244765 | -2.455 | Up |
| DYNC2LI1 | 1.085 | 7.287  | 3.034 | 0.002704184 | 0.006309053 | -2.466 | Up |
| ACVR2B   | 1.051 | 8.719  | 3.033 | 0.002706911 | 0.006309053 | -2.467 | Up |
| PELO     | 1.000 | 8.777  | 3.022 | 0.002807561 | 0.00650287  | -2.500 | Up |
| TRIB3    | 1.236 | 9.403  | 3.021 | 0.00281642  | 0.006513244 | -2.503 | Up |
| VCPIP1   | 1.733 | 6.326  | 2.974 | 0.003268951 | 0.007466866 | -2.638 | Up |
| PMP22    | 1.751 | 9.962  | 2.954 | 0.003471992 | 0.007894269 | -2.693 | Up |
| TIPRL    | 1.200 | 9.411  | 2.947 | 0.003556409 | 0.008037046 | -2.715 | Up |
| DNAJC3   | 1.347 | 7.804  | 2.946 | 0.00356084  | 0.008037046 | -2.716 | Up |
| WAPAL    | 1.030 | 9.068  | 2.938 | 0.003647913 | 0.008169348 | -2.738 | Up |
| S100B    | 2.667 | 5.565  | 2.923 | 0.003829059 | 0.008498224 | -2.782 | Up |
| SLC9A7   | 2.012 | 5.551  | 2.907 | 0.004014927 | 0.008884222 | -2.825 | Up |
| CYTH4    | 1.061 | 8.429  | 2.894 | 0.004189587 | 0.009256934 | -2.863 | Up |
| TP73     | 1.348 | 4.189  | 2.858 | 0.004672775 | 0.010203254 | -2.962 | Up |
| CHD2     | 1.546 | 7.892  | 2.849 | 0.004796593 | 0.010442949 | -2.986 | Up |
| FCHSD2   | 1.536 | 8.012  | 2.840 | 0.004938621 | 0.010705144 | -3.012 | Up |
| USP36    | 1.382 | 6.898  | 2.834 | 0.005025748 | 0.010878148 | -3.028 | Up |
| GEMIN7   | 1.175 | 7.288  | 2.833 | 0.005040951 | 0.010879382 | -3.031 | Up |
| ADAMTS5  | 1.099 | 7.861  | 2.822 | 0.005213886 | 0.011221787 | -3.061 | Up |
| CSRNP3   | 1.517 | 4.670  | 2.822 | 0.005214697 | 0.011221787 | -3.061 | Up |
| CLN6     | 2.444 | 6.326  | 2.819 | 0.005257807 | 0.011281904 | -3.068 | Up |
| MAOB     | 2.486 | 7.612  | 2.785 | 0.005818428 | 0.012360003 | -3.160 | Up |
| RNF170   | 1.272 | 7.026  | 2.777 | 0.005948827 | 0.012601006 | -3.180 | Up |
| NT5E     | 1.842 | 6.726  | 2.735 | 0.006738714 | 0.014123822 | -3.292 | Up |
| PSIP1    | 1.072 | 9.581  | 2.717 | 0.007108234 | 0.014786712 | -3.339 | Up |
| MS4A4A   | 1.658 | 8.141  | 2.717 | 0.007109952 | 0.014786712 | -3.340 | Up |
| ERAP2    | 2.127 | 7.049  | 2.703 | 0.007397102 | 0.015298318 | -3.375 | Up |
| ITGB8    | 1.163 | 7.222  | 2.700 | 0.007469078 | 0.01542572  | -3.384 | Up |
| PTPN21   | 1.392 | 6.435  | 2.675 | 0.008042947 | 0.016473639 | -3.450 | Up |
| TRPV6    | 1.818 | 5.798  | 2.647 | 0.008717397 | 0.017732928 | -3.522 | Up |
| MAGIX    | 1.686 | 5.184  | 2.632 | 0.009094087 | 0.01842358  | -3.559 | Up |
| PTPRM    | 1.251 | 8.398  | 2.594 | 0.010120787 | 0.020364831 | -3.655 | Up |
| PHKG2    | 1.000 | 8.320  | 2.587 | 0.010309814 | 0.020717154 | -3.671 | Up |
| SLC8A1   | 1.564 | 6.958  | 2.574 | 0.010694094 | 0.021431425 | -3.703 | Up |
| ACSL4    | 1.459 | 6.929  | 2.561 | 0.011115622 | 0.022220962 | -3.738 | Up |
| ARHGAP19 | 1.399 | 6.238  | 2.478 | 0.013958082 | 0.027490951 | -3.939 | Up |
| C1S      | 2.119 | 10.774 | 2.473 | 0.014142498 | 0.027780575 | -3.950 | Up |
| ANO1     | 1.701 | 7.148  | 2.471 | 0.014217863 | 0.02789177  | -3.955 | Up |
| BRWD1    | 1.298 | 7.141  | 2.451 | 0.015018992 | 0.029308716 | -4.003 | Up |
| EMP1     | 1.733 | 9.480  | 2.441 | 0.015447197 | 0.030065422 | -4.028 | Up |
| FUT8     | 1.760 | 7.342  | 2.438 | 0.015538997 | 0.030204561 | -4.033 | Up |
| VASH2    | 1.626 | 7.224  | 2.431 | 0.01583754  | 0.030695017 | -4.050 | Up |
| PDK4     | 1.519 | 6.068  | 2.431 | 0.015853243 | 0.030695017 | -4.051 | Up |
| CALML4   | 1.263 | 7.579  | 2.428 | 0.015968387 | 0.030814096 | -4.057 | Up |
| SCEL     | 1.925 | 3.691  | 2.427 | 0.016039065 | 0.030893898 | -4.061 | Up |

|          |        |        |        |             |             |        |       |
|----------|--------|--------|--------|-------------|-------------|--------|-------|
| LAMA3    | 1.591  | 6.285  | 2.422  | 0.01624159  | 0.031243524 | -4.072 | Up    |
| SOX4     | 1.107  | 11.581 | 2.413  | 0.016622984 | 0.031935888 | -4.092 | Up    |
| PTGFR    | 1.859  | 4.512  | 2.404  | 0.017037782 | 0.032606411 | -4.114 | Up    |
| FGD6     | 1.291  | 6.992  | 2.363  | 0.018974797 | 0.036035151 | -4.208 | Up    |
| PRR16    | 1.952  | 4.462  | 2.333  | 0.020529448 | 0.03878944  | -4.277 | Up    |
| MBNL2    | 1.328  | 9.205  | 2.323  | 0.021099694 | 0.039816302 | -4.300 | Up    |
| BAHCC1   | 1.295  | 6.838  | 2.318  | 0.02135965  | 0.040153982 | -4.311 | Up    |
| SAMD14   | 1.008  | 6.050  | 2.315  | 0.021517621 | 0.040399109 | -4.317 | Up    |
| CDC25A   | 1.175  | 6.410  | 2.314  | 0.021602361 | 0.040456815 | -4.321 | Up    |
| CLIP1    | 1.042  | 8.877  | 2.311  | 0.021736644 | 0.040657093 | -4.326 | Up    |
| SYF2     | 1.045  | 8.969  | 2.302  | 0.022288784 | 0.041530761 | -4.348 | Up    |
| MPHOSPH9 | 1.823  | 5.364  | 2.300  | 0.022363984 | 0.041569056 | -4.351 | Up    |
| PRMT5    | 1.147  | 9.185  | 2.292  | 0.022847322 | 0.042308802 | -4.369 | Up    |
| PRKAA1   | 1.316  | 6.444  | 2.264  | 0.024550838 | 0.045126201 | -4.432 | Up    |
| PIP4K2B  | 0.899  | 9.003  | 4.486  | 1.17E-05    | 4.36E-05    | 2.630  | NoSig |
| C11orf57 | -0.929 | 8.951  | -4.325 | 2.31E-05    | 8.15E-05    | 1.980  | NoSig |
| ADAMTS9  | -0.933 | 8.585  | -4.077 | 6.37E-05    | 0.00021148  | 1.021  | NoSig |
| SSH1     | -0.773 | 9.183  | -4.048 | 7.13E-05    | 0.000234583 | 0.914  | NoSig |
| MAN1A2   | -0.846 | 10.158 | -3.982 | 9.29E-05    | 0.000300229 | 0.665  | NoSig |
| FUS      | -0.782 | 10.732 | -3.939 | 0.000109716 | 0.000347863 | 0.508  | NoSig |
| KLHL18   | -0.850 | 9.015  | -3.830 | 0.000167195 | 0.000513676 | 0.113  | NoSig |
| ZNF75D   | 0.925  | 8.046  | 3.826  | 0.000169651 | 0.000520148 | 0.099  | NoSig |
| NFX1     | -0.956 | 9.280  | -3.784 | 0.000198807 | 0.000602089 | -0.050 | NoSig |
| TMEM134  | 0.839  | 9.496  | 3.782  | 0.000200231 | 0.00060517  | -0.056 | NoSig |
| TPCN1    | 0.898  | 9.352  | 3.765  | 0.000213298 | 0.000640755 | -0.116 | NoSig |
| TBC1D1   | -0.914 | 9.387  | -3.762 | 0.000215919 | 0.000647321 | -0.127 | NoSig |
| VPS13D   | -0.745 | 8.738  | -3.726 | 0.000246788 | 0.000728122 | -0.252 | NoSig |
| TATDN2   | -0.880 | 9.837  | -3.663 | 0.000311658 | 0.000908696 | -0.470 | NoSig |
| WFS1     | -0.812 | 9.213  | -3.654 | 0.000322746 | 0.000935523 | -0.503 | NoSig |
| ATP5SL   | 0.816  | 9.434  | 3.650  | 0.000327214 | 0.000944792 | -0.516 | NoSig |
| FBXO28   | -0.912 | 9.686  | -3.624 | 0.000359956 | 0.001019533 | -0.605 | NoSig |
| TRIOBP   | -0.973 | 10.058 | -3.487 | 0.000589048 | 0.001622064 | -1.063 | NoSig |
| WBSCR16  | -0.832 | 8.978  | -3.454 | 0.000661212 | 0.001790933 | -1.170 | NoSig |
| TPR      | -0.884 | 11.386 | -3.442 | 0.000689838 | 0.001849669 | -1.209 | NoSig |
| DDX3X    | -0.958 | 11.351 | -3.442 | 0.000690568 | 0.001849669 | -1.210 | NoSig |
| MINA     | -0.890 | 9.224  | -3.378 | 0.00086133  | 0.002243077 | -1.415 | NoSig |
| RUNX1T1  | -0.987 | 8.685  | -3.363 | 0.000909854 | 0.00235706  | -1.466 | NoSig |
| SREK1    | -0.737 | 9.347  | -3.354 | 0.000937265 | 0.002423849 | -1.493 | NoSig |
| FRYL     | -0.978 | 9.625  | -3.350 | 0.00094885  | 0.002445304 | -1.504 | NoSig |
| PVR      | -0.721 | 8.613  | -3.297 | 0.001138232 | 0.002893249 | -1.672 | NoSig |
| RANGAP1  | -0.902 | 8.821  | -3.285 | 0.001186002 | 0.002989126 | -1.710 | NoSig |
| PARVA    | 0.747  | 8.450  | 3.275  | 0.001227316 | 0.003077603 | -1.742 | NoSig |
| FGF1     | -0.915 | 7.729  | -3.270 | 0.001247301 | 0.003113649 | -1.757 | NoSig |
| SF1      | 0.701  | 10.409 | 3.263  | 0.001275351 | 0.003171315 | -1.777 | NoSig |
| PIGQ     | 0.951  | 7.534  | 3.262  | 0.001282507 | 0.003183787 | -1.782 | NoSig |

|          |        |        |        |             |             |        |       |
|----------|--------|--------|--------|-------------|-------------|--------|-------|
| RHEB     | -0.944 | 12.090 | -3.216 | 0.001496567 | 0.00368443  | -1.924 | NoSig |
| PGPEP1   | -0.655 | 8.525  | -3.135 | 0.001954438 | 0.004725609 | -2.169 | NoSig |
| ARHGEF7  | -0.711 | 9.818  | -3.099 | 0.002196488 | 0.005259545 | -2.276 | NoSig |
| SCRN3    | 0.954  | 6.993  | 3.093  | 0.002239968 | 0.005346439 | -2.294 | NoSig |
| TROAP    | 0.775  | 9.177  | 3.077  | 0.002355215 | 0.005594577 | -2.340 | NoSig |
| SAE1     | 0.655  | 10.385 | 3.071  | 0.00240237  | 0.005697487 | -2.358 | NoSig |
| MTMR11   | 0.974  | 8.846  | 3.060  | 0.002486177 | 0.005868167 | -2.389 | NoSig |
| TM2D1    | 0.883  | 9.068  | 3.048  | 0.002583355 | 0.00606864  | -2.424 | NoSig |
| YIF1B    | 0.829  | 7.803  | 3.042  | 0.002633512 | 0.006176707 | -2.442 | NoSig |
| GDAP2    | -0.633 | 8.085  | -3.025 | 0.002780631 | 0.006460622 | -2.491 | NoSig |
| BBX      | 0.725  | 9.457  | 2.990  | 0.003108249 | 0.007143687 | -2.593 | NoSig |
| SYNCRIP  | -0.810 | 11.540 | -2.983 | 0.00317033  | 0.007275124 | -2.611 | NoSig |
| PMS1     | -0.782 | 9.328  | -2.968 | 0.003322309 | 0.007577107 | -2.653 | NoSig |
| PRKAB2   | 0.653  | 8.663  | 2.947  | 0.00354937  | 0.008037046 | -2.713 | NoSig |
| PBLD     | -0.960 | 7.176  | -2.944 | 0.003582238 | 0.008058681 | -2.722 | NoSig |
| TRIM44   | -0.954 | 9.773  | -2.936 | 0.003670514 | 0.0082076   | -2.744 | NoSig |
| ORAI2    | 0.819  | 8.145  | 2.892  | 0.004206513 | 0.00928054  | -2.867 | NoSig |
| ACP1     | -0.830 | 10.630 | -2.888 | 0.004257639 | 0.009379421 | -2.878 | NoSig |
| ABI1     | 0.856  | 9.931  | 2.887  | 0.004269813 | 0.009392325 | -2.881 | NoSig |
| FAM178A  | -0.745 | 7.894  | -2.885 | 0.004294946 | 0.009433656 | -2.886 | NoSig |
| CHD1L    | -0.871 | 10.597 | -2.877 | 0.004411066 | 0.00966017  | -2.910 | NoSig |
| FBXO7    | -0.903 | 11.382 | -2.867 | 0.004539322 | 0.00992643  | -2.936 | NoSig |
| TTC23    | -0.755 | 8.261  | -2.833 | 0.005036743 | 0.010879382 | -3.030 | NoSig |
| PSMD10   | -0.837 | 10.389 | -2.820 | 0.00524306  | 0.011266517 | -3.066 | NoSig |
| ARID5B   | -0.847 | 10.360 | -2.805 | 0.00547268  | 0.011699815 | -3.105 | NoSig |
| DLGAP4   | 0.626  | 8.021  | 2.782  | 0.005866074 | 0.01244344  | -3.167 | NoSig |
| RMND1    | -0.871 | 7.590  | -2.765 | 0.006169163 | 0.013030604 | -3.212 | NoSig |
| CLASP2   | 0.831  | 8.382  | 2.763  | 0.006217009 | 0.013113038 | -3.219 | NoSig |
| HIPK1    | 0.728  | 9.111  | 2.754  | 0.006385868 | 0.013450121 | -3.243 | NoSig |
| DCAF8    | -0.582 | 9.171  | -2.747 | 0.006508596 | 0.013689225 | -3.260 | NoSig |
| KIAA0226 | 0.634  | 8.923  | 2.741  | 0.006623674 | 0.013911587 | -3.276 | NoSig |
| OGDH     | -0.715 | 8.630  | -2.730 | 0.006847234 | 0.014320446 | -3.306 | NoSig |
| SNAPC5   | -0.844 | 9.494  | -2.721 | 0.007032032 | 0.014679999 | -3.330 | NoSig |
| FBXO42   | 0.869  | 8.123  | 2.720  | 0.007038897 | 0.014679999 | -3.331 | NoSig |
| TM2D3    | 0.729  | 10.739 | 2.714  | 0.007161619 | 0.014873362 | -3.346 | NoSig |
| PIGK     | 0.837  | 8.236  | 2.705  | 0.007368038 | 0.015280716 | -3.372 | NoSig |
| USP25    | -0.557 | 10.027 | -2.704 | 0.007379031 | 0.015282199 | -3.373 | NoSig |
| PPARA    | 0.947  | 6.974  | 2.698  | 0.007510135 | 0.015489003 | -3.389 | NoSig |
| TSC22D4  | 0.720  | 7.848  | 2.695  | 0.007575847 | 0.015602887 | -3.396 | NoSig |
| SMC3     | 0.829  | 9.067  | 2.694  | 0.007600433 | 0.015631873 | -3.399 | NoSig |
| NAP1L1   | -0.832 | 11.783 | -2.667 | 0.008211953 | 0.016796662 | -3.468 | NoSig |
| DDX6     | 0.869  | 7.911  | 2.649  | 0.008647863 | 0.017625591 | -3.515 | NoSig |
| PDE8B    | -0.890 | 8.038  | -2.645 | 0.008745148 | 0.017765075 | -3.525 | NoSig |
| RCBTB1   | 0.796  | 7.511  | 2.633  | 0.009057513 | 0.018374518 | -3.556 | NoSig |
| RNF130   | 0.745  | 10.293 | 2.620  | 0.009404626 | 0.019026773 | -3.589 | NoSig |



|           |        |        |        |             |             |        |       |
|-----------|--------|--------|--------|-------------|-------------|--------|-------|
| WDR78     | -0.719 | 7.298  | -2.550 | 0.011463178 | 0.022880195 | -3.765 | NoSig |
| CRYZL1    | -0.869 | 8.177  | -2.545 | 0.011602411 | 0.023096098 | -3.776 | NoSig |
| ITGB1     | 0.811  | 12.693 | 2.540  | 0.011760309 | 0.023379116 | -3.788 | NoSig |
| PGLS      | 0.760  | 9.649  | 2.523  | 0.012339077 | 0.02449694  | -3.830 | NoSig |
| MAF       | 0.996  | 8.136  | 2.505  | 0.012964725 | 0.025704728 | -3.874 | NoSig |
| SLC30A5   | 0.817  | 8.468  | 2.484  | 0.013749089 | 0.027151255 | -3.926 | NoSig |
| ZNF7      | 0.894  | 8.448  | 2.480  | 0.013898362 | 0.027409635 | -3.935 | NoSig |
| MKL1      | -0.591 | 8.552  | -2.474 | 0.01410568  | 0.027744903 | -3.948 | NoSig |
| SKIV2L2   | 0.620  | 9.190  | 2.456  | 0.01483936  | 0.029034379 | -3.993 | NoSig |
| RBBP6     | 0.589  | 9.693  | 2.453  | 0.014953494 | 0.029219244 | -3.999 | NoSig |
| MLLT10    | 0.594  | 8.761  | 2.442  | 0.015388657 | 0.029990737 | -4.025 | NoSig |
| SYNE2     | -0.816 | 9.383  | -2.434 | 0.015731049 | 0.03053795  | -4.044 | NoSig |
| PDXK      | 0.868  | 10.585 | 2.429  | 0.015926463 | 0.030796685 | -4.055 | NoSig |
| KAT6A     | -0.759 | 10.214 | -2.409 | 0.01681132  | 0.032256042 | -4.102 | NoSig |
| MAP3K2    | 0.572  | 8.003  | 2.409  | 0.016836437 | 0.032262606 | -4.104 | NoSig |
| AVL9      | -0.942 | 8.732  | -2.373 | 0.018515936 | 0.035298969 | -4.187 | NoSig |
| BTN2A2    | 0.558  | 9.126  | 2.365  | 0.018885388 | 0.035911217 | -4.204 | NoSig |
| MITF      | 0.690  | 7.837  | 2.341  | 0.020101599 | 0.038077806 | -4.258 | NoSig |
| RIN3      | -0.875 | 8.404  | -2.333 | 0.020521492 | 0.03878944  | -4.276 | NoSig |
| C14orf159 | 0.932  | 8.034  | 2.319  | 0.021309009 | 0.04010949  | -4.309 | NoSig |
| CSAD      | -0.863 | 7.966  | -2.308 | 0.0219325   | 0.040971894 | -4.334 | NoSig |
| PRR14     | -0.506 | 10.162 | -2.304 | 0.022122753 | 0.041275451 | -4.342 | NoSig |
| ATG2B     | 0.927  | 7.386  | 2.301  | 0.022315453 | 0.041530761 | -4.349 | NoSig |
| OSMR      | -0.839 | 7.729  | -2.297 | 0.022526365 | 0.041818608 | -4.357 | NoSig |
| RNF103    | -0.746 | 9.720  | -2.294 | 0.022758379 | 0.042196645 | -4.366 | NoSig |
| WWP2      | -0.804 | 9.295  | -2.291 | 0.022928623 | 0.042406545 | -4.373 | NoSig |
| ABHD11    | 0.810  | 9.800  | 2.282  | 0.023427357 | 0.04327513  | -4.391 | NoSig |
| ENTPD4    | -0.794 | 9.088  | -2.271 | 0.024110094 | 0.04448103  | -4.416 | NoSig |
| MYO16     | -0.914 | 4.434  | -2.266 | 0.024420685 | 0.044958933 | -4.427 | NoSig |
| DDX10     | 0.693  | 9.262  | 2.259  | 0.024828046 | 0.045523187 | -4.441 | NoSig |
| ERC1      | -0.527 | 9.071  | -2.246 | 0.025671807 | 0.047012286 | -4.470 | NoSig |
| UBTF      | -0.828 | 8.257  | -2.237 | 0.026294119 | 0.048061022 | -4.491 | NoSig |
| MKNK1     | -0.571 | 9.505  | -2.227 | 0.026932176 | 0.049138829 | -4.512 | NoSig |
| RABGAP1L  | 0.898  | 9.235  | 2.219  | 0.027477671 | 0.050011379 | -4.529 | NoSig |
| RPS6KA5   | 1.011  | 7.960  | 2.218  | 0.027540123 | 0.050063768 | -4.531 | NoSig |
| PCSK6     | -0.917 | 7.651  | -2.214 | 0.027848379 | 0.050562319 | -4.540 | NoSig |
| UBE3C     | -0.604 | 9.545  | -2.213 | 0.027903802 | 0.050601162 | -4.542 | NoSig |
| GRK4      | -0.992 | 6.461  | -2.212 | 0.028003427 | 0.050719971 | -4.545 | NoSig |
| GPR173    | -1.147 | 6.055  | -2.210 | 0.028161891 | 0.050944929 | -4.550 | NoSig |
| SLC9A5    | 1.090  | 6.446  | 2.203  | 0.028602905 | 0.051679855 | -4.563 | NoSig |
| MAPK12    | -0.970 | 7.214  | -2.203 | 0.028660359 | 0.051720817 | -4.565 | NoSig |
| FANCC     | -0.592 | 9.074  | -2.201 | 0.028804559 | 0.051918035 | -4.569 | NoSig |
| CNTN1     | -0.986 | 7.720  | -2.196 | 0.029130286 | 0.052441568 | -4.579 | NoSig |
| C4orf27   | 0.764  | 9.349  | 2.193  | 0.029357205 | 0.052786172 | -4.586 | NoSig |
| DDX31     | 1.040  | 6.128  | 2.187  | 0.02981763  | 0.053549295 | -4.599 | NoSig |

|          |        |        |        |             |             |        |       |
|----------|--------|--------|--------|-------------|-------------|--------|-------|
| KLK8     | 1.254  | 8.550  | 2.186  | 0.029883029 | 0.053602007 | -4.601 | NoSig |
| ETS1     | 1.167  | 7.394  | 2.180  | 0.030293412 | 0.054253777 | -4.613 | NoSig |
| UCHL1    | 1.531  | 9.462  | 2.180  | 0.03031936  | 0.054253777 | -4.613 | NoSig |
| LAPTM4B  | -1.012 | 12.664 | -2.178 | 0.030496389 | 0.054504964 | -4.618 | NoSig |
| BAP1     | -0.696 | 8.868  | -2.172 | 0.030952424 | 0.055253607 | -4.631 | NoSig |
| CNR1     | -1.107 | 6.353  | -2.169 | 0.031148111 | 0.055511777 | -4.636 | NoSig |
| SHB      | -0.710 | 8.800  | -2.169 | 0.031171711 | 0.055511777 | -4.637 | NoSig |
| SPTLC1   | -0.783 | 10.238 | -2.168 | 0.031262931 | 0.05560763  | -4.640 | NoSig |
| ABCB9    | -1.206 | 6.370  | -2.167 | 0.031329962 | 0.055660279 | -4.641 | NoSig |
| IKZF2    | 1.287  | 6.959  | 2.165  | 0.031424242 | 0.055761155 | -4.644 | NoSig |
| PTK6     | 1.715  | 5.192  | 2.162  | 0.031708081 | 0.056197755 | -4.652 | NoSig |
| UNC5C    | -1.219 | 5.639  | -2.151 | 0.032535612 | 0.057518023 | -4.674 | NoSig |
| CD209    | -0.694 | 7.874  | -2.151 | 0.032554241 | 0.057518023 | -4.674 | NoSig |
| MEX3C    | 1.322  | 8.127  | 2.151  | 0.032569049 | 0.057518023 | -4.675 | NoSig |
| SCARF1   | 1.068  | 6.285  | 2.150  | 0.032666113 | 0.057549205 | -4.677 | NoSig |
| TRIM36   | 1.207  | 5.600  | 2.150  | 0.032667891 | 0.057549205 | -4.677 | NoSig |
| SNX19    | 1.025  | 7.954  | 2.149  | 0.03273765  | 0.057549205 | -4.679 | NoSig |
| FCER1G   | -0.882 | 10.648 | -2.149 | 0.032741511 | 0.057549205 | -4.679 | NoSig |
| ZBTB40   | 0.736  | 8.752  | 2.144  | 0.033163722 | 0.058222496 | -4.690 | NoSig |
| COL9A1   | 1.252  | 4.733  | 2.132  | 0.034111549 | 0.059815888 | -4.714 | NoSig |
| NBEAL2   | 0.795  | 8.018  | 2.118  | 0.035307905 | 0.061840818 | -4.744 | NoSig |
| C2CD3    | 0.522  | 8.486  | 2.114  | 0.035621914 | 0.062317395 | -4.751 | NoSig |
| HNRNPM   | 0.711  | 11.876 | 2.110  | 0.036024194 | 0.062947093 | -4.761 | NoSig |
| STAB1    | -0.682 | 9.531  | -2.107 | 0.036228904 | 0.063230492 | -4.765 | NoSig |
| PHIP     | 1.097  | 9.514  | 2.105  | 0.036410128 | 0.063472286 | -4.770 | NoSig |
| DYRK3    | 0.915  | 7.601  | 2.105  | 0.036460734 | 0.063486078 | -4.771 | NoSig |
| ST18     | 1.434  | 3.639  | 2.097  | 0.037166988 | 0.06464013  | -4.787 | NoSig |
| SLC33A1  | -0.594 | 9.108  | -2.095 | 0.037304164 | 0.064802911 | -4.790 | NoSig |
| LIG3     | -0.746 | 8.434  | -2.088 | 0.037954864 | 0.06585634  | -4.805 | NoSig |
| HSPA4L   | -0.915 | 7.320  | -2.082 | 0.038528865 | 0.066774385 | -4.818 | NoSig |
| PLA2G4C  | 1.053  | 7.742  | 2.078  | 0.038828055 | 0.067214572 | -4.824 | NoSig |
| ZMYM6    | -0.829 | 8.281  | -2.062 | 0.040408005 | 0.06986826  | -4.858 | NoSig |
| SLC39A14 | 0.958  | 9.484  | 2.060  | 0.040572543 | 0.07007128  | -4.861 | NoSig |
| CARD8    | -0.622 | 8.544  | -2.054 | 0.041116048 | 0.070927568 | -4.873 | NoSig |
| NDUFS4   | 0.660  | 9.565  | 2.052  | 0.041323309 | 0.071202503 | -4.877 | NoSig |
| MYLK     | 1.580  | 8.878  | 2.052  | 0.041385925 | 0.07122786  | -4.878 | NoSig |
| DNAJC2   | 0.878  | 9.783  | 2.045  | 0.042024551 | 0.07224336  | -4.891 | NoSig |
| CLK4     | -0.548 | 9.234  | -2.041 | 0.042455626 | 0.072900134 | -4.900 | NoSig |
| CSF3R    | -1.329 | 7.553  | -2.039 | 0.042652559 | 0.073153813 | -4.904 | NoSig |
| SRC      | 0.848  | 6.086  | 2.038  | 0.042757747 | 0.073249734 | -4.906 | NoSig |
| AREG     | 1.381  | 6.434  | 2.029  | 0.04362591  | 0.074651011 | -4.923 | NoSig |
| HEATR6   | 0.611  | 7.513  | 2.028  | 0.043716795 | 0.074720546 | -4.924 | NoSig |
| TAF2     | -0.650 | 9.922  | -2.028 | 0.043795359 | 0.074768885 | -4.926 | NoSig |
| SUZ12    | 0.581  | 10.035 | 2.025  | 0.044107777 | 0.0752159   | -4.932 | NoSig |
| ATP5O    | 0.863  | 11.788 | 2.023  | 0.044262577 | 0.075393416 | -4.935 | NoSig |

|          |        |        |        |             |             |        |       |
|----------|--------|--------|--------|-------------|-------------|--------|-------|
| CEP68    | -0.450 | 8.855  | -2.022 | 0.044386524 | 0.075518033 | -4.937 | NoSig |
| MARK1    | 0.653  | 8.034  | 2.014  | 0.045180005 | 0.076780191 | -4.952 | NoSig |
| LUZP1    | -1.027 | 8.182  | -2.013 | 0.04533243  | 0.076939478 | -4.955 | NoSig |
| RBM6     | 0.492  | 9.237  | 2.013  | 0.045377217 | 0.076939478 | -4.956 | NoSig |
| KCTD17   | 0.972  | 6.066  | 2.006  | 0.046041563 | 0.077976999 | -4.968 | NoSig |
| YTHDC2   | -0.760 | 8.284  | -2.002 | 0.046542783 | 0.078736199 | -4.977 | NoSig |
| CDK12    | -0.651 | 8.033  | -1.998 | 0.046924382 | 0.07929154  | -4.984 | NoSig |
| MFAP3    | -0.681 | 8.431  | -1.995 | 0.047264839 | 0.079776181 | -4.990 | NoSig |
| RGS13    | -1.424 | 5.501  | -1.994 | 0.047418241 | 0.079944358 | -4.993 | NoSig |
| CARD14   | 0.679  | 7.811  | 1.985  | 0.048374408 | 0.081464036 | -5.010 | NoSig |
| NRP2     | -0.585 | 8.098  | -1.983 | 0.048615524 | 0.081777471 | -5.014 | NoSig |
| CUX2     | -1.111 | 5.424  | -1.976 | 0.049435592 | 0.083062967 | -5.028 | NoSig |
| UROS     | -0.574 | 8.765  | -1.975 | 0.049530433 | 0.08312839  | -5.029 | NoSig |
| SPAG9    | -0.514 | 9.241  | -1.964 | 0.050815544 | 0.085109262 | -5.051 | NoSig |
| ARMC8    | -0.503 | 9.032  | -1.964 | 0.050825168 | 0.085109262 | -5.051 | NoSig |
| HERC6    | 1.089  | 8.580  | 1.960  | 0.051219443 | 0.085641585 | -5.057 | NoSig |
| EAF2     | 0.978  | 7.436  | 1.960  | 0.051258245 | 0.085641585 | -5.058 | NoSig |
| PHKA2    | 0.777  | 8.498  | 1.959  | 0.051404068 | 0.085788832 | -5.060 | NoSig |
| APOL6    | 0.804  | 9.178  | 1.946  | 0.052908091 | 0.088199923 | -5.084 | NoSig |
| TFB2M    | 0.788  | 9.245  | 1.946  | 0.052978052 | 0.088217653 | -5.086 | NoSig |
| FYCO1    | 0.539  | 7.937  | 1.945  | 0.053094983 | 0.088313468 | -5.087 | NoSig |
| SMPDL3A  | 0.759  | 8.001  | 1.940  | 0.053663781 | 0.089159825 | -5.096 | NoSig |
| PPIL6    | 0.920  | 4.746  | 1.929  | 0.054997204 | 0.091273261 | -5.117 | NoSig |
| TBC1D8B  | -0.598 | 8.083  | -1.928 | 0.055198077 | 0.091504504 | -5.120 | NoSig |
| ULK2     | 0.512  | 7.807  | 1.914  | 0.056958451 | 0.094317613 | -5.146 | NoSig |
| PDGFRA   | 1.332  | 7.500  | 1.907  | 0.057765048 | 0.09554686  | -5.157 | NoSig |
| MTHFD2L  | -0.997 | 6.234  | -1.903 | 0.058395995 | 0.09648316  | -5.166 | NoSig |
| DDX50    | 0.644  | 9.745  | 1.897  | 0.059110057 | 0.097554556 | -5.177 | NoSig |
| TCTN1    | 0.606  | 8.520  | 1.894  | 0.059588462 | 0.09823508  | -5.183 | NoSig |
| RALGAPA1 | 0.890  | 8.103  | 1.892  | 0.05975125  | 0.098394362 | -5.185 | NoSig |
| SIM2     | -1.005 | 7.406  | -1.888 | 0.060278597 | 0.099152958 | -5.193 | NoSig |
| DZANK1   | 1.078  | 6.884  | 1.887  | 0.060484122 | 0.099381093 | -5.196 | NoSig |
| ATP9B    | 0.728  | 7.546  | 1.883  | 0.060988471 | 0.100099179 | -5.202 | NoSig |
| GFOD1    | 0.519  | 9.350  | 1.875  | 0.062105308 | 0.101819838 | -5.217 | NoSig |
| MPDU1    | 1.021  | 7.569  | 1.869  | 0.06299895  | 0.103171187 | -5.229 | NoSig |
| RPE      | 0.706  | 7.898  | 1.863  | 0.063733517 | 0.104220042 | -5.239 | NoSig |
| INPP4B   | 0.929  | 6.407  | 1.863  | 0.063779582 | 0.104220042 | -5.239 | NoSig |
| CALCOCO2 | -0.523 | 9.676  | -1.861 | 0.064087064 | 0.104607534 | -5.243 | NoSig |
| CPEB3    | 1.287  | 5.223  | 1.857  | 0.064657707 | 0.105423257 | -5.251 | NoSig |
| MKS1     | -0.499 | 7.965  | -1.853 | 0.065155733 | 0.106048211 | -5.257 | NoSig |
| PERP     | 0.964  | 10.542 | 1.853  | 0.065183635 | 0.106048211 | -5.257 | NoSig |
| BIN3     | 0.492  | 8.769  | 1.850  | 0.065596433 | 0.106603165 | -5.262 | NoSig |
| PACS2    | -0.431 | 8.841  | -1.849 | 0.065816278 | 0.106843674 | -5.265 | NoSig |
| SNX13    | -0.429 | 8.906  | -1.842 | 0.066795169 | 0.108314522 | -5.277 | NoSig |
| PARK2    | -0.932 | 6.444  | -1.840 | 0.067107459 | 0.108702388 | -5.281 | NoSig |

|          |        |        |        |             |             |        |       |
|----------|--------|--------|--------|-------------|-------------|--------|-------|
| ARPC5    | -0.387 | 12.204 | -1.831 | 0.068406131 | 0.110685437 | -5.297 | NoSig |
| OSGIN2   | 0.604  | 8.097  | 1.825  | 0.069288276 | 0.111990942 | -5.307 | NoSig |
| RNF216   | -0.461 | 8.468  | -1.824 | 0.069427344 | 0.112093877 | -5.309 | NoSig |
| RGS5     | 1.215  | 7.731  | 1.819  | 0.070262872 | 0.113319838 | -5.319 | NoSig |
| FKBP15   | -0.399 | 9.794  | -1.818 | 0.070480901 | 0.11354832  | -5.321 | NoSig |
| HINT1    | 0.517  | 12.865 | 1.816  | 0.070745423 | 0.113851129 | -5.324 | NoSig |
| GABRG2   | -1.024 | 6.346  | -1.807 | 0.072043405 | 0.115814641 | -5.339 | NoSig |
| EPB41    | 1.463  | 4.948  | 1.789  | 0.074925017 | 0.120316955 | -5.371 | NoSig |
| SETD6    | 0.961  | 8.160  | 1.786  | 0.075464137 | 0.12085378  | -5.377 | NoSig |
| ANKFY1   | 0.380  | 8.342  | 1.786  | 0.075547679 | 0.12085378  | -5.378 | NoSig |
| CTNND2   | 0.869  | 6.614  | 1.785  | 0.075575092 | 0.12085378  | -5.378 | NoSig |
| PAX7     | 0.775  | 4.530  | 1.785  | 0.075584908 | 0.12085378  | -5.378 | NoSig |
| BEND5    | -0.570 | 7.142  | -1.785 | 0.075665682 | 0.12085378  | -5.379 | NoSig |
| HDAC4    | 0.747  | 7.390  | 1.783  | 0.07589202  | 0.121085229 | -5.382 | NoSig |
| ARHGAP25 | 0.791  | 8.768  | 1.782  | 0.076156956 | 0.1213777   | -5.385 | NoSig |
| RABEPK   | 0.626  | 8.670  | 1.780  | 0.076408    | 0.121522712 | -5.387 | NoSig |
| COL1A1   | 1.630  | 11.520 | 1.780  | 0.076529543 | 0.121522712 | -5.389 | NoSig |
| STK24    | -1.101 | 11.463 | -1.779 | 0.076560631 | 0.121522712 | -5.389 | NoSig |
| SART3    | -0.563 | 9.074  | -1.779 | 0.076574836 | 0.121522712 | -5.389 | NoSig |
| C19orf26 | 1.076  | 2.981  | 1.773  | 0.077579734 | 0.122986209 | -5.400 | NoSig |
| NRP1     | 1.105  | 7.812  | 1.767  | 0.078646569 | 0.124544673 | -5.411 | NoSig |
| ST7L     | 0.949  | 6.080  | 1.764  | 0.079191986 | 0.125274982 | -5.416 | NoSig |
| DISC1    | 0.661  | 6.983  | 1.754  | 0.08086647  | 0.127787928 | -5.433 | NoSig |
| TXLNG    | 0.698  | 7.314  | 1.743  | 0.08269399  | 0.130537117 | -5.451 | NoSig |
| MLXIP    | 0.499  | 9.269  | 1.739  | 0.083445999 | 0.131584517 | -5.459 | NoSig |
| FLCN     | 0.929  | 7.364  | 1.737  | 0.083794048 | 0.131993379 | -5.462 | NoSig |
| PAK2     | 0.464  | 9.338  | 1.732  | 0.084626963 | 0.133164333 | -5.470 | NoSig |
| ITFG1    | -0.502 | 9.535  | -1.731 | 0.084923707 | 0.133490014 | -5.473 | NoSig |
| MMP2     | -1.019 | 9.081  | -1.729 | 0.0852632   | 0.133882131 | -5.476 | NoSig |
| SNRPB2   | -0.798 | 10.385 | -1.724 | 0.086067608 | 0.135002672 | -5.484 | NoSig |
| VSTM4    | 0.884  | 4.154  | 1.716  | 0.087614821 | 0.137284762 | -5.498 | NoSig |
| CRTAP    | -0.548 | 8.993  | -1.712 | 0.088261739 | 0.138152848 | -5.504 | NoSig |
| GPR37L1  | 0.895  | 4.797  | 1.711  | 0.088564131 | 0.138480402 | -5.507 | NoSig |
| ARSB     | -0.580 | 7.236  | -1.709 | 0.088913985 | 0.138881403 | -5.510 | NoSig |
| MUC6     | 1.278  | 6.272  | 1.706  | 0.089390884 | 0.139479795 | -5.514 | NoSig |
| IL12RB1  | 0.731  | 5.745  | 1.704  | 0.089728899 | 0.139860453 | -5.517 | NoSig |
| GINS4    | -0.800 | 7.457  | -1.700 | 0.090522225 | 0.140949266 | -5.524 | NoSig |
| MAGI1    | -0.601 | 8.302  | -1.696 | 0.091359878 | 0.142104747 | -5.532 | NoSig |
| SCN8A    | 0.727  | 3.811  | 1.694  | 0.091658935 | 0.142420936 | -5.534 | NoSig |
| TRAPPC2  | -0.519 | 8.094  | -1.689 | 0.092718043 | 0.143693454 | -5.543 | NoSig |
| LPP      | -0.537 | 10.227 | -1.688 | 0.092753317 | 0.143693454 | -5.544 | NoSig |
| PTPN7    | -0.520 | 8.750  | -1.688 | 0.092767798 | 0.143693454 | -5.544 | NoSig |
| SLC4A1AP | 0.356  | 9.429  | 1.687  | 0.092992331 | 0.143891359 | -5.546 | NoSig |
| HPRT1    | -0.841 | 10.226 | -1.682 | 0.0939247   | 0.145182982 | -5.554 | NoSig |
| UBR4     | 0.785  | 9.429  | 1.680  | 0.094334867 | 0.145665574 | -5.557 | NoSig |

|         |        |        |        |             |             |        |       |
|---------|--------|--------|--------|-------------|-------------|--------|-------|
| ABCA8   | -1.041 | 5.675  | -1.678 | 0.094814017 | 0.146253571 | -5.561 | NoSig |
| ADAM15  | 1.161  | 7.429  | 1.674  | 0.095545187 | 0.147228698 | -5.567 | NoSig |
| COCH    | -1.354 | 8.151  | -1.673 | 0.095700425 | 0.14731525  | -5.569 | NoSig |
| GRIK2   | -0.608 | 4.010  | -1.669 | 0.096443713 | 0.148305896 | -5.575 | NoSig |
| ZNF292  | -0.599 | 9.375  | -1.665 | 0.09723978  | 0.149375571 | -5.582 | NoSig |
| LGALS3  | -1.040 | 11.952 | -1.663 | 0.097693148 | 0.149917143 | -5.585 | NoSig |
| PRKD3   | -0.645 | 8.720  | -1.662 | 0.098008063 | 0.15024535  | -5.588 | NoSig |
| ZNF286A | -0.647 | 7.875  | -1.660 | 0.098382703 | 0.150664345 | -5.591 | NoSig |
| ATXN1   | -0.716 | 8.442  | -1.657 | 0.09888561  | 0.151278706 | -5.595 | NoSig |
| SLC2A11 | 0.985  | 6.013  | 1.654  | 0.099464641 | 0.152008141 | -5.600 | NoSig |
| P2RY10  | -0.931 | 6.097  | -1.648 | 0.100839447 | 0.153950983 | -5.610 | NoSig |
| RPS6KA2 | -0.414 | 8.696  | -1.647 | 0.101060993 | 0.154130971 | -5.612 | NoSig |
| BCL10   | -0.675 | 8.917  | -1.644 | 0.101593875 | 0.154784931 | -5.616 | NoSig |
| AMN     | 0.698  | 7.711  | 1.641  | 0.102127224 | 0.155438262 | -5.621 | NoSig |
| TBL3    | -0.831 | 7.545  | -1.637 | 0.102982601 | 0.156579885 | -5.627 | NoSig |
| RSRC1   | -0.442 | 8.895  | -1.632 | 0.104164605 | 0.158215289 | -5.636 | NoSig |
| VIM     | 0.936  | 13.257 | 1.630  | 0.104464373 | 0.158455717 | -5.638 | NoSig |
| ARMCX5  | 0.558  | 7.907  | 1.630  | 0.104536018 | 0.158455717 | -5.639 | NoSig |
| CLDN15  | -0.811 | 7.198  | -1.629 | 0.104756462 | 0.158628165 | -5.641 | NoSig |
| SIM1    | -1.023 | 5.979  | -1.628 | 0.10498968  | 0.158661625 | -5.642 | NoSig |
| EPHA7   | -1.150 | 4.594  | -1.628 | 0.104991957 | 0.158661625 | -5.642 | NoSig |
| SLC9A1  | 0.827  | 6.240  | 1.626  | 0.105465803 | 0.159215888 | -5.646 | NoSig |
| EIF2B5  | -0.345 | 9.290  | -1.620 | 0.106696323 | 0.160910175 | -5.655 | NoSig |
| MCFD2   | -0.476 | 8.983  | -1.618 | 0.107065835 | 0.161303846 | -5.658 | NoSig |
| AFF3    | 1.202  | 4.198  | 1.613  | 0.108194301 | 0.16268198  | -5.666 | NoSig |
| FRY     | 0.853  | 7.077  | 1.613  | 0.10819938  | 0.16268198  | -5.666 | NoSig |
| ASXL2   | -0.293 | 9.737  | -1.604 | 0.110144584 | 0.165439391 | -5.680 | NoSig |
| ANKMY1  | 0.881  | 5.442  | 1.603  | 0.110449244 | 0.165729593 | -5.683 | NoSig |
| PTCH1   | -0.736 | 7.362  | -1.601 | 0.110871337 | 0.16619524  | -5.686 | NoSig |
| MBNL1   | 0.504  | 10.930 | 1.594  | 0.112453159 | 0.168243087 | -5.697 | NoSig |
| HDGFRP3 | 0.601  | 8.339  | 1.594  | 0.112463772 | 0.168243087 | -5.697 | NoSig |
| PTPRB   | 0.883  | 5.826  | 1.581  | 0.115237751 | 0.172219634 | -5.716 | NoSig |
| MAK     | 0.936  | 5.240  | 1.579  | 0.115720002 | 0.17276671  | -5.719 | NoSig |
| IRAK3   | 1.068  | 5.594  | 1.578  | 0.115905895 | 0.172870678 | -5.720 | NoSig |
| FCRL2   | -0.754 | 7.053  | -1.578 | 0.116096319 | 0.172981189 | -5.722 | NoSig |
| GAB1    | -0.691 | 7.138  | -1.575 | 0.116769411 | 0.173809925 | -5.726 | NoSig |
| KDELRL1 | 0.734  | 9.517  | 1.565  | 0.119001774 | 0.17687659  | -5.741 | NoSig |
| SP1     | 1.028  | 7.067  | 1.565  | 0.119067563 | 0.17687659  | -5.742 | NoSig |
| SAR1B   | 0.565  | 8.926  | 1.561  | 0.119836942 | 0.177714062 | -5.747 | NoSig |
| VPS37C  | 0.555  | 9.725  | 1.561  | 0.119870346 | 0.177714062 | -5.747 | NoSig |
| DGKE    | 0.781  | 6.214  | 1.560  | 0.120136835 | 0.177931747 | -5.748 | NoSig |
| BECN1   | 0.465  | 9.508  | 1.551  | 0.122321488 | 0.180987118 | -5.763 | NoSig |
| SIK3    | 0.296  | 8.733  | 1.545  | 0.12365987  | 0.182721978 | -5.771 | NoSig |
| HIVEP1  | 0.447  | 7.577  | 1.545  | 0.123739766 | 0.182721978 | -5.772 | NoSig |
| GSTO1   | -0.341 | 11.578 | -1.535 | 0.126214259 | 0.186191074 | -5.787 | NoSig |

|         |        |        |        |             |             |        |       |
|---------|--------|--------|--------|-------------|-------------|--------|-------|
| IST1    | 0.405  | 10.684 | 1.532  | 0.127013543 | 0.187184478 | -5.792 | NoSig |
| ITPKB   | 0.871  | 8.139  | 1.522  | 0.129517221 | 0.190685254 | -5.807 | NoSig |
| PER3    | -0.650 | 7.877  | -1.518 | 0.130379076 | 0.191710374 | -5.812 | NoSig |
| PDZRN3  | 1.003  | 7.026  | 1.518  | 0.13047135  | 0.191710374 | -5.813 | NoSig |
| RPS9    | -0.982 | 12.465 | -1.515 | 0.131194716 | 0.192582964 | -5.817 | NoSig |
| STX16   | 0.388  | 10.554 | 1.511  | 0.132162607 | 0.193812423 | -5.823 | NoSig |
| DUOX1   | -0.836 | 6.652  | -1.510 | 0.132585336 | 0.194240783 | -5.825 | NoSig |
| FAM189B | 1.065  | 9.116  | 1.508  | 0.133025605 | 0.194693971 | -5.828 | NoSig |
| DDAH1   | -0.701 | 10.190 | -1.501 | 0.134696385 | 0.196945453 | -5.837 | NoSig |
| ZBTB24  | -0.516 | 8.855  | -1.500 | 0.135079984 | 0.197312315 | -5.839 | NoSig |
| TMED5   | -0.722 | 9.879  | -1.497 | 0.135864873 | 0.198264049 | -5.844 | NoSig |
| CDKN3   | -0.410 | 9.511  | -1.494 | 0.136717634 | 0.199242706 | -5.849 | NoSig |
| TCEA1   | -0.622 | 11.442 | -1.493 | 0.136803499 | 0.199242706 | -5.849 | NoSig |
| CA8     | 0.931  | 6.706  | 1.487  | 0.138440472 | 0.201429532 | -5.858 | NoSig |
| TUBGCP3 | 1.041  | 7.639  | 1.483  | 0.139387605 | 0.202609353 | -5.864 | NoSig |
| ZBTB38  | -0.482 | 9.537  | -1.477 | 0.141106204 | 0.20474735  | -5.873 | NoSig |
| NEK4    | 0.495  | 7.637  | 1.477  | 0.141133849 | 0.20474735  | -5.873 | NoSig |
| FGD2    | -0.743 | 7.705  | -1.471 | 0.142791016 | 0.206949552 | -5.882 | NoSig |
| TRDN    | -1.003 | 3.184  | -1.462 | 0.145031021 | 0.209991361 | -5.894 | NoSig |
| DHX30   | 0.271  | 9.453  | 1.461  | 0.145340852 | 0.210178555 | -5.896 | NoSig |
| SPP1    | -0.927 | 12.502 | -1.461 | 0.145442995 | 0.210178555 | -5.896 | NoSig |
| DPY19L4 | 0.431  | 8.733  | 1.456  | 0.146715399 | 0.211811455 | -5.903 | NoSig |
| MAST4   | 0.633  | 7.991  | 1.454  | 0.147277616 | 0.212416891 | -5.906 | NoSig |
| IGFBP5  | -1.174 | 10.474 | -1.449 | 0.148801467 | 0.214406766 | -5.914 | NoSig |
| ZSCAN5A | 0.580  | 7.015  | 1.440  | 0.151284546 | 0.217773591 | -5.926 | NoSig |
| MBP     | -0.555 | 9.241  | -1.439 | 0.151551012 | 0.217946185 | -5.928 | NoSig |
| ETV4    | 0.770  | 5.746  | 1.430  | 0.154230318 | 0.221585008 | -5.941 | NoSig |
| CSPP1   | -0.510 | 8.872  | -1.427 | 0.15504694  | 0.222543242 | -5.945 | NoSig |
| TAF11   | 0.383  | 9.263  | 1.421  | 0.156797795 | 0.224839269 | -5.953 | NoSig |
| CACNG5  | -0.784 | 5.517  | -1.414 | 0.158642749 | 0.227265672 | -5.962 | NoSig |
| GPNMB   | -0.749 | 11.785 | -1.409 | 0.160307188 | 0.229429055 | -5.970 | NoSig |
| BANK1   | 1.071  | 6.118  | 1.403  | 0.162132096 | 0.231817719 | -5.979 | NoSig |
| STEAP3  | 0.387  | 9.892  | 1.394  | 0.164732948 | 0.235310176 | -5.991 | NoSig |
| CEP70   | -0.442 | 8.617  | -1.392 | 0.165225838 | 0.23544075  | -5.993 | NoSig |
| ZNF41   | 0.917  | 5.093  | 1.392  | 0.165282116 | 0.23544075  | -5.993 | NoSig |
| ABCC5   | 0.489  | 9.622  | 1.392  | 0.165299357 | 0.23544075  | -5.993 | NoSig |
| ACAT1   | 0.464  | 10.235 | 1.391  | 0.165648824 | 0.235712728 | -5.995 | NoSig |
| PIIP5K1 | 0.698  | 6.359  | 1.381  | 0.16874795  | 0.239893118 | -6.009 | NoSig |
| RAP1A   | -0.694 | 9.689  | -1.376 | 0.170357317 | 0.241949694 | -6.016 | NoSig |
| CAD     | 0.424  | 9.258  | 1.373  | 0.171008916 | 0.242643376 | -6.019 | NoSig |
| TBC1D16 | 0.505  | 9.071  | 1.369  | 0.172361653 | 0.244329626 | -6.024 | NoSig |
| CTBP1   | 0.343  | 10.800 | 1.365  | 0.173588267 | 0.24583405  | -6.030 | NoSig |
| HEATR1  | -0.320 | 10.298 | -1.360 | 0.175065544 | 0.24769026  | -6.036 | NoSig |
| ZNF107  | 0.606  | 7.911  | 1.358  | 0.175773813 | 0.248455951 | -6.039 | NoSig |
| GTPBP3  | -0.328 | 9.653  | -1.352 | 0.17765687  | 0.25087917  | -6.047 | NoSig |

|          |        |        |        |             |             |        |       |
|----------|--------|--------|--------|-------------|-------------|--------|-------|
| TAGLN    | 1.123  | 10.038 | 1.348  | 0.178924174 | 0.252429076 | -6.052 | NoSig |
| NLGN4Y   | -0.839 | 4.778  | -1.342 | 0.18105068  | 0.255187073 | -6.061 | NoSig |
| LSM14B   | 0.871  | 6.679  | 1.341  | 0.181343618 | 0.255357916 | -6.062 | NoSig |
| RNF141   | 0.508  | 7.946  | 1.340  | 0.181654611 | 0.255553837 | -6.064 | NoSig |
| SERPINC1 | 0.534  | 4.050  | 1.339  | 0.181908466 | 0.255669083 | -6.065 | NoSig |
| SORBS2   | 1.053  | 8.350  | 1.337  | 0.182586855 | 0.25638022  | -6.067 | NoSig |
| KRT7     | -0.901 | 10.825 | -1.329 | 0.185292773 | 0.259934296 | -6.078 | NoSig |
| IQCA1    | 0.532  | 7.525  | 1.327  | 0.185788546 | 0.260384136 | -6.080 | NoSig |
| SRCAP    | 0.445  | 7.925  | 1.323  | 0.187101617 | 0.261738069 | -6.085 | NoSig |
| SQLE     | -0.525 | 10.396 | -1.323 | 0.187106636 | 0.261738069 | -6.085 | NoSig |
| C2orf72  | -0.610 | 7.060  | -1.319 | 0.188463075 | 0.263387776 | -6.091 | NoSig |
| EHBP1L1  | 0.475  | 7.894  | 1.318  | 0.188843951 | 0.263672258 | -6.092 | NoSig |
| CKAP5    | -0.379 | 10.041 | -1.312 | 0.190713055 | 0.266032188 | -6.099 | NoSig |
| ZHX2     | -0.578 | 8.796  | -1.310 | 0.191682066 | 0.267133301 | -6.103 | NoSig |
| SDC3     | -0.699 | 8.324  | -1.309 | 0.191950322 | 0.267256675 | -6.104 | NoSig |
| CRABP1   | 1.246  | 8.815  | 1.306  | 0.193028656 | 0.268506653 | -6.108 | NoSig |
| ENAH     | 0.487  | 10.634 | 1.302  | 0.194333855 | 0.270069572 | -6.113 | NoSig |
| ATF1     | -0.668 | 8.049  | -1.290 | 0.198345895 | 0.275387811 | -6.128 | NoSig |
| PLXND1   | 0.468  | 9.906  | 1.289  | 0.198769499 | 0.275409742 | -6.130 | NoSig |
| SRGN     | -0.764 | 11.284 | -1.289 | 0.198870102 | 0.275409742 | -6.130 | NoSig |
| WDR37    | 0.308  | 8.989  | 1.289  | 0.198917326 | 0.275409742 | -6.130 | NoSig |
| NEUROD1  | -0.728 | 4.745  | -1.285 | 0.200282441 | 0.277041851 | -6.135 | NoSig |
| RAG1     | 0.744  | 5.029  | 1.274  | 0.204109394 | 0.282073112 | -6.149 | NoSig |
| ALB      | 0.826  | 5.800  | 1.273  | 0.204404077 | 0.28221807  | -6.150 | NoSig |
| LRRK1    | 0.490  | 7.372  | 1.262  | 0.208184482 | 0.287170988 | -6.163 | NoSig |
| MOB3B    | 0.368  | 8.711  | 1.261  | 0.208597328 | 0.287473797 | -6.165 | NoSig |
| SERPINB5 | -1.092 | 8.211  | -1.258 | 0.209860486 | 0.288946799 | -6.169 | NoSig |
| MAP3K11  | -0.495 | 9.313  | -1.257 | 0.210243215 | 0.289205977 | -6.170 | NoSig |
| SNED1    | -0.491 | 7.534  | -1.255 | 0.210981148 | 0.289952835 | -6.173 | NoSig |
| PHC3     | 0.481  | 7.215  | 1.253  | 0.211438331 | 0.290312833 | -6.175 | NoSig |
| FAM188A  | 0.552  | 8.024  | 1.250  | 0.212697069 | 0.291771717 | -6.179 | NoSig |
| NFS1     | 0.282  | 8.906  | 1.246  | 0.213901239 | 0.293153127 | -6.183 | NoSig |
| RUFY2    | 0.648  | 6.598  | 1.239  | 0.216589802 | 0.29656449  | -6.192 | NoSig |
| PHTF2    | -0.370 | 8.759  | -1.236 | 0.217671344 | 0.297771194 | -6.195 | NoSig |
| LTBR     | 0.344  | 9.218  | 1.231  | 0.219638858 | 0.300186564 | -6.202 | NoSig |
| NBR2     | 0.833  | 5.279  | 1.230  | 0.220063755 | 0.300491096 | -6.203 | NoSig |
| EIF4G3   | 0.379  | 8.789  | 1.227  | 0.221019983 | 0.301519922 | -6.206 | NoSig |
| TFE3     | -0.519 | 8.516  | -1.226 | 0.221389968 | 0.301747829 | -6.208 | NoSig |
| PRR5L    | 0.660  | 6.423  | 1.220  | 0.223756178 | 0.304325556 | -6.215 | NoSig |
| KIFC3    | -0.431 | 7.749  | -1.220 | 0.223779799 | 0.304325556 | -6.215 | NoSig |
| C3orf52  | 0.630  | 6.628  | 1.220  | 0.223895198 | 0.304325556 | -6.216 | NoSig |
| UBA6     | -0.411 | 8.062  | -1.219 | 0.224203324 | 0.304466066 | -6.217 | NoSig |
| NCOA6    | 0.283  | 9.806  | 1.217  | 0.225024634 | 0.305302583 | -6.219 | NoSig |
| MPP6     | 0.852  | 6.017  | 1.214  | 0.226041568 | 0.306402746 | -6.222 | NoSig |
| PRUNE2   | -0.446 | 7.783  | -1.208 | 0.228391226 | 0.309305786 | -6.230 | NoSig |

|          |        |        |        |             |             |        |       |
|----------|--------|--------|--------|-------------|-------------|--------|-------|
| RNASET2  | -0.581 | 11.060 | -1.196 | 0.232891237 | 0.315113074 | -6.244 | NoSig |
| TACC1    | -0.421 | 10.513 | -1.192 | 0.23450242  | 0.316964372 | -6.248 | NoSig |
| CMTM6    | 0.782  | 10.561 | 1.192  | 0.234685793 | 0.316964372 | -6.249 | NoSig |
| LPGAT1   | -0.408 | 9.560  | -1.191 | 0.235050105 | 0.317168336 | -6.250 | NoSig |
| TGIF1    | -0.344 | 9.232  | -1.189 | 0.235788751 | 0.317876584 | -6.252 | NoSig |
| SH2D3C   | -0.354 | 7.402  | -1.183 | 0.238094298 | 0.320463599 | -6.259 | NoSig |
| CNPY3    | 0.713  | 7.960  | 1.183  | 0.23813872  | 0.320463599 | -6.259 | NoSig |
| NAV3     | 0.535  | 5.719  | 1.180  | 0.239331885 | 0.32177804  | -6.263 | NoSig |
| EIF4G2   | -0.621 | 12.143 | -1.176 | 0.24091472  | 0.32361354  | -6.267 | NoSig |
| ZMAT3    | -0.357 | 8.005  | -1.175 | 0.241225982 | 0.323715251 | -6.268 | NoSig |
| ARMCX4   | -0.525 | 4.664  | -1.174 | 0.24183996  | 0.323715251 | -6.270 | NoSig |
| PTPN11   | 0.475  | 10.243 | 1.173  | 0.242001204 | 0.323715251 | -6.271 | NoSig |
| RBMS3    | 0.506  | 7.757  | 1.173  | 0.242002798 | 0.323715251 | -6.271 | NoSig |
| OSBPL1A  | -0.344 | 9.489  | -1.173 | 0.242078923 | 0.323715251 | -6.271 | NoSig |
| GINS2    | 0.850  | 8.198  | 1.172  | 0.242319057 | 0.323745227 | -6.272 | NoSig |
| PSMD6    | -0.365 | 10.776 | -1.172 | 0.24254852  | 0.323760906 | -6.272 | NoSig |
| NKTR     | -0.353 | 10.307 | -1.170 | 0.243298406 | 0.324470609 | -6.274 | NoSig |
| DENND4A  | 0.830  | 5.794  | 1.166  | 0.244812914 | 0.326197852 | -6.279 | NoSig |
| ABI3BP   | 0.730  | 5.652  | 1.165  | 0.245082374 | 0.32626454  | -6.279 | NoSig |
| NDST2    | 0.331  | 8.348  | 1.164  | 0.24585789  | 0.327004189 | -6.282 | NoSig |
| FBN2     | -0.614 | 7.201  | -1.160 | 0.247389517 | 0.328747285 | -6.286 | NoSig |
| TXNL4A   | 0.375  | 11.289 | 1.155  | 0.249262804 | 0.330940883 | -6.291 | NoSig |
| VNN1     | 0.835  | 5.882  | 1.154  | 0.24956447  | 0.331045823 | -6.292 | NoSig |
| THADA    | 0.280  | 9.102  | 1.151  | 0.25093841  | 0.332571672 | -6.296 | NoSig |
| PAAF1    | 0.617  | 7.858  | 1.147  | 0.252552621 | 0.334412954 | -6.300 | NoSig |
| TNRC6B   | 0.425  | 8.004  | 1.143  | 0.254159303 | 0.336241    | -6.305 | NoSig |
| GNG4     | -0.542 | 8.324  | -1.142 | 0.25475597  | 0.33673078  | -6.306 | NoSig |
| BTG3     | 0.536  | 10.019 | 1.138  | 0.25623332  | 0.338382723 | -6.310 | NoSig |
| CLU      | 1.063  | 10.016 | 1.132  | 0.258888608 | 0.341585945 | -6.318 | NoSig |
| TSPAN3   | -0.390 | 10.262 | -1.128 | 0.260622126 | 0.343568352 | -6.322 | NoSig |
| CCDC69   | -0.816 | 6.459  | -1.124 | 0.262285647 | 0.345455055 | -6.327 | NoSig |
| ITGA9    | 0.494  | 7.058  | 1.120  | 0.263886079 | 0.347255398 | -6.331 | NoSig |
| NSMAF    | 0.300  | 9.564  | 1.118  | 0.264578877 | 0.34773339  | -6.333 | NoSig |
| PDZK1IP1 | 0.637  | 9.814  | 1.118  | 0.264717013 | 0.34773339  | -6.333 | NoSig |
| TMBIM4   | -0.327 | 9.832  | -1.107 | 0.269707755 | 0.353798223 | -6.346 | NoSig |
| TXNDC9   | -0.258 | 10.426 | -1.106 | 0.269809808 | 0.353798223 | -6.346 | NoSig |
| KIAA1107 | -0.358 | 6.869  | -1.106 | 0.270049057 | 0.353799954 | -6.347 | NoSig |
| C11orf63 | 0.555  | 6.153  | 1.098  | 0.273368713 | 0.35783387  | -6.355 | NoSig |
| SRRM2    | 0.424  | 11.802 | 1.094  | 0.275231266 | 0.35995505  | -6.360 | NoSig |
| ACOT11   | 0.497  | 6.911  | 1.093  | 0.27560598  | 0.360128376 | -6.361 | NoSig |
| CLEC2B   | -0.582 | 9.262  | -1.091 | 0.276668056 | 0.361198771 | -6.363 | NoSig |
| GPRIN2   | 0.361  | 8.924  | 1.089  | 0.277413186 | 0.361853866 | -6.365 | NoSig |
| FCER1A   | 0.576  | 6.200  | 1.087  | 0.278063384 | 0.362384095 | -6.367 | NoSig |
| HSPA6    | 0.530  | 9.429  | 1.083  | 0.280046994 | 0.364649633 | -6.371 | NoSig |
| MACROD1  | -0.512 | 8.328  | -1.075 | 0.283417024 | 0.368714886 | -6.379 | NoSig |



|           |        |        |        |             |             |        |       |
|-----------|--------|--------|--------|-------------|-------------|--------|-------|
| MCTS1     | 0.350  | 9.930  | 1.074  | 0.283929716 | 0.369058993 | -6.381 | NoSig |
| OTUB2     | -0.500 | 5.232  | -1.064 | 0.288354664 | 0.374483307 | -6.391 | NoSig |
| CLCC1     | 0.392  | 9.307  | 1.063  | 0.288813549 | 0.374599292 | -6.392 | NoSig |
| CCL5      | -0.556 | 10.034 | -1.063 | 0.288947806 | 0.374599292 | -6.393 | NoSig |
| ZNF12     | 0.409  | 8.696  | 1.061  | 0.289979688 | 0.375609578 | -6.395 | NoSig |
| TTL4      | -0.289 | 8.508  | -1.059 | 0.29057354  | 0.376051221 | -6.396 | NoSig |
| LRP1      | -0.341 | 7.700  | -1.057 | 0.291664367 | 0.377134708 | -6.399 | NoSig |
| RBPMS     | -0.578 | 8.908  | -1.049 | 0.295398638 | 0.381631428 | -6.407 | NoSig |
| POF1B     | -0.740 | 5.274  | -1.043 | 0.298134194 | 0.384700115 | -6.413 | NoSig |
| TTC37     | 0.271  | 8.371  | 1.043  | 0.298291347 | 0.384700115 | -6.414 | NoSig |
| DGKB      | -0.726 | 4.019  | -1.041 | 0.299011117 | 0.385019044 | -6.415 | NoSig |
| WWC1      | -0.298 | 9.228  | -1.041 | 0.299242023 | 0.385019044 | -6.416 | NoSig |
| ATAD2B    | 0.362  | 8.364  | 1.040  | 0.29931541  | 0.385019044 | -6.416 | NoSig |
| METTL17   | -0.490 | 9.303  | -1.033 | 0.302552804 | 0.388847035 | -6.423 | NoSig |
| ZBED1     | -0.325 | 9.030  | -1.032 | 0.30306061  | 0.389163322 | -6.424 | NoSig |
| RRP12     | 0.433  | 7.271  | 1.030  | 0.304027709 | 0.390068338 | -6.426 | NoSig |
| NLRP1     | 0.480  | 6.800  | 1.026  | 0.306067224 | 0.39180306  | -6.431 | NoSig |
| FAM53B    | 0.245  | 9.720  | 1.026  | 0.306097846 | 0.39180306  | -6.431 | NoSig |
| ST8SIA4   | -0.521 | 6.972  | -1.026 | 0.306170246 | 0.39180306  | -6.431 | NoSig |
| BCL2L13   | 0.261  | 8.867  | 1.020  | 0.308669476 | 0.39466166  | -6.437 | NoSig |
| SLC12A1   | -0.858 | 4.894  | -1.015 | 0.311267359 | 0.39742835  | -6.442 | NoSig |
| ATP5H     | 0.373  | 12.044 | 1.014  | 0.311477416 | 0.39742835  | -6.442 | NoSig |
| ASCC1     | -0.351 | 8.839  | -1.014 | 0.311635142 | 0.39742835  | -6.443 | NoSig |
| SOBP      | -0.509 | 7.800  | -1.010 | 0.313464534 | 0.399418819 | -6.447 | NoSig |
| SLAMF1    | 0.360  | 7.805  | 1.006  | 0.315415463 | 0.401560611 | -6.451 | NoSig |
| TEX10     | 0.205  | 9.679  | 1.005  | 0.31594867  | 0.401895357 | -6.452 | NoSig |
| TNNT2     | 0.524  | 5.980  | 1.003  | 0.31719501  | 0.40313588  | -6.454 | NoSig |
| ACAP2     | -0.369 | 9.093  | -0.999 | 0.318751125 | 0.404767654 | -6.458 | NoSig |
| MCF2L     | -0.308 | 9.374  | -0.999 | 0.319103785 | 0.404869734 | -6.458 | NoSig |
| UHRF1BP1L | 0.584  | 6.920  | 0.997  | 0.319787052 | 0.405206903 | -6.460 | NoSig |
| FILIP1L   | 0.437  | 8.369  | 0.996  | 0.320148788 | 0.405206903 | -6.460 | NoSig |
| IBA57     | 0.552  | 6.114  | 0.996  | 0.320422376 | 0.405206903 | -6.461 | NoSig |
| BTG1      | -0.373 | 10.968 | -0.996 | 0.320459528 | 0.405206903 | -6.461 | NoSig |
| NFYC      | 0.306  | 9.110  | 0.994  | 0.321413681 | 0.406068092 | -6.463 | NoSig |
| ATP5S     | 0.228  | 8.314  | 0.991  | 0.322565128 | 0.407176864 | -6.465 | NoSig |
| HS3ST3B1  | 0.479  | 6.818  | 0.983  | 0.326917875 | 0.412321358 | -6.474 | NoSig |
| CNOT7     | -0.298 | 10.799 | -0.974 | 0.331110348 | 0.417255159 | -6.482 | NoSig |
| RALGPS1   | 0.412  | 6.325  | 0.968  | 0.334020715 | 0.420555358 | -6.488 | NoSig |
| TPM1      | 0.458  | 11.448 | 0.968  | 0.334316538 | 0.420555358 | -6.489 | NoSig |
| MCOLN3    | -0.615 | 5.738  | -0.967 | 0.334577666 | 0.420555358 | -6.489 | NoSig |
| IREB2     | 0.360  | 7.079  | 0.966  | 0.334872401 | 0.420570321 | -6.490 | NoSig |
| SLC16A1   | -0.381 | 9.232  | -0.963 | 0.336514704 | 0.422276258 | -6.493 | NoSig |
| SPAG16    | 0.468  | 7.196  | 0.958  | 0.339024039 | 0.425066397 | -6.497 | NoSig |
| DDX42     | 0.277  | 10.405 | 0.954  | 0.341359873 | 0.427296319 | -6.502 | NoSig |
| BRD3      | -0.328 | 9.762  | -0.954 | 0.341377288 | 0.427296319 | -6.502 | NoSig |

|          |        |        |        |             |             |        |       |
|----------|--------|--------|--------|-------------|-------------|--------|-------|
| H6PD     | -0.414 | 7.497  | -0.947 | 0.344528072 | 0.430284427 | -6.508 | NoSig |
| ATF3     | 0.313  | 9.283  | 0.947  | 0.344623839 | 0.430284427 | -6.508 | NoSig |
| TIMM17B  | -0.485 | 8.876  | -0.947 | 0.344632651 | 0.430284427 | -6.508 | NoSig |
| SLC23A2  | -0.193 | 7.715  | -0.946 | 0.344938957 | 0.430305561 | -6.509 | NoSig |
| FKBP4    | -0.369 | 10.697 | -0.940 | 0.348388213 | 0.434244152 | -6.515 | NoSig |
| AGFG2    | -0.342 | 7.627  | -0.938 | 0.349114057 | 0.434784424 | -6.516 | NoSig |
| CFI      | 0.497  | 8.202  | 0.935  | 0.350628749 | 0.436305397 | -6.519 | NoSig |
| NAMPT    | -0.425 | 10.415 | -0.929 | 0.353760175 | 0.439769713 | -6.525 | NoSig |
| CHERP    | 0.345  | 9.729  | 0.929  | 0.354004268 | 0.439769713 | -6.525 | NoSig |
| NT5DC2   | -0.494 | 9.004  | -0.928 | 0.354571035 | 0.440106118 | -6.526 | NoSig |
| GGA1     | 0.392  | 11.256 | 0.927  | 0.355071688 | 0.440359966 | -6.527 | NoSig |
| UBE2I    | -0.297 | 11.091 | -0.922 | 0.357697176 | 0.442934401 | -6.531 | NoSig |
| TTC26    | -0.473 | 6.468  | -0.922 | 0.357743252 | 0.442934401 | -6.532 | NoSig |
| PTPRC    | -0.522 | 10.049 | -0.920 | 0.358677894 | 0.443722153 | -6.533 | NoSig |
| FAM184A  | 0.344  | 8.099  | 0.918  | 0.359374043 | 0.4442138   | -6.534 | NoSig |
| RPS24    | -0.387 | 14.428 | -0.907 | 0.36517343  | 0.451007384 | -6.544 | NoSig |
| UEVLD    | -0.317 | 7.518  | -0.905 | 0.366318833 | 0.451930215 | -6.546 | NoSig |
| INTS6    | 0.364  | 8.430  | 0.905  | 0.366528473 | 0.451930215 | -6.547 | NoSig |
| CRYBB2P1 | 0.490  | 6.756  | 0.901  | 0.368674045 | 0.454199093 | -6.550 | NoSig |
| C11orf58 | -0.371 | 10.933 | -0.900 | 0.369035365 | 0.454267871 | -6.551 | NoSig |
| PCDH9    | -0.510 | 6.125  | -0.893 | 0.372597533 | 0.458273393 | -6.557 | NoSig |
| WDR3     | 0.424  | 9.059  | 0.890  | 0.374184482 | 0.459844896 | -6.560 | NoSig |
| TTF2     | 0.381  | 6.987  | 0.884  | 0.377657905 | 0.463730227 | -6.565 | NoSig |
| KCNK1    | 0.397  | 9.414  | 0.877  | 0.381479508 | 0.468036328 | -6.571 | NoSig |
| G6PC     | -0.602 | 3.434  | -0.875 | 0.38244761  | 0.46883726  | -6.573 | NoSig |
| GGNBP2   | -0.309 | 9.356  | -0.872 | 0.384006227 | 0.469972416 | -6.575 | NoSig |
| TP63     | -0.410 | 7.878  | -0.872 | 0.384286193 | 0.469972416 | -6.576 | NoSig |
| DENND1B  | 0.272  | 8.361  | 0.872  | 0.384321761 | 0.469972416 | -6.576 | NoSig |
| C18orf25 | 0.264  | 7.893  | 0.869  | 0.385835744 | 0.471436114 | -6.578 | NoSig |
| WDR62    | 0.332  | 7.124  | 0.865  | 0.387753022 | 0.473389773 | -6.581 | NoSig |
| NFE2L2   | -0.256 | 10.217 | -0.864 | 0.388496878 | 0.473908825 | -6.583 | NoSig |
| CEP164   | -0.318 | 8.782  | -0.861 | 0.390204291 | 0.475601459 | -6.585 | NoSig |
| CYP39A1  | 0.643  | 5.844  | 0.856  | 0.392986728 | 0.478600544 | -6.589 | NoSig |
| ELAVL3   | -0.324 | 4.808  | -0.854 | 0.393911074 | 0.479333688 | -6.591 | NoSig |
| SYNRG    | -0.349 | 8.411  | -0.853 | 0.394416915 | 0.479556788 | -6.592 | NoSig |
| CAND1    | -0.335 | 8.954  | -0.847 | 0.397752875 | 0.48321775  | -6.597 | NoSig |
| C16orf45 | 0.371  | 7.277  | 0.844  | 0.399345728 | 0.484756814 | -6.599 | NoSig |
| TMEM135  | -0.441 | 7.445  | -0.841 | 0.401243759 | 0.486663515 | -6.602 | NoSig |
| PIKFYVE  | 0.374  | 7.932  | 0.839  | 0.402530438 | 0.487826211 | -6.604 | NoSig |
| PAK6     | 0.322  | 7.752  | 0.834  | 0.405338517 | 0.490605351 | -6.608 | NoSig |
| CDKL3    | 0.485  | 6.465  | 0.833  | 0.405483508 | 0.490605351 | -6.608 | NoSig |
| ADCY7    | 0.359  | 8.082  | 0.828  | 0.408555874 | 0.4939208   | -6.613 | NoSig |
| HOPX     | 0.458  | 7.998  | 0.827  | 0.409249306 | 0.494357204 | -6.614 | NoSig |
| RBM25    | -0.223 | 9.991  | -0.823 | 0.411366321 | 0.496511136 | -6.617 | NoSig |
| IPP      | -0.278 | 7.920  | -0.820 | 0.413324555 | 0.498470084 | -6.620 | NoSig |

|          |        |        |        |             |             |        |       |
|----------|--------|--------|--------|-------------|-------------|--------|-------|
| FGFR1OP  | -0.283 | 8.930  | -0.818 | 0.414281826 | 0.499219672 | -6.621 | NoSig |
| ITGBL1   | 0.353  | 7.733  | 0.816  | 0.415101986 | 0.49953993  | -6.622 | NoSig |
| GOLGA7   | -0.204 | 10.999 | -0.816 | 0.415219471 | 0.49953993  | -6.622 | NoSig |
| MTUS2    | 0.460  | 4.039  | 0.816  | 0.415624656 | 0.499623172 | -6.623 | NoSig |
| CEL      | 0.541  | 4.429  | 0.812  | 0.417410889 | 0.501365099 | -6.625 | NoSig |
| USPL1    | 0.185  | 8.529  | 0.805  | 0.42167721  | 0.50608072  | -6.631 | NoSig |
| COBL     | -0.613 | 8.214  | -0.798 | 0.425590134 | 0.510290604 | -6.637 | NoSig |
| IQCG     | -0.321 | 9.138  | -0.798 | 0.425871311 | 0.510290604 | -6.637 | NoSig |
| EPB41L4A | 0.384  | 5.585  | 0.794  | 0.428147705 | 0.512385289 | -6.640 | NoSig |
| WDR19    | -0.283 | 8.143  | -0.793 | 0.428385353 | 0.512385289 | -6.641 | NoSig |
| PDS5B    | 0.243  | 8.846  | 0.793  | 0.428653194 | 0.512385289 | -6.641 | NoSig |
| TRMT61A  | -0.285 | 8.272  | -0.792 | 0.429399216 | 0.512502117 | -6.642 | NoSig |
| TMEM144  | -0.408 | 5.487  | -0.792 | 0.42944024  | 0.512502117 | -6.642 | NoSig |
| CBR4     | 0.259  | 8.246  | 0.787  | 0.432251665 | 0.515344074 | -6.646 | NoSig |
| DNAJB9   | -0.179 | 10.294 | -0.786 | 0.432554557 | 0.515344074 | -6.646 | NoSig |
| DET1     | 0.176  | 8.252  | 0.786  | 0.432969359 | 0.515344074 | -6.647 | NoSig |
| CD79B    | 0.460  | 6.527  | 0.785  | 0.433207863 | 0.515344074 | -6.647 | NoSig |
| NLGN4X   | -0.600 | 5.254  | -0.784 | 0.433997043 | 0.515870186 | -6.648 | NoSig |
| PTPRS    | 0.475  | 5.312  | 0.782  | 0.435032167 | 0.516687566 | -6.650 | NoSig |
| CHRNA10  | -0.222 | 7.159  | -0.780 | 0.436245853 | 0.517715549 | -6.651 | NoSig |
| NAA16    | -0.213 | 8.284  | -0.777 | 0.438059008 | 0.519452747 | -6.654 | NoSig |
| MKL2     | 0.168  | 9.387  | 0.776  | 0.438466453 | 0.519521606 | -6.654 | NoSig |
| SSBP2    | 0.232  | 7.956  | 0.774  | 0.439572181 | 0.520417065 | -6.655 | NoSig |
| SMTN     | 0.365  | 8.333  | 0.773  | 0.440073716 | 0.520596353 | -6.656 | NoSig |
| ALG5     | 0.410  | 9.823  | 0.761  | 0.44732173  | 0.52874993  | -6.665 | NoSig |
| MRPS27   | -0.246 | 8.933  | -0.751 | 0.453597842 | 0.535607937 | -6.673 | NoSig |
| SMOX     | 0.362  | 8.078  | 0.750  | 0.453843981 | 0.535607937 | -6.674 | NoSig |
| CMAHP    | -0.306 | 7.783  | -0.749 | 0.454388865 | 0.535680919 | -6.674 | NoSig |
| PTPRE    | 0.290  | 8.657  | 0.749  | 0.454626308 | 0.535680919 | -6.675 | NoSig |
| LPAR6    | -0.316 | 8.748  | -0.747 | 0.456153201 | 0.537054482 | -6.676 | NoSig |
| ELMO2    | 0.199  | 7.927  | 0.743  | 0.45823107  | 0.539074051 | -6.679 | NoSig |
| ALOX15B  | -0.417 | 7.475  | -0.740 | 0.459961385 | 0.540681881 | -6.681 | NoSig |
| PRMT1    | -0.351 | 10.657 | -0.731 | 0.465327814 | 0.546158083 | -6.688 | NoSig |
| ATP6V1H  | -0.225 | 9.835  | -0.731 | 0.465354601 | 0.546158083 | -6.688 | NoSig |
| CCDC132  | 0.418  | 6.484  | 0.730  | 0.466016089 | 0.546503095 | -6.688 | NoSig |
| TFAP2B   | 0.800  | 6.221  | 0.725  | 0.469450373 | 0.549783019 | -6.692 | NoSig |
| INPP5B   | -0.375 | 6.879  | -0.723 | 0.470330077 | 0.549783019 | -6.694 | NoSig |
| RGS12    | 0.185  | 8.074  | 0.723  | 0.470419312 | 0.549783019 | -6.694 | NoSig |
| PRPSAP1  | 0.181  | 10.140 | 0.723  | 0.470741995 | 0.549783019 | -6.694 | NoSig |
| PSEN1    | -0.164 | 9.433  | -0.722 | 0.471115594 | 0.549783019 | -6.694 | NoSig |
| TPM4     | 0.403  | 11.394 | 0.722  | 0.471119596 | 0.549783019 | -6.694 | NoSig |
| STRAP    | 0.223  | 11.745 | 0.721  | 0.471401042 | 0.549783019 | -6.695 | NoSig |
| RSU1     | -0.318 | 10.193 | -0.720 | 0.472434384 | 0.550215123 | -6.696 | NoSig |
| TUBA1B   | 0.565  | 13.659 | 0.720  | 0.472511575 | 0.550215123 | -6.696 | NoSig |
| RAF1     | -0.144 | 10.276 | -0.719 | 0.47298395  | 0.55033422  | -6.697 | NoSig |

|            |        |        |        |             |             |        |       |
|------------|--------|--------|--------|-------------|-------------|--------|-------|
| KLHL35     | -0.303 | 7.351  | -0.718 | 0.473518978 | 0.550525974 | -6.697 | NoSig |
| EPHB3      | 0.390  | 9.699  | 0.717  | 0.473997284 | 0.550651532 | -6.698 | NoSig |
| PIK3IP1    | -0.301 | 8.660  | -0.716 | 0.475005292 | 0.551391779 | -6.699 | NoSig |
| KCNMB1     | -0.269 | 8.752  | -0.714 | 0.476199829 | 0.552347227 | -6.700 | NoSig |
| RPAP3      | -0.260 | 8.232  | -0.701 | 0.484201641 | 0.561190834 | -6.709 | NoSig |
| ZNF230     | 0.375  | 6.000  | 0.698  | 0.485927289 | 0.562752242 | -6.711 | NoSig |
| TOR1A      | -0.287 | 8.732  | -0.691 | 0.49009     | 0.567131385 | -6.716 | NoSig |
| ZNF26      | -0.187 | 8.625  | -0.688 | 0.492004006 | 0.568903544 | -6.718 | NoSig |
| ERGIC3     | -0.387 | 10.543 | -0.684 | 0.494438838 | 0.571274711 | -6.721 | NoSig |
| PDE12      | 0.453  | 6.481  | 0.682  | 0.495704648 | 0.572292556 | -6.722 | NoSig |
| RAD51B     | -0.242 | 6.620  | -0.681 | 0.496571345 | 0.572848402 | -6.723 | NoSig |
| DNAJC7     | 0.201  | 9.482  | 0.677  | 0.499040371 | 0.575250412 | -6.726 | NoSig |
| ANXA2      | 0.327  | 13.283 | 0.676  | 0.499508602 | 0.575344145 | -6.726 | NoSig |
| CDH19      | 0.512  | 6.271  | 0.674  | 0.500923302 | 0.576527051 | -6.728 | NoSig |
| HSD17B4    | 0.244  | 9.490  | 0.670  | 0.50371401  | 0.57929059  | -6.730 | NoSig |
| PEX2       | 0.200  | 9.250  | 0.665  | 0.506570763 | 0.582125753 | -6.733 | NoSig |
| PTK7       | -0.308 | 8.727  | -0.658 | 0.510930746 | 0.58668264  | -6.738 | NoSig |
| FCGR2A     | -0.305 | 9.174  | -0.649 | 0.517023718 | 0.593220886 | -6.744 | NoSig |
| EMID1      | -0.385 | 7.362  | -0.645 | 0.519277288 | 0.595347206 | -6.746 | NoSig |
| SLC22A7    | -0.322 | 6.208  | -0.644 | 0.520010341 | 0.595728334 | -6.747 | NoSig |
| SLC29A2    | -0.318 | 7.003  | -0.644 | 0.52048467  | 0.595812705 | -6.748 | NoSig |
| CLDN11     | 0.258  | 7.484  | 0.638  | 0.524286326 | 0.599702898 | -6.751 | NoSig |
| GIGYF2     | 0.129  | 9.578  | 0.635  | 0.525790389 | 0.600961036 | -6.753 | NoSig |
| JRKL       | -0.293 | 7.803  | -0.629 | 0.529741642 | 0.605012152 | -6.757 | NoSig |
| ST6GALNAC5 | 0.272  | 7.777  | 0.627  | 0.531002538 | 0.60598678  | -6.758 | NoSig |
| CAPRN2     | 0.196  | 8.764  | 0.626  | 0.532174945 | 0.606859006 | -6.759 | NoSig |
| HS1BP3     | 0.210  | 9.032  | 0.625  | 0.532891953 | 0.607210984 | -6.760 | NoSig |
| GCLC       | -0.208 | 8.776  | -0.621 | 0.534987199 | 0.609131673 | -6.761 | NoSig |
| HEXA       | -0.229 | 9.617  | -0.619 | 0.536438653 | 0.610316968 | -6.763 | NoSig |
| RPS15      | -0.373 | 13.631 | -0.595 | 0.552747586 | 0.628391178 | -6.778 | NoSig |
| TAPBP      | 0.217  | 11.091 | 0.593  | 0.553773396 | 0.629076425 | -6.779 | NoSig |
| AKAP12     | -0.364 | 7.014  | -0.589 | 0.55655753  | 0.631461315 | -6.781 | NoSig |
| LLGL2      | -0.179 | 8.857  | -0.589 | 0.556722114 | 0.631461315 | -6.781 | NoSig |
| PARP11     | 0.334  | 6.273  | 0.582  | 0.561267612 | 0.636131813 | -6.785 | NoSig |
| C5orf28    | 0.219  | 7.673  | 0.580  | 0.562814632 | 0.637399359 | -6.786 | NoSig |
| KIAA1109   | 0.203  | 8.391  | 0.578  | 0.563801847 | 0.63756229  | -6.787 | NoSig |
| FGFR4      | -0.350 | 6.200  | -0.578 | 0.563816013 | 0.63756229  | -6.787 | NoSig |
| GTF3C3     | 0.176  | 8.636  | 0.576  | 0.564891951 | 0.638293565 | -6.788 | NoSig |
| RBL1       | 0.217  | 6.789  | 0.574  | 0.566559504 | 0.639691711 | -6.790 | NoSig |
| SFXN3      | 0.166  | 8.190  | 0.556  | 0.5789261   | 0.653158657 | -6.800 | NoSig |
| PABPC1     | -0.278 | 14.264 | -0.551 | 0.582001337 | 0.656130393 | -6.802 | NoSig |
| KLHL3      | 0.241  | 7.204  | 0.549  | 0.58356304  | 0.657392607 | -6.804 | NoSig |
| MEIS1      | 0.192  | 7.573  | 0.544  | 0.587092965 | 0.660868463 | -6.806 | NoSig |
| NAALAD2    | -0.377 | 3.919  | -0.543 | 0.587677563 | 0.661026124 | -6.807 | NoSig |
| OSBP       | -0.124 | 9.396  | -0.541 | 0.588790012 | 0.661776831 | -6.808 | NoSig |

|          |        |        |        |             |             |        |       |
|----------|--------|--------|--------|-------------|-------------|--------|-------|
| PIGG     | 0.129  | 9.342  | 0.538  | 0.59129634  | 0.664091886 | -6.810 | NoSig |
| G3BP1    | -0.167 | 10.222 | -0.532 | 0.595573552 | 0.668390846 | -6.813 | NoSig |
| SEMA6A   | -0.136 | 7.921  | -0.526 | 0.599166757 | 0.671193486 | -6.816 | NoSig |
| MCTP2    | 0.167  | 7.744  | 0.526  | 0.599193766 | 0.671193486 | -6.816 | NoSig |
| ECM2     | 0.189  | 7.689  | 0.526  | 0.599424983 | 0.671193486 | -6.816 | NoSig |
| MYCBP2   | 0.186  | 9.790  | 0.524  | 0.600603643 | 0.672007237 | -6.817 | NoSig |
| PIEZO1   | 0.282  | 9.417  | 0.520  | 0.603528836 | 0.674772466 | -6.819 | NoSig |
| PALLD    | 0.229  | 10.842 | 0.513  | 0.608320636 | 0.679618922 | -6.823 | NoSig |
| KLK2     | -0.243 | 5.925  | -0.512 | 0.60890082  | 0.679756396 | -6.823 | NoSig |
| CENPI    | -0.206 | 6.643  | -0.510 | 0.610317758 | 0.680607063 | -6.824 | NoSig |
| CTNNB1   | -0.170 | 11.149 | -0.510 | 0.610578226 | 0.680607063 | -6.824 | NoSig |
| DNAJA4   | 0.147  | 9.593  | 0.508  | 0.611718683 | 0.681367552 | -6.825 | NoSig |
| PGD      | 0.289  | 9.173  | 0.506  | 0.613272986 | 0.682587522 | -6.826 | NoSig |
| TSGA10   | 0.250  | 6.474  | 0.501  | 0.616544939 | 0.685716025 | -6.828 | NoSig |
| HEMK1    | -0.127 | 8.106  | -0.500 | 0.617636859 | 0.686417047 | -6.829 | NoSig |
| SMCHD1   | 0.188  | 9.364  | 0.497  | 0.61952536  | 0.688001651 | -6.831 | NoSig |
| EEF1A1   | 0.364  | 14.942 | 0.493  | 0.622753099 | 0.691070044 | -6.833 | NoSig |
| PDE1A    | -0.236 | 6.238  | -0.491 | 0.624049054 | 0.691991755 | -6.834 | NoSig |
| STAU2    | -0.129 | 8.266  | -0.489 | 0.625222618 | 0.692776477 | -6.834 | NoSig |
| CBX3     | 0.115  | 11.968 | 0.486  | 0.627476658 | 0.69449506  | -6.836 | NoSig |
| DPYD     | 0.204  | 7.640  | 0.486  | 0.627707707 | 0.69449506  | -6.836 | NoSig |
| MORN1    | 0.256  | 4.596  | 0.483  | 0.629708393 | 0.696190618 | -6.838 | NoSig |
| GTF2H5   | -0.154 | 9.767  | -0.480 | 0.632041576 | 0.698250983 | -6.839 | NoSig |
| FN1      | -0.313 | 12.424 | -0.478 | 0.633210567 | 0.699023098 | -6.840 | NoSig |
| MTHFSD   | -0.198 | 7.819  | -0.474 | 0.635651953 | 0.700986518 | -6.842 | NoSig |
| DAAM1    | 0.210  | 8.664  | 0.474  | 0.635931952 | 0.700986518 | -6.842 | NoSig |
| FAR2     | -0.366 | 7.174  | -0.471 | 0.637963678 | 0.702705177 | -6.843 | NoSig |
| DIXDC1   | 0.260  | 6.543  | 0.469  | 0.639266473 | 0.703618982 | -6.844 | NoSig |
| DBF4B    | 0.210  | 6.663  | 0.467  | 0.641005136 | 0.705010826 | -6.845 | NoSig |
| DPY19L1  | 0.202  | 7.600  | 0.464  | 0.643073183 | 0.706454963 | -6.846 | NoSig |
| CYP4B1   | -0.367 | 5.299  | -0.464 | 0.643268339 | 0.706454963 | -6.847 | NoSig |
| GIN1     | 0.122  | 7.714  | 0.458  | 0.647541261 | 0.710622771 | -6.849 | NoSig |
| ACAN     | -0.267 | 8.315  | -0.454 | 0.649915302 | 0.712616275 | -6.851 | NoSig |
| SAMSN1   | 0.225  | 8.064  | 0.454  | 0.650316264 | 0.712616275 | -6.851 | NoSig |
| CLSPN    | 0.254  | 5.779  | 0.449  | 0.653850271 | 0.715961231 | -6.853 | NoSig |
| CD6      | 0.222  | 8.628  | 0.447  | 0.655452329 | 0.717187353 | -6.854 | NoSig |
| GPR126   | -0.191 | 8.151  | -0.443 | 0.65820677  | 0.719671667 | -6.856 | NoSig |
| DOPEY1   | -0.106 | 8.341  | -0.435 | 0.663749061 | 0.725198276 | -6.859 | NoSig |
| KDSR     | 0.104  | 9.494  | 0.431  | 0.666623384 | 0.727803945 | -6.861 | NoSig |
| RFX4     | -0.238 | 3.620  | -0.428 | 0.668906215 | 0.729760486 | -6.862 | NoSig |
| WFDC2    | 0.240  | 8.970  | 0.420  | 0.674709601 | 0.735552182 | -6.866 | NoSig |
| SLC4A8   | 0.269  | 4.666  | 0.418  | 0.676262669 | 0.736705193 | -6.867 | NoSig |
| SUPT6H   | -0.090 | 9.463  | -0.416 | 0.677764511 | 0.737800752 | -6.867 | NoSig |
| FRAS1    | -0.178 | 7.326  | -0.412 | 0.680688677 | 0.74044189  | -6.869 | NoSig |
| SERPINE1 | 0.233  | 5.943  | 0.408  | 0.683525369 | 0.742984082 | -6.871 | NoSig |

|          |        |        |        |             |             |        |       |
|----------|--------|--------|--------|-------------|-------------|--------|-------|
| CD44     | -0.163 | 11.948 | -0.401 | 0.688903561 | 0.748283122 | -6.874 | NoSig |
| MRPL23   | 0.167  | 9.087  | 0.395  | 0.693164336 | 0.752361582 | -6.876 | NoSig |
| DNASE1L3 | -0.132 | 7.032  | -0.388 | 0.698506427 | 0.757606898 | -6.879 | NoSig |
| CELF1    | -0.092 | 11.038 | -0.375 | 0.707955335 | 0.766830557 | -6.884 | NoSig |
| MYNN     | 0.087  | 8.079  | 0.375  | 0.708041933 | 0.766830557 | -6.884 | NoSig |
| MAD2L1   | 0.160  | 9.093  | 0.372  | 0.710108271 | 0.768034164 | -6.885 | NoSig |
| SPG11    | 0.134  | 8.942  | 0.372  | 0.710186264 | 0.768034164 | -6.885 | NoSig |
| P4HB     | -0.115 | 12.989 | -0.360 | 0.719425624 | 0.777460685 | -6.889 | NoSig |
| GATM     | 0.181  | 7.522  | 0.357  | 0.721436974 | 0.779068105 | -6.890 | NoSig |
| PTGS2    | 0.255  | 6.092  | 0.354  | 0.723843963 | 0.781100126 | -6.891 | NoSig |
| KDM4C    | 0.074  | 8.960  | 0.352  | 0.725178487 | 0.781972741 | -6.892 | NoSig |
| PPP2R5C  | 0.100  | 9.831  | 0.344  | 0.731477898 | 0.788193938 | -6.895 | NoSig |
| TRIM52   | 0.139  | 7.850  | 0.339  | 0.734585236 | 0.790969041 | -6.896 | NoSig |
| PHF21A   | -0.151 | 8.159  | -0.326 | 0.744960931 | 0.801347629 | -6.901 | NoSig |
| CYB5R1   | 0.120  | 9.843  | 0.325  | 0.745301796 | 0.801347629 | -6.901 | NoSig |
| TLR4     | 0.110  | 8.215  | 0.323  | 0.746929115 | 0.802517048 | -6.902 | NoSig |
| DNAJA3   | 0.060  | 10.468 | 0.317  | 0.751818795 | 0.806682842 | -6.904 | NoSig |
| MYO10    | 0.132  | 9.884  | 0.315  | 0.75274145  | 0.806682842 | -6.904 | NoSig |
| CD96     | 0.136  | 6.886  | 0.315  | 0.752814324 | 0.806682842 | -6.904 | NoSig |
| STIM1    | -0.068 | 8.280  | -0.315 | 0.752976318 | 0.806682842 | -6.904 | NoSig |
| UBE2G2   | 0.166  | 9.845  | 0.314  | 0.753648931 | 0.806822146 | -6.904 | NoSig |
| C7orf63  | 0.192  | 5.686  | 0.311  | 0.755944421 | 0.808697377 | -6.905 | NoSig |
| CEP41    | 0.129  | 7.355  | 0.307  | 0.75917237  | 0.811453427 | -6.907 | NoSig |
| TSPYL1   | 0.094  | 9.632  | 0.306  | 0.759612085 | 0.811453427 | -6.907 | NoSig |
| PDHA1    | -0.107 | 11.248 | -0.302 | 0.763090137 | 0.814583657 | -6.908 | NoSig |
| CKAP2    | 0.118  | 8.853  | 0.300  | 0.764574996 | 0.815536856 | -6.909 | NoSig |
| CAST     | 0.078  | 10.182 | 0.299  | 0.765079969 | 0.815536856 | -6.909 | NoSig |
| C16orf62 | -0.099 | 7.944  | -0.298 | 0.765652563 | 0.815562579 | -6.909 | NoSig |
| GRK5     | 0.129  | 8.382  | 0.295  | 0.768307744 | 0.817805021 | -6.910 | NoSig |
| FAM13C   | -0.218 | 3.575  | -0.290 | 0.771790232 | 0.820464807 | -6.912 | NoSig |
| KLF11    | -0.082 | 8.666  | -0.290 | 0.771910064 | 0.820464807 | -6.912 | NoSig |
| PGK1     | 0.110  | 12.543 | 0.287  | 0.774716646 | 0.822380419 | -6.913 | NoSig |
| ANKRD28  | 0.087  | 8.618  | 0.286  | 0.774818404 | 0.822380419 | -6.913 | NoSig |
| CYP11B1  | 0.121  | 7.259  | 0.278  | 0.781507733 | 0.82888873  | -6.915 | NoSig |
| FXSD2    | 0.134  | 6.557  | 0.276  | 0.78274848  | 0.829612965 | -6.916 | NoSig |
| CCDC90B  | 0.066  | 9.591  | 0.274  | 0.784688725 | 0.831077019 | -6.916 | NoSig |
| CLTA     | 0.098  | 11.698 | 0.272  | 0.785711697 | 0.831568181 | -6.917 | NoSig |
| CYTH2    | -0.081 | 8.864  | -0.264 | 0.792081542 | 0.837713551 | -6.919 | NoSig |
| ZNF277   | -0.086 | 8.558  | -0.262 | 0.793274842 | 0.83837931  | -6.919 | NoSig |
| HRH3     | -0.096 | 5.419  | -0.260 | 0.79490083  | 0.839501089 | -6.920 | NoSig |
| ALDH1A3  | 0.224  | 7.689  | 0.255  | 0.799221884 | 0.843465537 | -6.921 | NoSig |
| ITIH5    | 0.125  | 7.527  | 0.253  | 0.800498665 | 0.84421384  | -6.922 | NoSig |
| AFF4     | -0.101 | 7.506  | -0.249 | 0.803528182 | 0.846808226 | -6.923 | NoSig |
| HNMT     | -0.111 | 8.630  | -0.246 | 0.805954813 | 0.848764028 | -6.923 | NoSig |
| DNAJC13  | 0.087  | 8.800  | 0.244  | 0.807403373 | 0.849687768 | -6.924 | NoSig |

|         |        |        |        |             |             |        |       |
|---------|--------|--------|--------|-------------|-------------|--------|-------|
| ARHGDIB | -0.120 | 11.803 | -0.243 | 0.808265574 | 0.84999357  | -6.924 | NoSig |
| ATP11B  | 0.099  | 8.786  | 0.236  | 0.813705267 | 0.855109352 | -6.926 | NoSig |
| CASS4   | -0.131 | 4.556  | -0.232 | 0.816388678 | 0.857323421 | -6.927 | NoSig |
| RPRD1A  | 0.081  | 8.787  | 0.225  | 0.822466442 | 0.862906286 | -6.928 | NoSig |
| THSD4   | 0.104  | 6.868  | 0.224  | 0.822865577 | 0.862906286 | -6.929 | NoSig |
| EFCAB6  | 0.099  | 4.314  | 0.222  | 0.824630477 | 0.864147653 | -6.929 | NoSig |
| ITGB2   | -0.096 | 10.455 | -0.220 | 0.825701265 | 0.864660409 | -6.929 | NoSig |
| LEPROT  | 0.131  | 9.973  | 0.215  | 0.82995839  | 0.868506774 | -6.931 | NoSig |
| ZFC3H1  | -0.036 | 9.350  | -0.212 | 0.832181562 | 0.869824553 | -6.931 | NoSig |
| CDCP1   | -0.090 | 8.837  | -0.212 | 0.832387585 | 0.869824553 | -6.931 | NoSig |
| BICD2   | 0.092  | 8.636  | 0.211  | 0.833184673 | 0.870038853 | -6.931 | NoSig |
| PLCG2   | 0.098  | 9.207  | 0.210  | 0.833762855 | 0.870038853 | -6.932 | NoSig |
| MYOZ3   | -0.085 | 7.008  | -0.208 | 0.83532635  | 0.871059104 | -6.932 | NoSig |
| PTPLA   | 0.135  | 7.541  | 0.197  | 0.843842008 | 0.879322401 | -6.934 | NoSig |
| PDSS2   | -0.080 | 7.783  | -0.191 | 0.848880538 | 0.883953333 | -6.935 | NoSig |
| PDE5A   | -0.134 | 5.039  | -0.183 | 0.854999159 | 0.889218466 | -6.937 | NoSig |
| DNAJC11 | -0.035 | 9.400  | -0.183 | 0.855132755 | 0.889218466 | -6.937 | NoSig |
| BTRC    | -0.056 | 7.879  | -0.180 | 0.857297108 | 0.890846121 | -6.937 | NoSig |
| DNM3    | 0.056  | 7.634  | 0.178  | 0.859135612 | 0.892133139 | -6.938 | NoSig |
| USP49   | 0.109  | 4.324  | 0.174  | 0.862287263 | 0.89471751  | -6.939 | NoSig |
| TIMM10  | 0.069  | 9.992  | 0.173  | 0.863073713 | 0.89471751  | -6.939 | NoSig |
| TTL12   | 0.040  | 10.150 | 0.172  | 0.863429474 | 0.89471751  | -6.939 | NoSig |
| FBXO9   | -0.039 | 11.103 | -0.171 | 0.864619994 | 0.89532725  | -6.939 | NoSig |
| ZFYVE16 | -0.085 | 7.803  | -0.169 | 0.865593925 | 0.895712016 | -6.939 | NoSig |
| GOLM1   | 0.106  | 8.419  | 0.166  | 0.86850526  | 0.897372491 | -6.940 | NoSig |
| DYNC2H1 | -0.049 | 7.607  | -0.166 | 0.868593597 | 0.897372491 | -6.940 | NoSig |
| TGFB3   | -0.068 | 8.420  | -0.165 | 0.869009003 | 0.897372491 | -6.940 | NoSig |
| TGOLN2  | 0.040  | 10.626 | 0.160  | 0.872758321 | 0.900618754 | -6.941 | NoSig |
| PLD1    | -0.038 | 8.456  | -0.157 | 0.875119582 | 0.902429139 | -6.941 | NoSig |
| RUVBL2  | 0.082  | 9.996  | 0.154  | 0.877522479 | 0.904279921 | -6.942 | NoSig |
| CBFA2T2 | -0.056 | 8.428  | -0.150 | 0.880622311 | 0.906845829 | -6.942 | NoSig |
| TMCC2   | -0.064 | 7.234  | -0.148 | 0.882424726 | 0.908073057 | -6.943 | NoSig |
| WNK1    | 0.078  | 9.787  | 0.145  | 0.884888036 | 0.909978222 | -6.943 | NoSig |
| PECAM1  | 0.052  | 9.675  | 0.136  | 0.891559829 | 0.916205574 | -6.944 | NoSig |
| NELL1   | 0.052  | 5.010  | 0.129  | 0.897141988 | 0.921305342 | -6.945 | NoSig |
| CHRM3   | 0.084  | 6.649  | 0.126  | 0.900082565 | 0.923687214 | -6.946 | NoSig |
| LUC7L   | -0.047 | 8.713  | -0.121 | 0.903755236 | 0.926765398 | -6.946 | NoSig |
| LRRC15  | 0.053  | 8.590  | 0.120  | 0.904575964 | 0.926765398 | -6.946 | NoSig |
| CDK8    | -0.040 | 7.903  | -0.120 | 0.904951821 | 0.926765398 | -6.946 | NoSig |
| ITGAL   | 0.053  | 7.479  | 0.108  | 0.91431383  | 0.935708648 | -6.948 | NoSig |
| GYPE    | -0.069 | 4.072  | -0.106 | 0.915365729 | 0.93582114  | -6.948 | NoSig |
| VPS35   | -0.041 | 11.249 | -0.106 | 0.915849269 | 0.93582114  | -6.948 | NoSig |
| SDS     | 0.037  | 8.329  | 0.105  | 0.916311755 | 0.93582114  | -6.948 | NoSig |
| CCNL1   | 0.031  | 10.494 | 0.103  | 0.918283644 | 0.937191337 | -6.948 | NoSig |
| EHD4    | 0.023  | 9.134  | 0.101  | 0.919646617 | 0.937938628 | -6.948 | NoSig |

|              |        |        |         |             |             |        |       |
|--------------|--------|--------|---------|-------------|-------------|--------|-------|
| TMEM53       | 0.030  | 8.178  | 0.100   | 0.92048521  | 0.93815045  | -6.949 | NoSig |
| IFT122       | -0.026 | 8.999  | -0.092  | 0.926464465 | 0.943597712 | -6.949 | NoSig |
| WARS2        | -0.039 | 7.784  | -0.092  | 0.927165561 | 0.943665427 | -6.949 | NoSig |
| CYP2E1       | -0.047 | 6.311  | -0.091  | 0.927915041 | 0.943782261 | -6.949 | NoSig |
| DOCK2        | 0.056  | 7.277  | 0.088   | 0.930055982 | 0.945103139 | -6.950 | NoSig |
| RCBTB2       | 0.051  | 7.514  | 0.087   | 0.930484865 | 0.945103139 | -6.950 | NoSig |
| MCTP1        | -0.047 | 6.378  | -0.079  | 0.937494369 | 0.951572783 | -6.950 | NoSig |
| NAV2         | 0.034  | 8.600  | 0.073   | 0.942031562 | 0.955525875 | -6.951 | NoSig |
| AHNAK2       | 0.049  | 8.413  | 0.072   | 0.94268719  | 0.955539095 | -6.951 | NoSig |
| VIL1         | -0.039 | 5.337  | -0.066  | 0.947391614 | 0.959068601 | -6.951 | NoSig |
| ATP6V1B1     | -0.043 | 6.758  | -0.066  | 0.947459163 | 0.959068601 | -6.951 | NoSig |
| CP           | -0.047 | 8.926  | -0.065  | 0.948127795 | 0.959092538 | -6.951 | NoSig |
| ATN1         | -0.017 | 9.000  | -0.063  | 0.950131448 | 0.960465984 | -6.952 | NoSig |
| INSL3        | 0.021  | 7.190  | 0.062   | 0.950850568 | 0.960539942 | -6.952 | NoSig |
| PCCB         | 0.023  | 9.341  | 0.059   | 0.95326455  | 0.96232477  | -6.952 | NoSig |
| NDUFB6       | -0.024 | 10.442 | -0.056  | 0.955190209 | 0.963330387 | -6.952 | NoSig |
| HSDL2        | -0.026 | 7.891  | -0.056  | 0.955556369 | 0.963330387 | -6.952 | NoSig |
| GALE         | -0.016 | 7.990  | -0.053  | 0.957475327 | 0.964610984 | -6.952 | NoSig |
| DOCK4        | 0.017  | 8.048  | 0.052   | 0.958675973 | 0.965166671 | -6.952 | NoSig |
| KRAS         | 0.020  | 10.224 | 0.047   | 0.962291569 | 0.968151261 | -6.952 | NoSig |
| HILPDA       | -0.013 | 10.325 | -0.042  | 0.966156574 | 0.971382574 | -6.953 | NoSig |
| PCNP         | 0.013  | 10.944 | 0.039   | 0.968953369 | 0.973536256 | -6.953 | NoSig |
| CCNG2        | 0.017  | 9.290  | 0.034   | 0.973101329 | 0.97704367  | -6.953 | NoSig |
| ADAMTSL3     | 0.010  | 6.979  | 0.030   | 0.976435992 | 0.97973031  | -6.953 | NoSig |
| JAK2         | -0.007 | 8.085  | -0.022  | 0.982525507 | 0.98517561  | -6.953 | NoSig |
| C1QTNF3      | -0.007 | 7.563  | -0.021  | 0.983219326 | 0.985206966 | -6.953 | NoSig |
| WTAP         | -0.002 | 9.696  | -0.005  | 0.995923305 | 0.997264616 | -6.954 | NoSig |
| RNF32        | -0.001 | 5.178  | -0.001  | 0.999339102 | 0.999598627 | -6.954 | NoSig |
| SIRPB1       | 0.000  | 6.012  | -0.001  | 0.999598627 | 0.999598627 | -6.954 | NoSig |
| SYN2         | -5.366 | 8.053  | -15.049 | 1.03E-35    | 5.11E-33    | 70.356 | Down  |
| FGF4         | -6.090 | 8.047  | -13.572 | 6.32E-31    | 1.88E-28    | 59.525 | Down  |
| ADAM21       | -4.302 | 7.885  | -13.377 | 2.70E-30    | 6.68E-28    | 58.099 | Down  |
| KLF7         | -3.452 | 9.514  | -13.030 | 3.54E-29    | 7.53E-27    | 55.566 | Down  |
| PPP1R11      | -3.032 | 11.130 | -12.773 | 2.37E-28    | 3.92E-26    | 53.698 | Down  |
| PQLC2        | -3.320 | 7.842  | -12.560 | 1.15E-27    | 1.71E-25    | 52.146 | Down  |
| KDM6B        | -4.637 | 9.638  | -12.431 | 2.96E-27    | 4.00E-25    | 51.215 | Down  |
| CYP2A6       | -5.718 | 8.444  | -12.393 | 3.94E-27    | 4.88E-25    | 50.935 | Down  |
| CNOT1        | -2.772 | 10.918 | -12.373 | 4.56E-27    | 5.22E-25    | 50.791 | Down  |
| CNNM2        | -3.245 | 8.512  | -12.047 | 4.99E-26    | 5.30E-24    | 48.439 | Down  |
| GATA1        | -4.824 | 6.633  | -11.998 | 7.14E-26    | 7.08E-24    | 48.086 | Down  |
| LOC100506469 | -3.446 | 9.041  | -11.887 | 1.61E-25    | 1.49E-23    | 47.289 | Down  |
| TAF5L        | -3.102 | 9.470  | -11.847 | 2.15E-25    | 1.88E-23    | 47.002 | Down  |
| ZMYND11      | -2.951 | 11.388 | -11.660 | 8.38E-25    | 6.92E-23    | 45.665 | Down  |
| PDE1C        | -4.164 | 7.895  | -11.637 | 9.93E-25    | 7.77E-23    | 45.498 | Down  |
| CFL1         | -4.433 | 14.723 | -11.582 | 1.48E-24    | 1.10E-22    | 45.104 | Down  |



|          |        |        |         |          |          |        |      |
|----------|--------|--------|---------|----------|----------|--------|------|
| NAGA     | -2.265 | 9.301  | -11.452 | 3.80E-24 | 2.69E-22 | 44.178 | Down |
| HUNK     | -3.930 | 7.055  | -11.408 | 5.22E-24 | 3.53E-22 | 43.867 | Down |
| HTR6     | -5.141 | 7.299  | -11.086 | 5.31E-23 | 3.04E-21 | 41.587 | Down |
| WFDC8    | -3.778 | 6.397  | -11.059 | 6.45E-23 | 3.55E-21 | 41.395 | Down |
| ZNF638   | -2.651 | 10.599 | -10.956 | 1.35E-22 | 7.17E-21 | 40.670 | Down |
| PAX1     | -4.924 | 7.180  | -10.949 | 1.42E-22 | 7.28E-21 | 40.621 | Down |
| EXD2     | -2.359 | 9.021  | -10.914 | 1.82E-22 | 9.02E-21 | 40.376 | Down |
| NEK11    | -2.221 | 8.792  | -10.770 | 5.11E-22 | 2.37E-20 | 39.363 | Down |
| COQ10B   | -3.780 | 9.485  | -10.573 | 2.07E-21 | 9.05E-20 | 37.988 | Down |
| ASAH1    | -3.318 | 12.058 | -10.525 | 2.90E-21 | 1.23E-19 | 37.657 | Down |
| ATM      | -2.742 | 9.117  | -10.516 | 3.10E-21 | 1.27E-19 | 37.590 | Down |
| TERF2    | -2.545 | 9.292  | -10.514 | 3.15E-21 | 1.27E-19 | 37.575 | Down |
| CD80     | -3.057 | 8.572  | -10.429 | 5.71E-21 | 2.18E-19 | 36.991 | Down |
| TMEM151B | -3.123 | 7.446  | -10.421 | 6.05E-21 | 2.25E-19 | 36.934 | Down |
| GPR182   | -3.665 | 7.741  | -10.366 | 8.95E-21 | 3.25E-19 | 36.549 | Down |
| FAM69A   | -3.094 | 8.744  | -10.325 | 1.19E-20 | 4.02E-19 | 36.269 | Down |
| QKI      | -3.450 | 10.864 | -10.082 | 6.51E-20 | 2.10E-18 | 34.600 | Down |
| ZNF207   | -2.027 | 11.415 | -10.041 | 8.71E-20 | 2.72E-18 | 34.314 | Down |
| PIK3C2A  | -4.025 | 9.118  | -10.039 | 8.79E-20 | 2.72E-18 | 34.306 | Down |
| SOS1     | -3.045 | 8.568  | -9.973  | 1.40E-19 | 4.24E-18 | 33.850 | Down |
| NAP1L4   | -1.957 | 10.005 | -9.826  | 3.86E-19 | 1.13E-17 | 32.852 | Down |
| FCN2     | -4.031 | 7.756  | -9.798  | 4.68E-19 | 1.34E-17 | 32.664 | Down |
| SCAMP1   | -2.238 | 10.016 | -9.779  | 5.32E-19 | 1.49E-17 | 32.537 | Down |
| HFE      | -2.869 | 8.725  | -9.773  | 5.55E-19 | 1.50E-17 | 32.496 | Down |
| ACTR2    | -2.699 | 11.988 | -9.484  | 4.04E-18 | 1.02E-16 | 30.546 | Down |
| FAM120A  | -2.178 | 12.147 | -9.424  | 6.06E-18 | 1.50E-16 | 30.150 | Down |
| RQCD1    | -1.648 | 9.983  | -9.205  | 2.68E-17 | 6.32E-16 | 28.692 | Down |
| SEC62    | -2.524 | 10.438 | -9.182  | 3.11E-17 | 7.22E-16 | 28.546 | Down |
| ZNF146   | -2.583 | 10.661 | -9.170  | 3.39E-17 | 7.75E-16 | 28.461 | Down |
| PDE8A    | -2.162 | 8.943  | -9.137  | 4.21E-17 | 9.35E-16 | 28.247 | Down |
| CYP17A1  | -3.821 | 7.477  | -9.111  | 5.03E-17 | 1.10E-15 | 28.074 | Down |
| STRADA   | -2.295 | 10.005 | -8.849  | 2.87E-16 | 5.80E-15 | 26.365 | Down |
| CCDC40   | -2.921 | 7.392  | -8.848  | 2.89E-16 | 5.80E-15 | 26.360 | Down |
| PAX8     | -3.352 | 10.387 | -8.831  | 3.24E-16 | 6.33E-15 | 26.248 | Down |
| PPM1F    | -2.172 | 8.946  | -8.788  | 4.31E-16 | 8.32E-15 | 25.967 | Down |
| RASGRF1  | -2.870 | 7.574  | -8.699  | 7.70E-16 | 1.45E-14 | 25.399 | Down |
| BRS3     | -3.980 | 6.605  | -8.662  | 9.84E-16 | 1.83E-14 | 25.159 | Down |
| APH1A    | -2.533 | 10.656 | -8.622  | 1.28E-15 | 2.34E-14 | 24.904 | Down |
| SNRK     | -2.208 | 9.420  | -8.580  | 1.69E-15 | 3.06E-14 | 24.630 | Down |
| PACSIN2  | -2.396 | 10.795 | -8.567  | 1.84E-15 | 3.29E-14 | 24.547 | Down |
| ARIH1    | -2.128 | 9.317  | -8.396  | 5.54E-15 | 9.58E-14 | 23.466 | Down |
| RAC1     | -1.956 | 12.639 | -8.319  | 9.11E-15 | 1.54E-13 | 22.978 | Down |
| GUCA1A   | -3.811 | 6.741  | -8.261  | 1.32E-14 | 2.18E-13 | 22.615 | Down |
| GRIK5    | -3.854 | 8.226  | -8.255  | 1.38E-14 | 2.25E-13 | 22.574 | Down |
| CCRN4L   | -1.969 | 8.601  | -8.226  | 1.65E-14 | 2.67E-13 | 22.395 | Down |

|          |        |        |        |          |          |        |      |
|----------|--------|--------|--------|----------|----------|--------|------|
| SLC4A4   | -4.262 | 8.677  | -8.173 | 2.32E-14 | 3.71E-13 | 22.062 | Down |
| SLC5A3   | -2.897 | 9.625  | -8.094 | 3.84E-14 | 6.07E-13 | 21.571 | Down |
| TYR      | -3.961 | 6.686  | -8.068 | 4.50E-14 | 7.01E-13 | 21.414 | Down |
| MTDH     | -2.302 | 11.689 | -8.068 | 4.53E-14 | 7.01E-13 | 21.409 | Down |
| ZMYM3    | -1.809 | 9.377  | -8.029 | 5.78E-14 | 8.86E-13 | 21.170 | Down |
| GALNT1   | -2.049 | 11.187 | -8.022 | 6.03E-14 | 9.16E-13 | 21.128 | Down |
| SLC36A1  | -3.397 | 7.891  | -7.967 | 8.52E-14 | 1.28E-12 | 20.791 | Down |
| LARP4    | -1.920 | 9.665  | -7.965 | 8.64E-14 | 1.29E-12 | 20.777 | Down |
| SLC17A1  | -3.939 | 7.000  | -7.905 | 1.26E-13 | 1.85E-12 | 20.408 | Down |
| CRTAC1   | -3.667 | 7.285  | -7.904 | 1.27E-13 | 1.85E-12 | 20.401 | Down |
| RHOB     | -3.214 | 9.587  | -7.869 | 1.58E-13 | 2.27E-12 | 20.189 | Down |
| RTN4     | -2.266 | 12.325 | -7.847 | 1.81E-13 | 2.58E-12 | 20.056 | Down |
| DNAH3    | -4.609 | 10.157 | -7.810 | 2.28E-13 | 3.17E-12 | 19.827 | Down |
| MYT1     | -4.506 | 7.450  | -7.805 | 2.35E-13 | 3.23E-12 | 19.800 | Down |
| HSP90AB1 | -2.488 | 13.983 | -7.780 | 2.74E-13 | 3.74E-12 | 19.648 | Down |
| PLXNA3   | -2.236 | 8.269  | -7.766 | 2.99E-13 | 4.04E-12 | 19.564 | Down |
| DRP2     | -4.130 | 7.456  | -7.750 | 3.30E-13 | 4.39E-12 | 19.465 | Down |
| CEPT1    | -2.115 | 8.858  | -7.723 | 3.90E-13 | 5.13E-12 | 19.304 | Down |
| NOX5     | -3.105 | 6.957  | -7.682 | 5.02E-13 | 6.55E-12 | 19.057 | Down |
| DNAH6    | -2.100 | 6.005  | -7.669 | 5.46E-13 | 7.06E-12 | 18.974 | Down |
| PRO2949  | -3.591 | 6.443  | -7.663 | 5.66E-13 | 7.26E-12 | 18.939 | Down |
| RAPGEF5  | -2.039 | 8.462  | -7.654 | 5.97E-13 | 7.59E-12 | 18.887 | Down |
| ZNF160   | -3.053 | 10.705 | -7.649 | 6.17E-13 | 7.77E-12 | 18.855 | Down |
| CACNA1D  | -2.727 | 7.546  | -7.600 | 8.34E-13 | 1.03E-11 | 18.561 | Down |
| C5orf22  | -2.005 | 9.424  | -7.579 | 9.47E-13 | 1.16E-11 | 18.436 | Down |
| EXD3     | -2.545 | 7.857  | -7.563 | 1.04E-12 | 1.27E-11 | 18.342 | Down |
| HMGGA2   | -3.654 | 7.158  | -7.528 | 1.29E-12 | 1.55E-11 | 18.132 | Down |
| RPP30    | -1.657 | 9.336  | -7.514 | 1.41E-12 | 1.66E-11 | 18.050 | Down |
| SV2C     | -3.057 | 6.278  | -7.441 | 2.19E-12 | 2.53E-11 | 17.616 | Down |
| SNAP25   | -4.429 | 7.813  | -7.377 | 3.22E-12 | 3.65E-11 | 17.241 | Down |
| RERE     | -2.214 | 9.454  | -7.330 | 4.27E-12 | 4.81E-11 | 16.965 | Down |
| GNG12    | -2.686 | 9.599  | -7.306 | 4.95E-12 | 5.53E-11 | 16.822 | Down |
| KLHDC4   | -2.092 | 8.357  | -7.284 | 5.63E-12 | 6.25E-11 | 16.696 | Down |
| DSG2     | -3.707 | 10.797 | -7.277 | 5.90E-12 | 6.49E-11 | 16.651 | Down |
| FARP2    | -2.162 | 7.798  | -7.273 | 6.01E-12 | 6.58E-11 | 16.632 | Down |
| PGC      | -3.302 | 7.362  | -7.254 | 6.75E-12 | 7.27E-11 | 16.519 | Down |
| TRAM2    | -1.907 | 9.091  | -7.211 | 8.72E-12 | 9.13E-11 | 16.269 | Down |
| LRRC41   | -2.489 | 9.072  | -7.089 | 1.79E-11 | 1.85E-10 | 15.567 | Down |
| ATP4B    | -3.100 | 6.160  | -7.074 | 1.96E-11 | 2.01E-10 | 15.479 | Down |
| TRPM3    | -2.886 | 7.827  | -7.040 | 2.39E-11 | 2.44E-10 | 15.285 | Down |
| LRRC48   | -2.039 | 7.395  | -7.015 | 2.77E-11 | 2.77E-10 | 15.141 | Down |
| MCCC2    | -2.383 | 9.851  | -7.013 | 2.80E-11 | 2.77E-10 | 15.133 | Down |
| TOR1AIP1 | -2.352 | 9.710  | -7.005 | 2.93E-11 | 2.88E-10 | 15.086 | Down |
| SRGAP3   | -2.264 | 8.202  | -7.005 | 2.94E-11 | 2.88E-10 | 15.084 | Down |
| PNN      | -1.627 | 12.626 | -6.974 | 3.52E-11 | 3.40E-10 | 14.909 | Down |

|          |        |        |        |          |          |        |      |
|----------|--------|--------|--------|----------|----------|--------|------|
| DCTN5    | -1.784 | 9.042  | -6.959 | 3.83E-11 | 3.66E-10 | 14.825 | Down |
| NEUROD2  | -3.140 | 7.596  | -6.918 | 4.89E-11 | 4.63E-10 | 14.589 | Down |
| GHITM    | -1.716 | 11.738 | -6.862 | 6.73E-11 | 6.29E-10 | 14.277 | Down |
| MPHOSPH6 | -2.066 | 10.142 | -6.854 | 7.07E-11 | 6.57E-10 | 14.229 | Down |
| DOK5     | -2.163 | 8.999  | -6.771 | 1.13E-10 | 1.03E-09 | 13.769 | Down |
| FBXW2    | -1.681 | 9.043  | -6.759 | 1.22E-10 | 1.10E-09 | 13.699 | Down |
| RGS7     | -3.201 | 5.962  | -6.750 | 1.28E-10 | 1.14E-09 | 13.652 | Down |
| ENTPD5   | -2.271 | 7.713  | -6.715 | 1.57E-10 | 1.36E-09 | 13.453 | Down |
| GABRB2   | -3.340 | 6.939  | -6.698 | 1.73E-10 | 1.49E-09 | 13.358 | Down |
| NOL9     | -1.305 | 9.661  | -6.688 | 1.83E-10 | 1.56E-09 | 13.305 | Down |
| PRR14L   | -2.356 | 8.622  | -6.679 | 1.93E-10 | 1.64E-09 | 13.254 | Down |
| LMO3     | -3.350 | 7.889  | -6.670 | 2.02E-10 | 1.69E-09 | 13.205 | Down |
| SERPINB6 | -2.034 | 9.941  | -6.650 | 2.26E-10 | 1.86E-09 | 13.098 | Down |
| ZNF85    | -1.647 | 9.392  | -6.641 | 2.38E-10 | 1.94E-09 | 13.049 | Down |
| SLC39A6  | -2.674 | 11.131 | -6.636 | 2.45E-10 | 1.99E-09 | 13.019 | Down |
| TNR      | -1.987 | 7.305  | -6.635 | 2.46E-10 | 1.99E-09 | 13.015 | Down |
| DIP2A    | -2.643 | 9.013  | -6.623 | 2.63E-10 | 2.11E-09 | 12.950 | Down |
| GOSR1    | -1.396 | 9.473  | -6.613 | 2.79E-10 | 2.23E-09 | 12.894 | Down |
| ZNF611   | -2.206 | 9.513  | -6.555 | 3.87E-10 | 3.08E-09 | 12.575 | Down |
| CLEC7A   | -3.602 | 9.423  | -6.538 | 4.25E-10 | 3.36E-09 | 12.483 | Down |
| MOSPD1   | -1.515 | 8.952  | -6.520 | 4.71E-10 | 3.69E-09 | 12.384 | Down |
| CYP19A1  | -3.813 | 6.204  | -6.505 | 5.12E-10 | 3.96E-09 | 12.303 | Down |
| ADAMTS20 | -2.964 | 5.952  | -6.446 | 7.10E-10 | 5.47E-09 | 11.985 | Down |
| DPP6     | -2.673 | 6.916  | -6.442 | 7.26E-10 | 5.56E-09 | 11.964 | Down |
| CCDC7    | -2.224 | 7.809  | -6.433 | 7.63E-10 | 5.81E-09 | 11.916 | Down |
| GABRG3   | -2.690 | 6.102  | -6.427 | 7.88E-10 | 5.98E-09 | 11.883 | Down |
| GAD2     | -3.478 | 6.076  | -6.426 | 7.96E-10 | 5.98E-09 | 11.874 | Down |
| ZKSCAN3  | -2.098 | 8.416  | -6.425 | 7.96E-10 | 5.98E-09 | 11.874 | Down |
| LRRC16A  | -1.624 | 8.743  | -6.423 | 8.06E-10 | 6.02E-09 | 11.862 | Down |
| TTL5     | -1.368 | 8.637  | -6.419 | 8.26E-10 | 6.14E-09 | 11.838 | Down |
| KAT6B    | -2.507 | 8.770  | -6.375 | 1.05E-09 | 7.71E-09 | 11.603 | Down |
| CANT1    | -1.983 | 9.540  | -6.363 | 1.13E-09 | 8.20E-09 | 11.538 | Down |
| ZNF33B   | -2.176 | 7.936  | -6.315 | 1.46E-09 | 1.05E-08 | 11.283 | Down |
| HDAC9    | -3.158 | 7.484  | -6.276 | 1.81E-09 | 1.29E-08 | 11.077 | Down |
| GPR97    | -3.341 | 7.486  | -6.236 | 2.25E-09 | 1.59E-08 | 10.865 | Down |
| YTHDF3   | -2.212 | 9.534  | -6.231 | 2.31E-09 | 1.63E-08 | 10.837 | Down |
| PDZD3    | -2.187 | 5.401  | -6.220 | 2.45E-09 | 1.72E-08 | 10.781 | Down |
| GABRA2   | -2.879 | 5.519  | -6.213 | 2.56E-09 | 1.78E-08 | 10.741 | Down |
| JAK1     | -1.807 | 10.644 | -6.204 | 2.67E-09 | 1.86E-08 | 10.698 | Down |
| C1orf61  | -3.114 | 8.034  | -6.193 | 2.85E-09 | 1.97E-08 | 10.636 | Down |
| GYPA     | -3.318 | 5.196  | -6.166 | 3.28E-09 | 2.25E-08 | 10.499 | Down |
| SPEN     | -1.130 | 9.826  | -6.163 | 3.33E-09 | 2.27E-08 | 10.483 | Down |
| SLC17A4  | -3.910 | 6.585  | -6.138 | 3.83E-09 | 2.60E-08 | 10.350 | Down |
| NAA15    | -1.782 | 8.521  | -6.109 | 4.47E-09 | 3.02E-08 | 10.200 | Down |
| TAT      | -3.500 | 6.860  | -6.070 | 5.51E-09 | 3.67E-08 | 9.997  | Down |

|          |        |        |        |          |          |       |      |
|----------|--------|--------|--------|----------|----------|-------|------|
| ARHGAP29 | -2.633 | 9.750  | -6.064 | 5.67E-09 | 3.76E-08 | 9.969 | Down |
| KIAA1467 | -2.467 | 8.402  | -6.055 | 5.97E-09 | 3.94E-08 | 9.919 | Down |
| TBC1D12  | -1.430 | 8.356  | -6.045 | 6.27E-09 | 4.13E-08 | 9.871 | Down |
| POLR3B   | -1.294 | 8.805  | -5.991 | 8.36E-09 | 5.43E-08 | 9.592 | Down |
| FSTL4    | -1.925 | 5.855  | -5.946 | 1.06E-08 | 6.83E-08 | 9.361 | Down |
| ITSN1    | -2.034 | 8.838  | -5.885 | 1.46E-08 | 9.29E-08 | 9.051 | Down |
| CRISPLD2 | -2.380 | 9.025  | -5.845 | 1.81E-08 | 1.14E-07 | 8.847 | Down |
| JRK      | -1.595 | 9.076  | -5.754 | 2.88E-08 | 1.75E-07 | 8.396 | Down |
| ABCC9    | -2.058 | 7.411  | -5.745 | 3.02E-08 | 1.83E-07 | 8.351 | Down |
| STAT5B   | -1.523 | 9.003  | -5.742 | 3.07E-08 | 1.86E-07 | 8.332 | Down |
| RIMS1    | -3.298 | 6.192  | -5.737 | 3.15E-08 | 1.89E-07 | 8.308 | Down |
| CDH4     | -2.564 | 7.494  | -5.734 | 3.20E-08 | 1.91E-07 | 8.294 | Down |
| LRCH3    | -1.628 | 8.004  | -5.728 | 3.30E-08 | 1.97E-07 | 8.262 | Down |
| ZDHHC18  | -1.918 | 8.802  | -5.687 | 4.07E-08 | 2.38E-07 | 8.061 | Down |
| DNAH17   | -2.346 | 6.885  | -5.672 | 4.38E-08 | 2.54E-07 | 7.991 | Down |
| UBA1     | -2.334 | 11.492 | -5.662 | 4.61E-08 | 2.66E-07 | 7.941 | Down |
| STX6     | -1.176 | 9.943  | -5.636 | 5.28E-08 | 3.02E-07 | 7.810 | Down |
| PIK3R2   | -1.740 | 8.284  | -5.610 | 6.02E-08 | 3.43E-07 | 7.683 | Down |
| NDST1    | -1.748 | 8.332  | -5.608 | 6.06E-08 | 3.44E-07 | 7.676 | Down |
| SH3YL1   | -2.651 | 10.795 | -5.607 | 6.11E-08 | 3.45E-07 | 7.668 | Down |
| MAPK1    | -1.361 | 9.903  | -5.606 | 6.13E-08 | 3.45E-07 | 7.666 | Down |
| PTPRO    | -5.373 | 11.908 | -5.584 | 6.87E-08 | 3.84E-07 | 7.556 | Down |
| COPA     | -2.706 | 11.245 | -5.571 | 7.31E-08 | 4.04E-07 | 7.495 | Down |
| MS4A3    | -3.182 | 5.161  | -5.555 | 7.94E-08 | 4.36E-07 | 7.415 | Down |
| TRMT2B   | -1.972 | 8.834  | -5.539 | 8.61E-08 | 4.71E-07 | 7.337 | Down |
| FBXL14   | -1.684 | 8.717  | -5.518 | 9.55E-08 | 5.16E-07 | 7.238 | Down |
| TIA1     | -1.462 | 10.520 | -5.506 | 1.01E-07 | 5.46E-07 | 7.180 | Down |
| CACNB2   | -1.907 | 7.228  | -5.489 | 1.10E-07 | 5.87E-07 | 7.097 | Down |
| SAMHD1   | -2.661 | 8.762  | -5.476 | 1.18E-07 | 6.23E-07 | 7.035 | Down |
| NRXN1    | -2.978 | 5.971  | -5.451 | 1.33E-07 | 7.01E-07 | 6.915 | Down |
| IRF6     | -1.779 | 10.533 | -5.438 | 1.42E-07 | 7.44E-07 | 6.854 | Down |
| CNKSR2   | -2.884 | 6.546  | -5.434 | 1.45E-07 | 7.55E-07 | 6.837 | Down |
| VPS53    | -1.694 | 7.370  | -5.425 | 1.52E-07 | 7.88E-07 | 6.792 | Down |
| LILRA5   | -2.204 | 7.160  | -5.414 | 1.60E-07 | 8.22E-07 | 6.742 | Down |
| VPS8     | -1.211 | 8.594  | -5.395 | 1.76E-07 | 8.98E-07 | 6.650 | Down |
| NEK1     | -1.455 | 8.315  | -5.342 | 2.28E-07 | 1.15E-06 | 6.401 | Down |
| GRM5     | -2.906 | 5.457  | -5.230 | 3.92E-07 | 1.92E-06 | 5.877 | Down |
| AFG3L2   | -1.385 | 10.050 | -5.214 | 4.23E-07 | 2.04E-06 | 5.805 | Down |
| SLC4A5   | -1.822 | 6.975  | -5.214 | 4.23E-07 | 2.04E-06 | 5.804 | Down |
| ZNF586   | -1.378 | 8.424  | -5.197 | 4.61E-07 | 2.20E-06 | 5.722 | Down |
| UBXN4    | -2.742 | 10.366 | -5.173 | 5.15E-07 | 2.44E-06 | 5.616 | Down |
| NOS1     | -2.496 | 7.840  | -5.096 | 7.42E-07 | 3.45E-06 | 5.264 | Down |
| KCNK10   | -2.148 | 6.315  | -5.082 | 7.92E-07 | 3.67E-06 | 5.201 | Down |
| SMAD4    | -1.243 | 8.607  | -5.078 | 8.10E-07 | 3.74E-06 | 5.180 | Down |
| CXADR    | -2.784 | 10.313 | -5.060 | 8.80E-07 | 4.04E-06 | 5.101 | Down |

|          |        |        |        |          |          |       |      |
|----------|--------|--------|--------|----------|----------|-------|------|
| SMC1A    | -1.654 | 10.464 | -5.048 | 9.31E-07 | 4.25E-06 | 5.046 | Down |
| F11      | -2.743 | 6.200  | -5.047 | 9.36E-07 | 4.26E-06 | 5.042 | Down |
| TTN      | -1.680 | 7.736  | -5.029 | 1.02E-06 | 4.62E-06 | 4.959 | Down |
| PPA2     | -1.278 | 10.254 | -5.028 | 1.03E-06 | 4.63E-06 | 4.954 | Down |
| SRPK2    | -1.546 | 9.918  | -5.020 | 1.06E-06 | 4.78E-06 | 4.921 | Down |
| EYA4     | -2.657 | 5.994  | -5.009 | 1.12E-06 | 5.03E-06 | 4.869 | Down |
| SIRT2    | -1.502 | 9.816  | -4.994 | 1.20E-06 | 5.35E-06 | 4.804 | Down |
| MCM9     | -1.418 | 8.358  | -4.990 | 1.22E-06 | 5.44E-06 | 4.785 | Down |
| RHOA     | -1.324 | 13.246 | -4.970 | 1.34E-06 | 5.93E-06 | 4.698 | Down |
| EGFR     | -2.094 | 8.493  | -4.937 | 1.56E-06 | 6.82E-06 | 4.551 | Down |
| GPR12    | -1.959 | 8.307  | -4.910 | 1.77E-06 | 7.65E-06 | 4.433 | Down |
| STK38    | -1.238 | 10.208 | -4.889 | 1.95E-06 | 8.37E-06 | 4.339 | Down |
| PIAS2    | -1.441 | 8.872  | -4.888 | 1.96E-06 | 8.38E-06 | 4.335 | Down |
| INPP5A   | -1.092 | 9.046  | -4.857 | 2.25E-06 | 9.60E-06 | 4.199 | Down |
| ADAM23   | -2.018 | 7.336  | -4.843 | 2.40E-06 | 1.02E-05 | 4.140 | Down |
| PIGL     | -1.865 | 8.282  | -4.817 | 2.71E-06 | 1.14E-05 | 4.023 | Down |
| NDUFA10  | -1.171 | 10.359 | -4.795 | 2.99E-06 | 1.26E-05 | 3.929 | Down |
| SLC1A2   | -1.929 | 7.331  | -4.784 | 3.14E-06 | 1.31E-05 | 3.882 | Down |
| DR1      | -1.101 | 9.644  | -4.772 | 3.32E-06 | 1.37E-05 | 3.829 | Down |
| CSNK1A1  | -1.249 | 11.439 | -4.761 | 3.48E-06 | 1.44E-05 | 3.784 | Down |
| ZNF654   | -1.752 | 7.889  | -4.724 | 4.10E-06 | 1.68E-05 | 3.627 | Down |
| MBTPS2   | -1.728 | 7.666  | -4.720 | 4.19E-06 | 1.71E-05 | 3.606 | Down |
| RBM15    | -1.951 | 9.122  | -4.714 | 4.30E-06 | 1.74E-05 | 3.581 | Down |
| NR1H4    | -2.593 | 5.616  | -4.700 | 4.57E-06 | 1.84E-05 | 3.523 | Down |
| TAF5     | -1.756 | 8.315  | -4.698 | 4.62E-06 | 1.85E-05 | 3.512 | Down |
| HEATR2   | -1.172 | 10.054 | -4.659 | 5.48E-06 | 2.18E-05 | 3.350 | Down |
| IRAK1    | -2.043 | 11.583 | -4.657 | 5.54E-06 | 2.20E-05 | 3.339 | Down |
| LYZ      | -2.976 | 11.957 | -4.636 | 6.08E-06 | 2.39E-05 | 3.251 | Down |
| IKZF1    | -1.547 | 9.216  | -4.630 | 6.23E-06 | 2.44E-05 | 3.228 | Down |
| KLHL4    | -2.019 | 6.654  | -4.627 | 6.32E-06 | 2.47E-05 | 3.214 | Down |
| DMWD     | -1.142 | 10.018 | -4.612 | 6.73E-06 | 2.62E-05 | 3.153 | Down |
| MACF1    | -1.454 | 10.452 | -4.606 | 6.93E-06 | 2.68E-05 | 3.126 | Down |
| TMEM126B | -1.443 | 10.355 | -4.584 | 7.64E-06 | 2.94E-05 | 3.033 | Down |
| ABCD3    | -1.829 | 9.875  | -4.571 | 8.07E-06 | 3.09E-05 | 2.980 | Down |
| ACSM5    | -2.109 | 7.355  | -4.570 | 8.12E-06 | 3.10E-05 | 2.975 | Down |
| AMMECR1  | -1.451 | 8.635  | -4.559 | 8.51E-06 | 3.24E-05 | 2.930 | Down |
| DNTT     | -1.903 | 4.182  | -4.550 | 8.86E-06 | 3.35E-05 | 2.892 | Down |
| LRPPRC   | -1.282 | 10.936 | -4.470 | 1.25E-05 | 4.63E-05 | 2.564 | Down |
| ERCC8    | -1.248 | 8.116  | -4.467 | 1.26E-05 | 4.68E-05 | 2.553 | Down |
| HSD17B12 | -1.690 | 11.148 | -4.462 | 1.29E-05 | 4.75E-05 | 2.534 | Down |
| CTNNA3   | -2.235 | 4.930  | -4.443 | 1.40E-05 | 5.13E-05 | 2.456 | Down |
| FBXL18   | -1.060 | 7.816  | -4.440 | 1.42E-05 | 5.18E-05 | 2.444 | Down |
| CD74     | -2.329 | 12.643 | -4.416 | 1.57E-05 | 5.71E-05 | 2.347 | Down |
| AGK      | -1.812 | 8.779  | -4.410 | 1.61E-05 | 5.86E-05 | 2.321 | Down |
| DYNLRB1  | -1.627 | 11.419 | -4.408 | 1.63E-05 | 5.88E-05 | 2.314 | Down |

|           |        |        |        |             |             |        |      |
|-----------|--------|--------|--------|-------------|-------------|--------|------|
| MYT1L     | -2.368 | 5.586  | -4.401 | 1.67E-05    | 6.04E-05    | 2.286  | Down |
| ZNF264    | -1.511 | 8.534  | -4.387 | 1.78E-05    | 6.40E-05    | 2.227  | Down |
| TBX5      | -2.073 | 6.911  | -4.384 | 1.80E-05    | 6.43E-05    | 2.218  | Down |
| ACACB     | -2.216 | 7.518  | -4.379 | 1.84E-05    | 6.55E-05    | 2.199  | Down |
| RECK      | -2.746 | 11.320 | -4.331 | 2.25E-05    | 7.95E-05    | 2.006  | Down |
| CCND3     | -1.298 | 9.981  | -4.310 | 2.46E-05    | 8.62E-05    | 1.922  | Down |
| NTRK3     | -1.826 | 8.549  | -4.265 | 2.97E-05    | 0.000103547 | 1.744  | Down |
| TRPV5     | -1.794 | 7.042  | -4.241 | 3.27E-05    | 0.000112984 | 1.650  | Down |
| NR5A2     | -2.105 | 6.356  | -4.199 | 3.88E-05    | 0.000132013 | 1.489  | Down |
| CAMKMT    | -1.813 | 6.859  | -4.185 | 4.11E-05    | 0.000139484 | 1.435  | Down |
| CTTN      | -3.129 | 10.261 | -4.138 | 4.99E-05    | 0.000168158 | 1.252  | Down |
| CTNNA1    | -1.124 | 11.394 | -4.101 | 5.78E-05    | 0.000193723 | 1.112  | Down |
| CHPT1     | -1.649 | 10.308 | -4.087 | 6.12E-05    | 0.000203491 | 1.059  | Down |
| MDFIC     | -1.785 | 9.518  | -4.076 | 6.40E-05    | 0.000211855 | 1.017  | Down |
| KIF5C     | -1.493 | 8.274  | -4.072 | 6.50E-05    | 0.000214696 | 1.002  | Down |
| TMC7      | -1.965 | 6.071  | -4.013 | 8.20E-05    | 0.0002674   | 0.783  | Down |
| GNB5      | -1.272 | 7.649  | -3.999 | 8.67E-05    | 0.000281968 | 0.731  | Down |
| TET3      | -1.637 | 6.941  | -3.980 | 9.36E-05    | 0.000301254 | 0.658  | Down |
| ATF6B     | -1.069 | 8.682  | -3.960 | 0.00010115  | 0.000323697 | 0.585  | Down |
| POLR2B    | -1.240 | 11.307 | -3.944 | 0.000107591 | 0.000341853 | 0.527  | Down |
| TXLNA     | -1.682 | 8.507  | -3.938 | 0.000109975 | 0.000347941 | 0.506  | Down |
| NUMA1     | -1.302 | 9.475  | -3.925 | 0.000115859 | 0.000365005 | 0.457  | Down |
| ADAM9     | -1.891 | 10.039 | -3.910 | 0.000122901 | 0.000386372 | 0.402  | Down |
| ENTPD3    | -1.915 | 7.310  | -3.887 | 0.000133942 | 0.000418898 | 0.321  | Down |
| ZFHX4     | -1.475 | 7.989  | -3.887 | 0.000134092 | 0.000418898 | 0.320  | Down |
| PRF1      | -1.794 | 8.739  | -3.864 | 0.000146829 | 0.000455813 | 0.235  | Down |
| SIK2      | -1.560 | 7.803  | -3.859 | 0.000149682 | 0.000462738 | 0.216  | Down |
| SCTR      | -2.222 | 5.773  | -3.835 | 0.000163461 | 0.000503242 | 0.134  | Down |
| ZNF81     | -2.514 | 5.954  | -3.819 | 0.000174069 | 0.0005315   | 0.075  | Down |
| IGSF3     | -1.194 | 9.827  | -3.815 | 0.000176876 | 0.000538964 | 0.060  | Down |
| RHOQ      | -1.399 | 10.226 | -3.789 | 0.000194728 | 0.00059094  | -0.030 | Down |
| KIDINS220 | -1.046 | 9.493  | -3.779 | 0.000202796 | 0.00061168  | -0.068 | Down |
| ARHGAP5   | -1.043 | 8.510  | -3.777 | 0.000204313 | 0.000615008 | -0.075 | Down |
| ANGPT1    | -1.596 | 8.391  | -3.747 | 0.000228406 | 0.000682007 | -0.180 | Down |
| ARHGEF2   | -1.422 | 10.397 | -3.731 | 0.000242393 | 0.000719077 | -0.235 | Down |
| FOXJ2     | -1.130 | 9.237  | -3.731 | 0.000242755 | 0.000719077 | -0.237 | Down |
| ROCK1     | -1.772 | 9.852  | -3.700 | 0.000272389 | 0.000801688 | -0.344 | Down |
| TRIM37    | -1.080 | 9.596  | -3.682 | 0.000290957 | 0.000851678 | -0.406 | Down |
| TAL1      | -1.702 | 6.864  | -3.662 | 0.000313686 | 0.000912821 | -0.476 | Down |
| NMNAT2    | -2.115 | 6.355  | -3.656 | 0.000319724 | 0.000928573 | -0.494 | Down |
| C12orf49  | -1.669 | 9.113  | -3.649 | 0.000327955 | 0.000945096 | -0.518 | Down |
| NCALD     | -1.853 | 8.777  | -3.641 | 0.000337979 | 0.00097166  | -0.546 | Down |
| TXNRD1    | -2.625 | 9.337  | -3.641 | 0.00033848  | 0.00097166  | -0.547 | Down |
| SUOX      | -1.309 | 8.597  | -3.639 | 0.000341182 | 0.000973778 | -0.555 | Down |
| RFC2      | -1.063 | 8.975  | -3.627 | 0.000356316 | 0.001013065 | -0.595 | Down |

|          |        |        |        |             |             |        |      |
|----------|--------|--------|--------|-------------|-------------|--------|------|
| SYNJ2    | -1.075 | 8.770  | -3.620 | 0.000365344 | 0.001032827 | -0.618 | Down |
| DIP2C    | -1.258 | 9.448  | -3.597 | 0.000397635 | 0.001113529 | -0.697 | Down |
| PDE4D    | -1.674 | 7.266  | -3.581 | 0.000421042 | 0.001176861 | -0.751 | Down |
| SLC44A4  | -2.287 | 5.964  | -3.548 | 0.000474109 | 0.001320224 | -0.861 | Down |
| MOCS1    | -1.145 | 7.555  | -3.534 | 0.000497682 | 0.001383277 | -0.906 | Down |
| ELOVL5   | -1.758 | 10.299 | -3.532 | 0.000501222 | 0.001390511 | -0.913 | Down |
| PRDM11   | -1.369 | 7.404  | -3.529 | 0.000506854 | 0.001403524 | -0.923 | Down |
| NID1     | -1.187 | 7.675  | -3.492 | 0.000578028 | 0.001594671 | -1.045 | Down |
| TYMS     | -1.432 | 11.835 | -3.484 | 0.000595849 | 0.001637758 | -1.074 | Down |
| ERBB3    | -1.390 | 9.885  | -3.477 | 0.000610984 | 0.001673174 | -1.097 | Down |
| MOG      | -1.820 | 6.683  | -3.470 | 0.000625095 | 0.001705535 | -1.118 | Down |
| MCF2     | -2.077 | 5.626  | -3.464 | 0.000637867 | 0.001737196 | -1.137 | Down |
| RHOF     | -1.129 | 8.370  | -3.461 | 0.000646619 | 0.00175781  | -1.149 | Down |
| GPR6     | -2.057 | 4.966  | -3.452 | 0.000665398 | 0.001797397 | -1.176 | Down |
| BNC1     | -1.913 | 6.472  | -3.452 | 0.000666016 | 0.001797397 | -1.177 | Down |
| ALPL     | -1.386 | 6.869  | -3.443 | 0.000688086 | 0.001849669 | -1.207 | Down |
| LYST     | -1.067 | 9.273  | -3.441 | 0.000693447 | 0.001851266 | -1.214 | Down |
| SCN1A    | -2.358 | 4.164  | -3.435 | 0.000708693 | 0.001878478 | -1.234 | Down |
| AKRIC1   | -2.385 | 9.630  | -3.411 | 0.000770233 | 0.002027143 | -1.312 | Down |
| CEP112   | -1.383 | 6.445  | -3.408 | 0.000778129 | 0.002044308 | -1.321 | Down |
| DLEU2    | -1.031 | 7.546  | -3.383 | 0.000848178 | 0.002212702 | -1.401 | Down |
| B4GALNT1 | -1.492 | 7.481  | -3.369 | 0.00088865  | 0.002306149 | -1.444 | Down |
| SP140L   | -1.458 | 8.115  | -3.353 | 0.000941429 | 0.002430392 | -1.497 | Down |
| ZNF451   | -1.109 | 8.797  | -3.348 | 0.000956042 | 0.002459575 | -1.511 | Down |
| CD55     | -1.219 | 9.828  | -3.307 | 0.001098996 | 0.002803099 | -1.640 | Down |
| RAP2A    | -1.480 | 10.334 | -3.294 | 0.00114899  | 0.002910644 | -1.681 | Down |
| GSTCD    | -1.297 | 7.488  | -3.293 | 0.001153857 | 0.002918001 | -1.685 | Down |
| STAP1    | -2.255 | 6.308  | -3.281 | 0.001202106 | 0.003024588 | -1.723 | Down |
| ALDH3B1  | -1.301 | 7.933  | -3.275 | 0.001226531 | 0.003077603 | -1.741 | Down |
| SLC6A11  | -1.873 | 5.159  | -3.273 | 0.00123377  | 0.003088579 | -1.747 | Down |
| PAPPA    | -1.397 | 6.645  | -3.267 | 0.001261068 | 0.003141052 | -1.767 | Down |
| BTG4     | -1.588 | 4.207  | -3.244 | 0.001362482 | 0.003376685 | -1.838 | Down |
| FAM208B  | -1.157 | 9.845  | -3.240 | 0.001380125 | 0.003414718 | -1.850 | Down |
| EBF2     | -1.768 | 5.783  | -3.226 | 0.001444204 | 0.003567329 | -1.892 | Down |
| CBY1     | -1.124 | 9.267  | -3.213 | 0.001509604 | 0.003710382 | -1.932 | Down |
| C6orf123 | -1.469 | 6.798  | -3.208 | 0.001535954 | 0.003768916 | -1.948 | Down |
| KCNQ3    | -1.139 | 7.317  | -3.178 | 0.001692855 | 0.004126681 | -2.037 | Down |
| IDH1     | -1.019 | 10.959 | -3.171 | 0.001732319 | 0.00421597  | -2.059 | Down |
| SSBP1    | -1.109 | 10.950 | -3.110 | 0.00211528  | 0.005089678 | -2.242 | Down |
| HOMER2   | -1.305 | 8.182  | -3.104 | 0.002159749 | 0.005186559 | -2.261 | Down |
| ARVCF    | -1.235 | 8.453  | -3.082 | 0.002319581 | 0.005518747 | -2.326 | Down |
| NEDD9    | -1.220 | 8.120  | -3.041 | 0.002646556 | 0.006197526 | -2.446 | Down |
| ARHGEF12 | -1.151 | 9.302  | -3.030 | 0.002733362 | 0.006360735 | -2.476 | Down |
| ARPP21   | -1.549 | 4.215  | -3.023 | 0.002801174 | 0.0064982   | -2.498 | Down |
| MYLK3    | -1.739 | 4.910  | -3.019 | 0.00283411  | 0.006543977 | -2.509 | Down |

|          |        |        |        |             |             |        |      |
|----------|--------|--------|--------|-------------|-------------|--------|------|
| RBFOX1   | -1.510 | 6.440  | -3.011 | 0.002902616 | 0.006691768 | -2.530 | Down |
| VRK3     | -1.055 | 8.714  | -2.991 | 0.003092006 | 0.007117359 | -2.588 | Down |
| BCL2L14  | -1.215 | 8.561  | -2.982 | 0.003182728 | 0.007292321 | -2.614 | Down |
| IL16     | -1.018 | 8.871  | -2.980 | 0.003202741 | 0.007326886 | -2.620 | Down |
| RGR      | -1.817 | 6.436  | -2.967 | 0.003337522 | 0.007600145 | -2.657 | Down |
| PTK2     | -1.253 | 10.081 | -2.951 | 0.003509413 | 0.007967171 | -2.703 | Down |
| GLS2     | -1.294 | 6.120  | -2.946 | 0.003561811 | 0.008037046 | -2.716 | Down |
| VNN3     | -1.670 | 5.716  | -2.945 | 0.003578121 | 0.008058681 | -2.720 | Down |
| GVINP1   | -1.070 | 8.106  | -2.942 | 0.003605897 | 0.00809965  | -2.727 | Down |
| GABRB1   | -1.450 | 6.441  | -2.941 | 0.003624646 | 0.008129485 | -2.732 | Down |
| SLC1A6   | -1.363 | 5.041  | -2.932 | 0.003725313 | 0.008317629 | -2.757 | Down |
| CNDP2    | -1.117 | 10.634 | -2.927 | 0.003776613 | 0.008415807 | -2.769 | Down |
| POSTN    | -2.357 | 10.900 | -2.927 | 0.003780604 | 0.008415807 | -2.770 | Down |
| SNTG1    | -1.318 | 6.512  | -2.926 | 0.003792862 | 0.008430471 | -2.773 | Down |
| HIF3A    | -1.267 | 6.976  | -2.918 | 0.003890544 | 0.008621817 | -2.796 | Down |
| CA6      | -1.872 | 6.813  | -2.879 | 0.004384739 | 0.009616676 | -2.905 | Down |
| FHL5     | -1.775 | 5.607  | -2.852 | 0.004757542 | 0.010373115 | -2.978 | Down |
| KCNIP2   | -1.323 | 6.733  | -2.840 | 0.004925516 | 0.010705144 | -3.010 | Down |
| ABCC4    | -1.482 | 7.052  | -2.840 | 0.004931631 | 0.010705144 | -3.011 | Down |
| TTBK2    | -1.182 | 6.625  | -2.811 | 0.005388936 | 0.011546611 | -3.091 | Down |
| TLE6     | -1.014 | 6.729  | -2.805 | 0.005476174 | 0.011699815 | -3.105 | Down |
| SLC11A1  | -1.770 | 8.358  | -2.796 | 0.00563061  | 0.012012506 | -3.130 | Down |
| EDIL3    | -1.166 | 6.812  | -2.792 | 0.005700832 | 0.012144895 | -3.141 | Down |
| MBD1     | -1.093 | 9.255  | -2.789 | 0.005753283 | 0.012239101 | -3.150 | Down |
| LITAF    | -2.129 | 10.759 | -2.775 | 0.005984903 | 0.012659389 | -3.185 | Down |
| SLC38A4  | -1.527 | 4.849  | -2.735 | 0.006743722 | 0.014123822 | -3.292 | Down |
| RAPGEF6  | -1.026 | 8.052  | -2.684 | 0.007824054 | 0.01606957  | -3.425 | Down |
| CELF2    | -1.149 | 9.867  | -2.678 | 0.007953918 | 0.016313759 | -3.440 | Down |
| DST      | -1.149 | 9.300  | -2.663 | 0.00831351  | 0.01698103  | -3.479 | Down |
| BICD1    | -1.213 | 7.895  | -2.649 | 0.008652778 | 0.017625591 | -3.515 | Down |
| DOCK5    | -1.085 | 7.351  | -2.614 | 0.009553316 | 0.019301332 | -3.603 | Down |
| POLR1B   | -1.257 | 9.098  | -2.606 | 0.009785802 | 0.019744216 | -3.625 | Down |
| GATA4    | -1.504 | 4.913  | -2.597 | 0.010046979 | 0.02024371  | -3.648 | Down |
| TNPO1    | -1.270 | 10.887 | -2.585 | 0.01037647  | 0.020822957 | -3.677 | Down |
| PIEZO2   | -1.050 | 7.521  | -2.561 | 0.011117953 | 0.022220962 | -3.738 | Down |
| CADPS    | -1.186 | 6.159  | -2.548 | 0.011502572 | 0.022928048 | -3.768 | Down |
| HBB      | -3.236 | 13.381 | -2.485 | 0.013679059 | 0.027084901 | -3.921 | Down |
| SHANK2   | -1.119 | 8.358  | -2.484 | 0.013719637 | 0.027129122 | -3.924 | Down |
| ADAM22   | -1.281 | 7.566  | -2.460 | 0.01467511  | 0.028750841 | -3.983 | Down |
| PADI2    | -1.097 | 10.255 | -2.428 | 0.015976912 | 0.030814096 | -4.058 | Down |
| SLC4A1   | -1.958 | 6.925  | -2.392 | 0.017602438 | 0.033643734 | -4.142 | Down |
| HIST1H1T | -1.337 | 5.127  | -2.388 | 0.017760079 | 0.03390146  | -4.150 | Down |
| SCIN     | -1.223 | 6.672  | -2.368 | 0.018721686 | 0.035645515 | -4.196 | Down |
| CLCNKB   | -1.108 | 5.048  | -2.344 | 0.019945113 | 0.037829569 | -4.251 | Down |
| FGF22    | -1.212 | 5.956  | -2.320 | 0.021239007 | 0.040028395 | -4.306 | Down |



|         |        |       |        |             |             |        |      |
|---------|--------|-------|--------|-------------|-------------|--------|------|
| PPFIA2  | -1.093 | 5.786 | -2.315 | 0.02154438  | 0.040399109 | -4.319 | Down |
| SLC18A2 | -1.377 | 4.643 | -2.266 | 0.024429602 | 0.044958933 | -4.427 | Down |
| JMJD6   | -1.015 | 8.772 | -2.260 | 0.024789678 | 0.045508952 | -4.440 | Down |
| TLL1    | -1.054 | 5.565 | -2.237 | 0.026309127 | 0.048061022 | -4.491 | Down |
| SPOCK3  | -1.491 | 4.891 | -2.223 | 0.02723417  | 0.049628935 | -4.521 | Down |

**Table S5. Significant genes for the prediction of pCR rate**

| Gene   | OR    | Low.95.CI | High.95.CI | P.value |
|--------|-------|-----------|------------|---------|
| ATP4B  | 0.669 | 0.523     | 0.856      | 0.001   |
| FBXO22 | 1.372 | 1.141     | 1.649      | 0.001   |
| SMEK2  | 1.456 | 1.072     | 1.977      | 0.016   |
| FCN2   | 0.751 | 0.592     | 0.951      | 0.018   |
| RRP8   | 1.512 | 1.051     | 2.175      | 0.026   |
| TET3   | 1.361 | 1.034     | 1.792      | 0.028   |

**Table S6. Results of binary logistic regression analysis**

| Variables      | P.Value   |
|----------------|-----------|
| Age            | 0.839     |
| Clinical stage |           |
| I              | Reference |
| IIA            | 0.898     |
| IIB            | 0.724     |
| IIIA           | 0.395     |
| IIIB           | 0.248     |
| IIIC           | 0.716     |
| T stage        |           |
| T1             | Reference |
| T2             | 0.113     |
| T3             | 0.007     |
| T4             | 0.026     |
| Nodal status   |           |
| Negative       | Reference |
| Positive       | 0.279     |
| Grade          |           |
| Grade1         | Reference |
| Grade2         | 0.182     |
| Grade3         | 0.065     |
| pRS            | <0.0001   |

**Table S7. Differentially expressed genes of high pRS low pRS group**

| Gene    | logFC | AveExpr | t     | P.Value  | adj.P.Val | B      | threshold |
|---------|-------|---------|-------|----------|-----------|--------|-----------|
| GIT2    | 1.376 | 5.944   | 7.404 | 2.73E-12 | 2.05E-09  | 17.501 | Up        |
| DYNC1H1 | 1.214 | 10.082  | 7.403 | 2.75E-12 | 2.05E-09  | 17.493 | Up        |
| FN1     | 1.469 | 12.424  | 7.213 | 8.59E-12 | 2.30E-09  | 16.398 | Up        |
| CNPY2   | 1.074 | 10.798  | 7.078 | 1.91E-11 | 4.06E-09  | 15.629 | Up        |
| PTPN11  | 1.136 | 10.243  | 6.986 | 3.28E-11 | 6.10E-09  | 15.109 | Up        |
| STOML1  | 1.108 | 7.961   | 6.846 | 7.39E-11 | 1.01E-08  | 14.328 | Up        |
| CMTM6   | 1.836 | 10.561  | 6.843 | 7.50E-11 | 1.01E-08  | 14.315 | Up        |
| DIAPH1  | 1.336 | 9.108   | 6.636 | 2.45E-10 | 2.28E-08  | 13.177 | Up        |
| LEPROT  | 1.872 | 9.973   | 6.589 | 3.19E-10 | 2.56E-08  | 12.924 | Up        |
| ROCK1   | 1.241 | 9.852   | 6.364 | 1.12E-09 | 6.16E-08  | 11.721 | Up        |
| FAM189B | 1.646 | 9.116   | 6.253 | 2.04E-09 | 1.07E-07  | 11.143 | Up        |
| PHIP    | 1.312 | 9.514   | 6.250 | 2.09E-09 | 1.07E-07  | 11.123 | Up        |
| PABPC1  | 1.331 | 14.264  | 6.125 | 4.10E-09 | 1.69E-07  | 10.477 | Up        |
| EEF1A1  | 2.105 | 14.942  | 6.104 | 4.59E-09 | 1.80E-07  | 10.369 | Up        |
| KPNA4   | 1.375 | 7.931   | 6.091 | 4.91E-09 | 1.87E-07  | 10.304 | Up        |
| PRSS23  | 1.336 | 8.319   | 6.066 | 5.61E-09 | 1.99E-07  | 10.177 | Up        |
| TPM1    | 1.022 | 11.448  | 6.028 | 6.88E-09 | 2.27E-07  | 9.981  | Up        |
| UBR4    | 1.180 | 9.429   | 5.978 | 8.94E-09 | 2.71E-07  | 9.731  | Up        |
| CCNG2   | 1.221 | 9.290   | 5.961 | 9.78E-09 | 2.81E-07  | 9.645  | Up        |
| AKAP12  | 1.221 | 7.014   | 5.957 | 1.00E-08 | 2.81E-07  | 9.623  | Up        |
| TUBA1B  | 2.114 | 13.659  | 5.934 | 1.13E-08 | 3.06E-07  | 9.505  | Up        |
| TNPO1   | 1.160 | 10.887  | 5.898 | 1.36E-08 | 3.44E-07  | 9.329  | Up        |
| ANXA2   | 1.254 | 13.283  | 5.898 | 1.37E-08 | 3.44E-07  | 9.326  | Up        |
| RPS15   | 1.678 | 13.631  | 5.846 | 1.79E-08 | 4.22E-07  | 9.069  | Up        |
| A2M     | 1.333 | 11.007  | 5.746 | 3.00E-08 | 6.28E-07  | 8.575  | Up        |
| WDR3    | 1.117 | 9.059   | 5.719 | 3.45E-08 | 7.13E-07  | 8.440  | Up        |
| MEX3C   | 1.169 | 8.127   | 5.707 | 3.67E-08 | 7.37E-07  | 8.383  | Up        |
| MMP2    | 1.166 | 9.081   | 5.662 | 4.61E-08 | 8.81E-07  | 8.163  | Up        |
| SSPN    | 1.098 | 7.376   | 5.550 | 8.13E-08 | 1.46E-06  | 7.623  | Up        |
| HOPX    | 1.132 | 7.998   | 5.525 | 9.19E-08 | 1.59E-06  | 7.507  | Up        |
| ALG5    | 1.205 | 9.823   | 5.486 | 1.12E-07 | 1.89E-06  | 7.318  | Up        |
| VIM     | 1.315 | 13.257  | 5.454 | 1.31E-07 | 2.08E-06  | 7.169  | Up        |
| RCBTB2  | 1.173 | 7.514   | 5.413 | 1.61E-07 | 2.44E-06  | 6.972  | Up        |
| RPS9    | 1.606 | 12.465  | 5.409 | 1.64E-07 | 2.46E-06  | 6.958  | Up        |
| TMED5   | 1.086 | 9.879   | 5.405 | 1.67E-07 | 2.49E-06  | 6.937  | Up        |
| EIF4G2  | 1.308 | 12.143  | 5.336 | 2.34E-07 | 3.19E-06  | 6.617  | Up        |
| RNH1    | 1.253 | 9.947   | 5.294 | 2.87E-07 | 3.71E-06  | 6.422  | Up        |
| STMN1   | 1.121 | 9.089   | 5.201 | 4.51E-07 | 5.32E-06  | 5.994  | Up        |
| BTG3    | 1.095 | 10.019  | 5.161 | 5.46E-07 | 6.15E-06  | 5.812  | Up        |
| EMP1    | 1.147 | 9.480   | 5.120 | 6.63E-07 | 7.01E-06  | 5.629  | Up        |

|          |        |        |        |             |             |        |       |
|----------|--------|--------|--------|-------------|-------------|--------|-------|
| TXNRD1   | 1.701  | 9.337  | 5.087  | 7.75E-07    | 7.79E-06    | 5.480  | Up    |
| CTTN     | 1.680  | 10.261 | 5.032  | 1.00E-06    | 9.58E-06    | 5.234  | Up    |
| RAP1A    | 1.163  | 9.689  | 4.981  | 1.27E-06    | 1.17E-05    | 5.011  | Up    |
| ELOVL5   | 1.010  | 10.299 | 4.965  | 1.37E-06    | 1.25E-05    | 4.938  | Up    |
| LGALS3   | 1.357  | 11.952 | 4.942  | 1.52E-06    | 1.34E-05    | 4.840  | Up    |
| STK24    | 1.245  | 11.463 | 4.802  | 2.89E-06    | 2.29E-05    | 4.234  | Up    |
| FUT6     | 1.070  | 9.630  | 4.633  | 6.14E-06    | 4.33E-05    | 3.523  | Up    |
| WNK1     | 1.027  | 9.787  | 4.598  | 7.16E-06    | 4.91E-05    | 3.378  | Up    |
| ERGIC3   | 1.057  | 10.543 | 4.481  | 1.19E-05    | 7.53E-05    | 2.900  | Up    |
| UBXN4    | 1.067  | 10.366 | 4.382  | 1.82E-05    | 0.000106422 | 2.502  | Up    |
| ACAN     | 1.071  | 8.315  | 4.316  | 2.39E-05    | 0.000131898 | 2.244  | Up    |
| PTPRO    | 1.903  | 11.908 | 4.244  | 3.23E-05    | 0.000170731 | 1.965  | Up    |
| LITAF    | 1.445  | 10.759 | 4.224  | 3.51E-05    | 0.000182543 | 1.886  | Up    |
| SLC11A1  | 1.171  | 8.358  | 4.044  | 7.25E-05    | 0.000331573 | 1.209  | Up    |
| SOX3     | 1.012  | 5.881  | 3.956  | 0.000102613 | 0.000444858 | 0.885  | Up    |
| CLU      | 1.227  | 10.016 | 3.857  | 0.000150588 | 0.000600332 | 0.529  | Up    |
| CRABP1   | 1.012  | 8.815  | 2.869  | 0.004511283 | 0.010997177 | -2.576 | Up    |
| BBX      | 0.571  | 9.457  | 7.324  | 4.43E-12    | 2.20E-09    | 17.035 | NoSig |
| G3BP1    | 0.860  | 10.222 | 7.251  | 6.85E-12    | 2.30E-09    | 16.616 | NoSig |
| ZKSCAN3  | -0.901 | 8.416  | -7.200 | 9.29E-12    | 2.30E-09    | 16.323 | NoSig |
| ZNF292   | 0.782  | 9.375  | 6.853  | 7.09E-11    | 1.01E-08    | 14.369 | NoSig |
| DCTN5    | -0.659 | 9.042  | -6.810 | 9.10E-11    | 1.12E-08    | 14.129 | NoSig |
| MCFD2    | 0.735  | 8.983  | 6.763  | 1.18E-10    | 1.26E-08    | 13.875 | NoSig |
| CEP164   | -0.975 | 8.782  | -6.635 | 2.46E-10    | 2.28E-08    | 13.175 | NoSig |
| TTN      | -0.769 | 7.736  | -6.535 | 4.32E-10    | 3.21E-08    | 12.633 | NoSig |
| N4BP2L2  | 0.905  | 9.731  | 6.440  | 7.31E-10    | 4.73E-08    | 12.128 | NoSig |
| SPG11    | 0.973  | 8.942  | 6.387  | 9.82E-10    | 5.81E-08    | 11.846 | NoSig |
| BICD2    | 0.910  | 8.636  | 6.384  | 9.98E-10    | 5.81E-08    | 11.830 | NoSig |
| GGNBP2   | 0.838  | 9.356  | 6.233  | 2.28E-09    | 1.13E-07    | 11.038 | NoSig |
| CLTA     | 0.851  | 11.698 | 6.198  | 2.76E-09    | 1.32E-07    | 10.855 | NoSig |
| ARMC8    | -0.608 | 9.032  | -6.159 | 3.42E-09    | 1.54E-07    | 10.651 | NoSig |
| SMC3     | 0.696  | 9.067  | 6.146  | 3.66E-09    | 1.60E-07    | 10.586 | NoSig |
| SLC38A10 | 0.909  | 9.175  | 6.132  | 3.95E-09    | 1.68E-07    | 10.514 | NoSig |
| PTCH1    | 0.935  | 7.362  | 6.105  | 4.55E-09    | 1.80E-07    | 10.378 | NoSig |
| RHOA     | -0.630 | 13.246 | -6.079 | 5.22E-09    | 1.91E-07    | 10.245 | NoSig |
| DCAF8    | -0.506 | 9.171  | -6.059 | 5.84E-09    | 2.02E-07    | 10.138 | NoSig |
| TXLNG    | -0.954 | 7.314  | -5.985 | 8.65E-09    | 2.71E-07    | 9.763  | NoSig |
| BECN1    | 0.682  | 9.508  | 5.982  | 8.76E-09    | 2.71E-07    | 9.750  | NoSig |
| NDUFS4   | 0.751  | 9.565  | 5.964  | 9.65E-09    | 2.81E-07    | 9.658  | NoSig |
| MOCS1    | -0.746 | 7.555  | -5.939 | 1.10E-08    | 3.03E-07    | 9.532  | NoSig |
| CKAP5    | -0.591 | 10.041 | -5.923 | 1.20E-08    | 3.17E-07    | 9.453  | NoSig |
| CELF1    | 0.570  | 11.038 | 5.907  | 1.30E-08    | 3.40E-07    | 9.371  | NoSig |
| DNAJA4   | -0.547 | 9.593  | -5.892 | 1.40E-08    | 3.48E-07    | 9.299  | NoSig |
| PDHA1    | -0.818 | 11.248 | -5.879 | 1.50E-08    | 3.67E-07    | 9.234  | NoSig |
| DNAJC2   | 0.954  | 9.783  | 5.853  | 1.73E-08    | 4.14E-07    | 9.102  | NoSig |

|          |        |        |        |          |          |       |       |
|----------|--------|--------|--------|----------|----------|-------|-------|
| PALLD    | 0.830  | 10.842 | 5.843  | 1.82E-08 | 4.22E-07 | 9.053 | NoSig |
| SUPT6H   | -0.472 | 9.463  | -5.840 | 1.85E-08 | 4.22E-07 | 9.038 | NoSig |
| SUZ12    | 0.677  | 10.035 | 5.801  | 2.26E-08 | 5.10E-07 | 8.843 | NoSig |
| CKAP2    | 0.772  | 8.853  | 5.784  | 2.46E-08 | 5.47E-07 | 8.763 | NoSig |
| CCDC7    | -0.726 | 7.809  | -5.777 | 2.56E-08 | 5.60E-07 | 8.726 | NoSig |
| CACNA1D  | -0.791 | 7.546  | -5.767 | 2.69E-08 | 5.80E-07 | 8.678 | NoSig |
| POLR2B   | -0.733 | 11.307 | -5.759 | 2.80E-08 | 5.95E-07 | 8.640 | NoSig |
| SRGAP3   | -0.642 | 8.202  | -5.705 | 3.71E-08 | 7.37E-07 | 8.372 | NoSig |
| STXBP3   | 0.778  | 8.417  | 5.704  | 3.72E-08 | 7.37E-07 | 8.369 | NoSig |
| C4orf27  | 0.674  | 9.349  | 5.697  | 3.86E-08 | 7.55E-07 | 8.334 | NoSig |
| ZNF573   | 0.884  | 7.373  | 5.662  | 4.62E-08 | 8.81E-07 | 8.162 | NoSig |
| PIK3R2   | -0.697 | 8.284  | -5.612 | 5.96E-08 | 1.12E-06 | 7.920 | NoSig |
| HSD17B4  | 0.705  | 9.490  | 5.585  | 6.83E-08 | 1.27E-06 | 7.790 | NoSig |
| CRYZL1   | -0.717 | 8.177  | -5.578 | 7.06E-08 | 1.30E-06 | 7.758 | NoSig |
| KRAS     | 0.862  | 10.224 | 5.575  | 7.15E-08 | 1.30E-06 | 7.746 | NoSig |
| SYF2     | 0.966  | 8.969  | 5.543  | 8.43E-08 | 1.49E-06 | 7.590 | NoSig |
| PRR14L   | -0.840 | 8.622  | -5.540 | 8.54E-08 | 1.49E-06 | 7.577 | NoSig |
| HNRNPM   | -0.742 | 11.876 | -5.512 | 9.85E-08 | 1.68E-06 | 7.441 | NoSig |
| MRPS27   | 0.770  | 8.933  | 5.466  | 1.24E-07 | 2.02E-06 | 7.223 | NoSig |
| PSIP1    | 0.834  | 9.581  | 5.466  | 1.24E-07 | 2.02E-06 | 7.222 | NoSig |
| TGFB3    | 0.969  | 8.420  | 5.465  | 1.24E-07 | 2.02E-06 | 7.218 | NoSig |
| CARS2    | 0.991  | 9.435  | 5.454  | 1.32E-07 | 2.08E-06 | 7.165 | NoSig |
| ADCY7    | 0.805  | 8.082  | 5.437  | 1.42E-07 | 2.23E-06 | 7.090 | NoSig |
| PLXNA1   | 0.700  | 8.948  | 5.426  | 1.51E-07 | 2.33E-06 | 7.037 | NoSig |
| DDX42    | -0.627 | 10.405 | -5.422 | 1.54E-07 | 2.36E-06 | 7.015 | NoSig |
| MLLT10   | -0.520 | 8.761  | -5.396 | 1.75E-07 | 2.57E-06 | 6.895 | NoSig |
| LMF1     | 0.995  | 6.745  | 5.380  | 1.89E-07 | 2.76E-06 | 6.819 | NoSig |
| CD80     | -0.594 | 8.572  | -5.377 | 1.92E-07 | 2.77E-06 | 6.806 | NoSig |
| SPTLC1   | 0.675  | 10.238 | 5.369  | 2.00E-07 | 2.85E-06 | 6.769 | NoSig |
| NDUFB6   | 0.960  | 10.442 | 5.356  | 2.13E-07 | 3.02E-06 | 6.706 | NoSig |
| KIAA1109 | -0.755 | 8.391  | -5.347 | 2.22E-07 | 3.12E-06 | 6.667 | NoSig |
| RAP2A    | 0.987  | 10.334 | 5.345  | 2.24E-07 | 3.12E-06 | 6.658 | NoSig |
| CHERP    | 0.691  | 9.729  | 5.342  | 2.28E-07 | 3.14E-06 | 6.642 | NoSig |
| IST1     | 0.556  | 10.684 | 5.330  | 2.42E-07 | 3.27E-06 | 6.585 | NoSig |
| RSU1     | 0.891  | 10.193 | 5.316  | 2.59E-07 | 3.44E-06 | 6.522 | NoSig |
| RHOQ     | 0.849  | 10.226 | 5.316  | 2.59E-07 | 3.44E-06 | 6.521 | NoSig |
| ZNF286A  | -0.756 | 7.875  | -5.300 | 2.80E-07 | 3.65E-06 | 6.447 | NoSig |
| FSTL4    | -0.618 | 5.855  | -5.269 | 3.25E-07 | 4.14E-06 | 6.304 | NoSig |
| GOLGA3   | 0.599  | 9.004  | 5.267  | 3.28E-07 | 4.14E-06 | 6.296 | NoSig |
| PHC3     | -0.772 | 7.215  | -5.252 | 3.53E-07 | 4.38E-06 | 6.227 | NoSig |
| GEMIN7   | -0.753 | 7.288  | -5.251 | 3.54E-07 | 4.38E-06 | 6.225 | NoSig |
| TP73     | -0.871 | 4.189  | -5.237 | 3.79E-07 | 4.65E-06 | 6.160 | NoSig |
| ZNF7     | 0.707  | 8.448  | 5.221  | 4.10E-07 | 4.97E-06 | 6.085 | NoSig |
| C11orf58 | 0.837  | 10.933 | 5.220  | 4.11E-07 | 4.97E-06 | 6.082 | NoSig |
| CNKS2    | -0.953 | 6.546  | -5.210 | 4.31E-07 | 5.17E-06 | 6.036 | NoSig |

|          |        |        |        |          |          |       |       |
|----------|--------|--------|--------|----------|----------|-------|-------|
| RPS24    | 0.943  | 14.428 | 5.202  | 4.49E-07 | 5.32E-06 | 5.998 | NoSig |
| EDIL3    | -0.746 | 6.812  | -5.191 | 4.72E-07 | 5.52E-06 | 5.951 | NoSig |
| MCTS1    | 0.661  | 9.930  | 5.188  | 4.80E-07 | 5.58E-06 | 5.934 | NoSig |
| TLR4     | -0.581 | 8.215  | -5.182 | 4.93E-07 | 5.68E-06 | 5.909 | NoSig |
| LIG3     | -0.754 | 8.434  | -5.172 | 5.17E-07 | 5.91E-06 | 5.864 | NoSig |
| DDX3X    | 0.565  | 11.351 | 5.144  | 5.91E-07 | 6.51E-06 | 5.737 | NoSig |
| SERPINC1 | -0.702 | 4.050  | -5.136 | 6.15E-07 | 6.71E-06 | 5.700 | NoSig |
| PARP11   | -0.951 | 6.273  | -5.135 | 6.18E-07 | 6.71E-06 | 5.695 | NoSig |
| HEXA     | 0.726  | 9.617  | 5.133  | 6.23E-07 | 6.71E-06 | 5.687 | NoSig |
| C2       | 0.973  | 8.484  | 5.123  | 6.53E-07 | 6.99E-06 | 5.642 | NoSig |
| PDS5B    | 0.545  | 8.846  | 5.118  | 6.70E-07 | 7.01E-06 | 5.618 | NoSig |
| GTF3C3   | 0.604  | 8.636  | 5.118  | 6.70E-07 | 7.01E-06 | 5.618 | NoSig |
| SQLE     | 0.722  | 10.396 | 5.116  | 6.75E-07 | 7.01E-06 | 5.612 | NoSig |
| GSTCD    | -0.680 | 7.488  | -5.109 | 6.97E-07 | 7.19E-06 | 5.581 | NoSig |
| CSNK1A1  | 0.483  | 11.439 | 5.098  | 7.35E-07 | 7.48E-06 | 5.531 | NoSig |
| MACF1    | 0.641  | 10.452 | 5.090  | 7.65E-07 | 7.74E-06 | 5.493 | NoSig |
| CLCNKB   | -0.841 | 5.048  | -5.061 | 8.77E-07 | 8.68E-06 | 5.363 | NoSig |
| KIAA0226 | 0.397  | 8.923  | 5.060  | 8.82E-07 | 8.68E-06 | 5.358 | NoSig |
| MFN2     | 0.767  | 9.555  | 5.051  | 9.19E-07 | 8.97E-06 | 5.318 | NoSig |
| CACNB2   | -0.610 | 7.228  | -5.050 | 9.23E-07 | 8.97E-06 | 5.315 | NoSig |
| ATM      | -0.557 | 9.117  | -5.041 | 9.63E-07 | 9.24E-06 | 5.274 | NoSig |
| SLC4A1AP | -0.411 | 9.429  | -5.041 | 9.63E-07 | 9.24E-06 | 5.274 | NoSig |
| IPP      | -0.689 | 7.920  | -5.029 | 1.02E-06 | 9.62E-06 | 5.223 | NoSig |
| ZMYM3    | -0.421 | 9.377  | -5.002 | 1.16E-06 | 1.08E-05 | 5.100 | NoSig |
| PIEZO1   | 0.971  | 9.417  | 5.001  | 1.16E-06 | 1.08E-05 | 5.100 | NoSig |
| RQCD1    | -0.337 | 9.983  | -4.998 | 1.18E-06 | 1.09E-05 | 5.084 | NoSig |
| ZNF75D   | -0.471 | 8.046  | -4.957 | 1.42E-06 | 1.29E-05 | 4.904 | NoSig |
| CEP70    | -0.583 | 8.617  | -4.956 | 1.43E-06 | 1.29E-05 | 4.899 | NoSig |
| JRKL     | 0.846  | 7.803  | 4.953  | 1.45E-06 | 1.30E-05 | 4.889 | NoSig |
| LPAR6    | 0.721  | 8.748  | 4.950  | 1.47E-06 | 1.31E-05 | 4.875 | NoSig |
| GDAP2    | -0.371 | 8.085  | -4.948 | 1.48E-06 | 1.31E-05 | 4.866 | NoSig |
| LUC7L    | -0.794 | 8.713  | -4.933 | 1.59E-06 | 1.39E-05 | 4.799 | NoSig |
| SNRPB2   | 0.886  | 10.385 | 4.920  | 1.69E-06 | 1.46E-05 | 4.741 | NoSig |
| DDX10    | 0.679  | 9.262  | 4.916  | 1.72E-06 | 1.48E-05 | 4.724 | NoSig |
| PLXND1   | 0.768  | 9.906  | 4.915  | 1.73E-06 | 1.48E-05 | 4.720 | NoSig |
| AVL9     | 0.666  | 8.732  | 4.904  | 1.82E-06 | 1.54E-05 | 4.673 | NoSig |
| PERP     | 0.951  | 10.542 | 4.876  | 2.07E-06 | 1.73E-05 | 4.550 | NoSig |
| PSMD6    | 0.632  | 10.776 | 4.861  | 2.21E-06 | 1.82E-05 | 4.488 | NoSig |
| VPS35    | 0.804  | 11.249 | 4.840  | 2.43E-06 | 2.00E-05 | 4.397 | NoSig |
| SREBF1   | 0.690  | 9.137  | 4.833  | 2.51E-06 | 2.05E-05 | 4.368 | NoSig |
| EFCAB6   | -0.888 | 4.314  | -4.823 | 2.63E-06 | 2.14E-05 | 4.323 | NoSig |
| SMCHD1   | -0.716 | 9.364  | -4.819 | 2.67E-06 | 2.16E-05 | 4.308 | NoSig |
| ATP5O    | 0.867  | 11.788 | 4.816  | 2.72E-06 | 2.19E-05 | 4.292 | NoSig |
| PDE8A    | -0.439 | 8.943  | -4.811 | 2.78E-06 | 2.22E-05 | 4.270 | NoSig |
| LPP      | 0.535  | 10.227 | 4.803  | 2.88E-06 | 2.29E-05 | 4.237 | NoSig |

|          |        |        |        |          |          |       |       |
|----------|--------|--------|--------|----------|----------|-------|-------|
| MGA      | 0.890  | 6.658  | 4.800  | 2.92E-06 | 2.30E-05 | 4.223 | NoSig |
| TOR1A    | 0.765  | 8.732  | 4.798  | 2.94E-06 | 2.30E-05 | 4.218 | NoSig |
| RTN4     | 0.583  | 12.325 | 4.796  | 2.97E-06 | 2.31E-05 | 4.210 | NoSig |
| HSPA6    | -0.768 | 9.429  | -4.792 | 3.03E-06 | 2.35E-05 | 4.189 | NoSig |
| ARL3     | 0.648  | 8.931  | 4.779  | 3.21E-06 | 2.48E-05 | 4.134 | NoSig |
| CTBP1    | 0.526  | 10.800 | 4.770  | 3.34E-06 | 2.56E-05 | 4.097 | NoSig |
| ATP5H    | 0.754  | 12.044 | 4.742  | 3.79E-06 | 2.89E-05 | 3.978 | NoSig |
| DNTT     | -0.662 | 4.182  | -4.733 | 3.95E-06 | 2.98E-05 | 3.939 | NoSig |
| MRPL23   | 0.822  | 9.087  | 4.728  | 4.03E-06 | 3.03E-05 | 3.919 | NoSig |
| SRRM2    | -0.757 | 11.802 | -4.724 | 4.11E-06 | 3.07E-05 | 3.901 | NoSig |
| MKL1     | -0.405 | 8.552  | -4.718 | 4.22E-06 | 3.14E-05 | 3.876 | NoSig |
| AFG3L2   | -0.487 | 10.050 | -4.715 | 4.28E-06 | 3.17E-05 | 3.864 | NoSig |
| FGF1     | -0.442 | 7.729  | -4.707 | 4.43E-06 | 3.26E-05 | 3.832 | NoSig |
| HS3ST3B1 | -0.774 | 6.818  | -4.699 | 4.60E-06 | 3.37E-05 | 3.796 | NoSig |
| DIP2A    | -0.670 | 9.013  | -4.685 | 4.89E-06 | 3.56E-05 | 3.738 | NoSig |
| ARPC5    | -0.323 | 12.204 | -4.676 | 5.08E-06 | 3.68E-05 | 3.702 | NoSig |
| SH2D3C   | -0.444 | 7.402  | -4.671 | 5.20E-06 | 3.75E-05 | 3.680 | NoSig |
| JMJD6    | 0.968  | 8.772  | 4.645  | 5.82E-06 | 4.18E-05 | 3.574 | NoSig |
| CCRN4L   | -0.403 | 8.601  | -4.636 | 6.07E-06 | 4.31E-05 | 3.534 | NoSig |
| CLSPN    | -0.873 | 5.779  | -4.635 | 6.08E-06 | 4.31E-05 | 3.532 | NoSig |
| SOX4     | 0.822  | 11.581 | 4.631  | 6.20E-06 | 4.35E-05 | 3.515 | NoSig |
| ORAI2    | -0.489 | 8.145  | -4.628 | 6.28E-06 | 4.39E-05 | 3.501 | NoSig |
| TFB2M    | 0.761  | 9.245  | 4.615  | 6.66E-06 | 4.63E-05 | 3.447 | NoSig |
| MEF2BNB  | -0.864 | 7.261  | -4.614 | 6.70E-06 | 4.63E-05 | 3.441 | NoSig |
| NEK11    | -0.369 | 8.792  | -4.601 | 7.07E-06 | 4.87E-05 | 3.390 | NoSig |
| PNN      | -0.392 | 12.626 | -4.588 | 7.48E-06 | 5.10E-05 | 3.337 | NoSig |
| STX16    | -0.460 | 10.554 | -4.579 | 7.78E-06 | 5.28E-05 | 3.301 | NoSig |
| MBTPS2   | -0.556 | 7.666  | -4.570 | 8.12E-06 | 5.49E-05 | 3.260 | NoSig |
| WARS2    | 0.712  | 7.784  | 4.567  | 8.21E-06 | 5.53E-05 | 3.249 | NoSig |
| TIA1     | -0.464 | 10.520 | -4.564 | 8.34E-06 | 5.58E-05 | 3.235 | NoSig |
| ZSCAN5A  | 0.710  | 7.015  | 4.563  | 8.36E-06 | 5.58E-05 | 3.232 | NoSig |
| MYNN     | 0.368  | 8.079  | 4.557  | 8.57E-06 | 5.69E-05 | 3.209 | NoSig |
| CRTAP    | -0.627 | 8.993  | -4.551 | 8.80E-06 | 5.82E-05 | 3.184 | NoSig |
| LAPTM4B  | 0.778  | 12.664 | 4.533  | 9.51E-06 | 6.25E-05 | 3.111 | NoSig |
| SKIV2L2  | 0.446  | 9.190  | 4.532  | 9.54E-06 | 6.25E-05 | 3.108 | NoSig |
| SART3    | 0.584  | 9.074  | 4.528  | 9.71E-06 | 6.33E-05 | 3.092 | NoSig |
| ATP5SL   | 0.346  | 9.434  | 4.526  | 9.81E-06 | 6.37E-05 | 3.082 | NoSig |
| SF3B2    | 0.779  | 9.533  | 4.517  | 1.02E-05 | 6.60E-05 | 3.044 | NoSig |
| SMARCC2  | 0.662  | 8.467  | 4.503  | 1.08E-05 | 6.98E-05 | 2.988 | NoSig |
| CYB5R3   | 0.500  | 11.545 | 4.501  | 1.09E-05 | 7.00E-05 | 2.981 | NoSig |
| SLC38A4  | -0.871 | 4.849  | -4.496 | 1.12E-05 | 7.14E-05 | 2.959 | NoSig |
| SNX13    | 0.361  | 8.906  | 4.492  | 1.13E-05 | 7.21E-05 | 2.945 | NoSig |
| ASCC1    | -0.574 | 8.839  | -4.472 | 1.24E-05 | 7.79E-05 | 2.864 | NoSig |
| TM2D1    | 0.424  | 9.068  | 4.467  | 1.27E-05 | 7.93E-05 | 2.842 | NoSig |
| BRF1     | -0.789 | 6.602  | -4.466 | 1.27E-05 | 7.93E-05 | 2.840 | NoSig |

|          |        |        |        |          |             |       |       |
|----------|--------|--------|--------|----------|-------------|-------|-------|
| PGK1     | 0.757  | 12.543 | 4.465  | 1.28E-05 | 7.94E-05    | 2.835 | NoSig |
| CDKL1    | -0.947 | 4.133  | -4.447 | 1.38E-05 | 8.53E-05    | 2.764 | NoSig |
| MAGI1    | -0.508 | 8.302  | -4.444 | 1.40E-05 | 8.61E-05    | 2.751 | NoSig |
| NOC2L    | 0.576  | 8.692  | 4.440  | 1.42E-05 | 8.71E-05    | 2.736 | NoSig |
| HUNK     | -0.605 | 7.055  | -4.439 | 1.43E-05 | 8.72E-05    | 2.731 | NoSig |
| KIAA1107 | -0.491 | 6.869  | -4.432 | 1.47E-05 | 8.94E-05    | 2.704 | NoSig |
| SRPK2    | -0.494 | 9.918  | -4.425 | 1.51E-05 | 9.16E-05    | 2.674 | NoSig |
| KDELRL1  | -0.832 | 9.517  | -4.425 | 1.51E-05 | 9.16E-05    | 2.674 | NoSig |
| TMEM135  | 0.734  | 7.445  | 4.416  | 1.57E-05 | 9.42E-05    | 2.639 | NoSig |
| ATP11B   | -0.802 | 8.786  | -4.414 | 1.59E-05 | 9.47E-05    | 2.631 | NoSig |
| GATM     | 0.950  | 7.522  | 4.413  | 1.59E-05 | 9.47E-05    | 2.626 | NoSig |
| GOLM1    | 0.901  | 8.419  | 4.410  | 1.62E-05 | 9.57E-05    | 2.613 | NoSig |
| PAK6     | -0.602 | 7.752  | -4.401 | 1.68E-05 | 9.91E-05    | 2.577 | NoSig |
| JRK      | -0.415 | 9.076  | -4.392 | 1.74E-05 | 0.000102352 | 2.543 | NoSig |
| ATP5S    | -0.356 | 8.314  | -4.379 | 1.84E-05 | 0.000106842 | 2.492 | NoSig |
| SNX19    | -0.806 | 7.954  | -4.379 | 1.84E-05 | 0.000106842 | 2.491 | NoSig |
| YEATS2   | 0.395  | 9.097  | 4.375  | 1.87E-05 | 0.000108356 | 2.474 | NoSig |
| MAP3K11  | 0.735  | 9.313  | 4.363  | 1.96E-05 | 0.000113236 | 2.429 | NoSig |
| METTL17  | 0.933  | 9.303  | 4.358  | 2.01E-05 | 0.000115015 | 2.410 | NoSig |
| CAND1    | 0.614  | 8.954  | 4.355  | 2.03E-05 | 0.000115833 | 2.397 | NoSig |
| TRIM44   | 0.531  | 9.773  | 4.353  | 2.05E-05 | 0.000116455 | 2.389 | NoSig |
| EYA3     | -0.984 | 5.810  | -4.334 | 2.22E-05 | 0.000125172 | 2.314 | NoSig |
| AGFG2    | -0.554 | 7.627  | -4.324 | 2.32E-05 | 0.000129707 | 2.275 | NoSig |
| PDGFRA   | 0.962  | 7.500  | 4.324  | 2.32E-05 | 0.000129707 | 2.274 | NoSig |
| CNNM2    | -0.477 | 8.512  | -4.319 | 2.37E-05 | 0.000131765 | 2.255 | NoSig |
| PRMT1    | 0.910  | 10.657 | 4.317  | 2.39E-05 | 0.000131898 | 2.247 | NoSig |
| VPS53    | -0.478 | 7.370  | -4.317 | 2.39E-05 | 0.000131898 | 2.246 | NoSig |
| ERC1     | -0.328 | 9.071  | -4.309 | 2.47E-05 | 0.000135227 | 2.214 | NoSig |
| SCN8A    | -0.699 | 3.811  | -4.308 | 2.47E-05 | 0.000135227 | 2.214 | NoSig |
| TXNDC9   | 0.357  | 10.426 | 4.280  | 2.79E-05 | 0.000151745 | 2.102 | NoSig |
| FAM184A  | -0.520 | 8.099  | -4.278 | 2.81E-05 | 0.000152545 | 2.094 | NoSig |
| TEX10    | -0.298 | 9.679  | -4.272 | 2.88E-05 | 0.000155554 | 2.072 | NoSig |
| GPNMB    | 0.853  | 11.785 | 4.268  | 2.93E-05 | 0.000157863 | 2.055 | NoSig |
| POFUT2   | 0.664  | 8.334  | 4.266  | 2.95E-05 | 0.000158521 | 2.048 | NoSig |
| HSD17B12 | 0.688  | 11.148 | 4.263  | 2.98E-05 | 0.000159455 | 2.039 | NoSig |
| TRIB3    | 0.672  | 9.403  | 4.252  | 3.12E-05 | 0.000166293 | 1.996 | NoSig |
| BRD3     | 0.646  | 9.762  | 4.250  | 3.15E-05 | 0.00016752  | 1.986 | NoSig |
| KAT6A    | 0.533  | 10.214 | 4.243  | 3.25E-05 | 0.000171321 | 1.958 | NoSig |
| TIMM17B  | 0.974  | 8.876  | 4.240  | 3.28E-05 | 0.000172565 | 1.948 | NoSig |
| ATN1     | -0.376 | 9.000  | -4.234 | 3.37E-05 | 0.000176191 | 1.925 | NoSig |
| NLRX1    | 0.651  | 8.017  | 4.224  | 3.51E-05 | 0.000182543 | 1.886 | NoSig |
| GON4L    | -0.347 | 9.800  | -4.222 | 3.53E-05 | 0.00018292  | 1.880 | NoSig |
| FGFR1OP  | -0.604 | 8.930  | -4.219 | 3.59E-05 | 0.000185178 | 1.866 | NoSig |
| TMEM126B | 0.539  | 10.355 | 4.216  | 3.63E-05 | 0.000186823 | 1.854 | NoSig |
| IKZF1    | -0.474 | 9.216  | -4.206 | 3.77E-05 | 0.000192749 | 1.818 | NoSig |

|          |        |        |        |             |             |       |       |
|----------|--------|--------|--------|-------------|-------------|-------|-------|
| CARD8    | -0.501 | 8.544  | -4.205 | 3.78E-05    | 0.000192749 | 1.815 | NoSig |
| ADAM21   | -0.574 | 7.885  | -4.195 | 3.94E-05    | 0.000199508 | 1.777 | NoSig |
| FAM69A   | -0.520 | 8.744  | -4.192 | 3.99E-05    | 0.000200807 | 1.765 | NoSig |
| MTHFSD   | -0.643 | 7.819  | -4.192 | 4.00E-05    | 0.000200807 | 1.764 | NoSig |
| PMP22    | 0.812  | 9.962  | 4.182  | 4.16E-05    | 0.000208215 | 1.727 | NoSig |
| GHITM    | -0.374 | 11.738 | -4.163 | 4.51E-05    | 0.000224954 | 1.652 | NoSig |
| ZNF586   | -0.412 | 8.424  | -4.161 | 4.53E-05    | 0.000225297 | 1.647 | NoSig |
| IDH1     | -0.475 | 10.959 | -4.155 | 4.64E-05    | 0.000229938 | 1.625 | NoSig |
| CALCOCO2 | 0.480  | 9.676  | 4.147  | 4.80E-05    | 0.000236952 | 1.594 | NoSig |
| TCEA1    | 0.684  | 11.442 | 4.143  | 4.88E-05    | 0.000240455 | 1.577 | NoSig |
| TXNL4A   | 0.542  | 11.289 | 4.141  | 4.92E-05    | 0.000240972 | 1.571 | NoSig |
| LMNA     | 0.484  | 11.225 | 4.141  | 4.93E-05    | 0.000240972 | 1.569 | NoSig |
| NEK4     | 0.503  | 7.637  | 4.138  | 4.97E-05    | 0.000242548 | 1.560 | NoSig |
| C2CD3    | 0.353  | 8.486  | 4.137  | 5.00E-05    | 0.000243139 | 1.554 | NoSig |
| PMS1     | 0.411  | 9.328  | 4.132  | 5.11E-05    | 0.000247311 | 1.536 | NoSig |
| HS1BP3   | 0.558  | 9.032  | 4.127  | 5.20E-05    | 0.000251038 | 1.519 | NoSig |
| GPD1     | -0.771 | 5.628  | -4.120 | 5.36E-05    | 0.000258156 | 1.489 | NoSig |
| SLC18A2  | -0.917 | 4.643  | -4.099 | 5.82E-05    | 0.000277405 | 1.413 | NoSig |
| ANKMY1   | -0.780 | 5.442  | -4.096 | 5.89E-05    | 0.000279885 | 1.402 | NoSig |
| HPRT1    | 0.852  | 10.226 | 4.095  | 5.93E-05    | 0.000280766 | 1.396 | NoSig |
| MKL2     | 0.298  | 9.387  | 4.087  | 6.12E-05    | 0.000288717 | 1.367 | NoSig |
| GTF2H5   | 0.501  | 9.767  | 4.083  | 6.21E-05    | 0.00029209  | 1.353 | NoSig |
| HIVEP1   | 0.375  | 7.577  | 4.080  | 6.29E-05    | 0.000294136 | 1.341 | NoSig |
| KLF7     | -0.457 | 9.514  | -4.078 | 6.35E-05    | 0.000295871 | 1.332 | NoSig |
| HIP1     | 0.451  | 7.696  | 4.068  | 6.60E-05    | 0.000306736 | 1.296 | NoSig |
| YTHDC2   | -0.620 | 8.284  | -4.059 | 6.83E-05    | 0.000316328 | 1.264 | NoSig |
| CYB5R1   | 0.649  | 9.843  | 4.056  | 6.91E-05    | 0.000319179 | 1.253 | NoSig |
| PGD      | 0.952  | 9.173  | 4.055  | 6.93E-05    | 0.000319179 | 1.250 | NoSig |
| CLCC1    | -0.609 | 9.307  | -4.049 | 7.12E-05    | 0.000326573 | 1.226 | NoSig |
| PLCG2    | 0.730  | 9.207  | 4.037  | 7.45E-05    | 0.000339963 | 1.183 | NoSig |
| SCARB1   | 0.511  | 9.457  | 4.032  | 7.62E-05    | 0.000346299 | 1.163 | NoSig |
| CCDC90B  | 0.321  | 9.591  | 4.019  | 8.01E-05    | 0.000362395 | 1.115 | NoSig |
| OSBP     | 0.336  | 9.396  | 4.019  | 8.02E-05    | 0.000362395 | 1.115 | NoSig |
| RGS12    | -0.339 | 8.074  | -4.017 | 8.07E-05    | 0.000363607 | 1.109 | NoSig |
| RBM25    | -0.431 | 9.991  | -4.014 | 8.18E-05    | 0.000367639 | 1.096 | NoSig |
| CNP      | 0.414  | 10.320 | 4.003  | 8.53E-05    | 0.000382135 | 1.057 | NoSig |
| NOS1AP   | -0.493 | 4.902  | -4.001 | 8.59E-05    | 0.000383409 | 1.051 | NoSig |
| ARHGEF2  | 0.623  | 10.397 | 3.999  | 8.68E-05    | 0.000386537 | 1.041 | NoSig |
| INSL3    | -0.455 | 7.190  | -3.987 | 9.08E-05    | 0.000402957 | 0.999 | NoSig |
| PIAS2    | -0.424 | 8.872  | -3.985 | 9.17E-05    | 0.000405953 | 0.989 | NoSig |
| SCN1A    | -0.899 | 4.164  | -3.980 | 9.34E-05    | 0.000412141 | 0.973 | NoSig |
| ATF2     | 0.535  | 7.708  | 3.974  | 9.58E-05    | 0.000421471 | 0.949 | NoSig |
| RAD51B   | -0.467 | 6.620  | -3.967 | 9.83E-05    | 0.000429872 | 0.925 | NoSig |
| AMN      | -0.624 | 7.711  | -3.959 | 0.000101317 | 0.000441812 | 0.897 | NoSig |
| PIGG     | 0.357  | 9.342  | 3.957  | 0.000102231 | 0.000444495 | 0.889 | NoSig |



|          |        |        |        |             |             |       |       |
|----------|--------|--------|--------|-------------|-------------|-------|-------|
| CAMKMT   | -0.646 | 6.859  | -3.952 | 0.000104272 | 0.000450735 | 0.870 | NoSig |
| PAPOLG   | 0.510  | 7.120  | 3.946  | 0.000106672 | 0.000459774 | 0.849 | NoSig |
| DNAJA3   | -0.251 | 10.468 | -3.937 | 0.000110621 | 0.000475415 | 0.815 | NoSig |
| GGA1     | 0.716  | 11.256 | 3.933  | 0.000112102 | 0.000480227 | 0.803 | NoSig |
| PRKD3    | 0.514  | 8.720  | 3.928  | 0.000114276 | 0.000486899 | 0.785 | NoSig |
| RASGRF1  | -0.476 | 7.574  | -3.926 | 0.00011546  | 0.000490539 | 0.775 | NoSig |
| TIMM10   | -0.584 | 9.992  | -3.920 | 0.000118182 | 0.000500676 | 0.754 | NoSig |
| TGOLN2   | 0.328  | 10.626 | 3.916  | 0.000120013 | 0.000506989 | 0.739 | NoSig |
| SLC26A1  | 0.713  | 7.031  | 3.907  | 0.00012426  | 0.000523443 | 0.707 | NoSig |
| WAPAL    | -0.529 | 9.068  | -3.904 | 0.000125501 | 0.000527175 | 0.698 | NoSig |
| NFX1     | -0.358 | 9.280  | -3.903 | 0.000126189 | 0.000528572 | 0.693 | NoSig |
| HSP90AB1 | -0.502 | 13.983 | -3.896 | 0.00012952  | 0.000538346 | 0.669 | NoSig |
| PHKG2    | 0.551  | 8.320  | 3.896  | 0.000129574 | 0.000538346 | 0.668 | NoSig |
| C19orf26 | -0.833 | 2.981  | -3.895 | 0.000129847 | 0.000538346 | 0.666 | NoSig |
| NKTR     | 0.383  | 10.307 | 3.895  | 0.000129971 | 0.000538346 | 0.665 | NoSig |
| GSN      | 0.528  | 10.685 | 3.892  | 0.00013171  | 0.000544036 | 0.653 | NoSig |
| RNASET2  | 0.772  | 11.060 | 3.890  | 0.000132592 | 0.00054616  | 0.647 | NoSig |
| ATAD2B   | -0.563 | 8.364  | -3.877 | 0.000139239 | 0.000569792 | 0.601 | NoSig |
| KLK8     | 0.827  | 8.550  | 3.877  | 0.000139478 | 0.000569792 | 0.600 | NoSig |
| NEDD9    | 0.513  | 8.120  | 3.874  | 0.000141169 | 0.000575121 | 0.589 | NoSig |
| MCOLN3   | -0.902 | 5.738  | -3.871 | 0.000142569 | 0.000579233 | 0.580 | NoSig |
| MYO10    | 0.609  | 9.884  | 3.867  | 0.000144663 | 0.000586142 | 0.566 | NoSig |
| ACPI     | 0.437  | 10.630 | 3.867  | 0.000145091 | 0.000586279 | 0.563 | NoSig |
| SCARF1   | -0.720 | 6.285  | -3.865 | 0.000145928 | 0.000587767 | 0.558 | NoSig |
| IRAK3    | -0.960 | 5.594  | -3.865 | 0.00014625  | 0.000587767 | 0.556 | NoSig |
| ARHGAP19 | 0.724  | 6.238  | 3.862  | 0.000147439 | 0.000590948 | 0.548 | NoSig |
| FBXO42   | 0.418  | 8.123  | 3.862  | 0.000147858 | 0.000591036 | 0.546 | NoSig |
| VPS37C   | -0.542 | 9.725  | -3.854 | 0.000152438 | 0.000606084 | 0.517 | NoSig |
| USP25    | -0.260 | 10.027 | -3.849 | 0.000154916 | 0.000614293 | 0.503 | NoSig |
| ARIH1    | 0.396  | 9.317  | 3.827  | 0.000168869 | 0.000667841 | 0.423 | NoSig |
| DCAF13   | 0.649  | 6.580  | 3.820  | 0.000173114 | 0.000682813 | 0.400 | NoSig |
| SLC4A8   | -0.893 | 4.666  | -3.809 | 0.000180428 | 0.00070978  | 0.361 | NoSig |
| PCNXL2   | -0.469 | 8.235  | -3.807 | 0.000181808 | 0.000713322 | 0.354 | NoSig |
| PDZD3    | -0.467 | 5.401  | -3.802 | 0.000185551 | 0.00072609  | 0.335 | NoSig |
| BICD1    | -0.573 | 7.895  | -3.792 | 0.000192494 | 0.000751281 | 0.301 | NoSig |
| NAP1L4   | -0.291 | 10.005 | -3.792 | 0.000193081 | 0.000751601 | 0.298 | NoSig |
| DYNLRB1  | 0.596  | 11.419 | 3.788  | 0.000195914 | 0.000760636 | 0.285 | NoSig |
| STRAP    | 0.475  | 11.745 | 3.779  | 0.000202606 | 0.000782532 | 0.254 | NoSig |
| DDX6     | -0.508 | 7.911  | -3.764 | 0.00021404  | 0.000824552 | 0.203 | NoSig |
| SLC8A1   | -0.857 | 6.958  | -3.762 | 0.000215472 | 0.000827923 | 0.197 | NoSig |
| FBXL18   | -0.322 | 7.816  | -3.760 | 0.00021722  | 0.000832488 | 0.189 | NoSig |
| OSBPL1A  | 0.398  | 9.489  | 3.759  | 0.000218165 | 0.000833828 | 0.185 | NoSig |
| NFE2L2   | 0.374  | 10.217 | 3.759  | 0.000218691 | 0.000833828 | 0.183 | NoSig |
| THADA    | -0.324 | 9.102  | -3.758 | 0.00021927  | 0.000833899 | 0.181 | NoSig |
| TSPAN3   | 0.506  | 10.262 | 3.748  | 0.000227661 | 0.0008636   | 0.146 | NoSig |

|           |        |        |        |             |             |        |       |
|-----------|--------|--------|--------|-------------|-------------|--------|-------|
| CRISPLD2  | 0.557  | 9.025  | 3.745  | 0.000230079 | 0.000870555 | 0.136  | NoSig |
| P2RY10    | -0.753 | 6.097  | -3.740 | 0.000234261 | 0.000882795 | 0.119  | NoSig |
| DGKE      | -0.671 | 6.214  | -3.740 | 0.000234502 | 0.000882795 | 0.119  | NoSig |
| SETD6     | -0.836 | 8.160  | -3.734 | 0.000240164 | 0.000901828 | 0.096  | NoSig |
| UBA1      | 0.677  | 11.492 | 3.733  | 0.000241001 | 0.000902692 | 0.093  | NoSig |
| ETS1      | -0.833 | 7.394  | -3.731 | 0.000242841 | 0.000907296 | 0.086  | NoSig |
| ANGPT1    | 0.644  | 8.391  | 3.727  | 0.000246221 | 0.000917619 | 0.073  | NoSig |
| DNM3      | -0.390 | 7.634  | -3.721 | 0.000251267 | 0.000934084 | 0.055  | NoSig |
| RNF32     | -0.858 | 5.178  | -3.718 | 0.000254553 | 0.000943939 | 0.043  | NoSig |
| QTRTD1    | 0.565  | 7.253  | 3.716  | 0.000256205 | 0.000947705 | 0.037  | NoSig |
| UBTF      | -0.535 | 8.257  | -3.715 | 0.000257216 | 0.000949084 | 0.033  | NoSig |
| BAP1      | 0.449  | 8.868  | 3.713  | 0.000259052 | 0.000953492 | 0.026  | NoSig |
| NOX5      | -0.540 | 6.957  | -3.706 | 0.000266031 | 0.000976485 | 0.002  | NoSig |
| KCNIP2    | -0.581 | 6.733  | -3.705 | 0.000266613 | 0.000976485 | 0.000  | NoSig |
| PAPPA     | -0.533 | 6.645  | -3.703 | 0.00026938  | 0.000984197 | -0.010 | NoSig |
| SSBP1     | 0.562  | 10.950 | 3.697  | 0.000275155 | 0.001002834 | -0.029 | NoSig |
| SREK1IP1  | -0.912 | 7.170  | -3.696 | 0.000276224 | 0.001004266 | -0.033 | NoSig |
| TP63      | 0.739  | 7.878  | 3.691  | 0.000281679 | 0.001021602 | -0.051 | NoSig |
| ASMTL.AS1 | -0.857 | 3.415  | -3.685 | 0.000287243 | 0.001039247 | -0.069 | NoSig |
| BCL2L13   | 0.319  | 8.867  | 3.675  | 0.000298516 | 0.001077409 | -0.104 | NoSig |
| ACAT1     | 0.442  | 10.235 | 3.671  | 0.000302537 | 0.001089278 | -0.117 | NoSig |
| IBA57     | -0.745 | 6.114  | -3.667 | 0.000306969 | 0.001102567 | -0.130 | NoSig |
| LRPPRC    | 0.409  | 10.936 | 3.662  | 0.000313309 | 0.001122626 | -0.149 | NoSig |
| ABHD11    | 0.514  | 9.800  | 3.660  | 0.000315577 | 0.001128035 | -0.156 | NoSig |
| CMAHP     | 0.503  | 7.783  | 3.659  | 0.000316348 | 0.001128082 | -0.158 | NoSig |
| SHB       | -0.425 | 8.800  | -3.658 | 0.000317736 | 0.001130321 | -0.162 | NoSig |
| ARHGEF12  | 0.455  | 9.302  | 3.644  | 0.000334969 | 0.001188781 | -0.211 | NoSig |
| PDZRN3    | 0.770  | 7.026  | 3.639  | 0.000341268 | 0.001208251 | -0.228 | NoSig |
| RABGAP1L  | 0.519  | 9.235  | 3.635  | 0.000345318 | 0.001219687 | -0.239 | NoSig |
| CAST      | 0.334  | 10.182 | 3.630  | 0.000352308 | 0.001241427 | -0.257 | NoSig |
| PPIP5K1   | -0.639 | 6.359  | -3.626 | 0.000357311 | 0.001255495 | -0.270 | NoSig |
| CYTH2     | -0.437 | 8.864  | -3.625 | 0.000357989 | 0.001255495 | -0.272 | NoSig |
| EXD2      | -0.312 | 9.021  | -3.617 | 0.00036969  | 0.00129348  | -0.302 | NoSig |
| CCDC57    | -0.749 | 5.618  | -3.606 | 0.00038485  | 0.001343362 | -0.339 | NoSig |
| PTPRE     | 0.523  | 8.657  | 3.603  | 0.000388081 | 0.001351468 | -0.346 | NoSig |
| C5orf22   | -0.403 | 9.424  | -3.589 | 0.000408837 | 0.001419658 | -0.394 | NoSig |
| CCNL1     | -0.452 | 10.494 | -3.588 | 0.000409572 | 0.001419658 | -0.396 | NoSig |
| NDUFA7    | 0.775  | 8.522  | 3.579  | 0.000423335 | 0.001463953 | -0.426 | NoSig |
| TBL3      | 0.605  | 7.545  | 3.571  | 0.00043547  | 0.001502423 | -0.452 | NoSig |
| DNAJC7    | -0.344 | 9.482  | -3.565 | 0.0004464   | 0.001536565 | -0.475 | NoSig |
| NAP1L1    | 0.398  | 11.783 | 3.553  | 0.000465877 | 0.001599906 | -0.515 | NoSig |
| DYNC2H1   | -0.352 | 7.607  | -3.535 | 0.000495774 | 0.001698655 | -0.572 | NoSig |
| HGSNAT    | 0.451  | 9.210  | 3.530  | 0.00050608  | 0.00172998  | -0.591 | NoSig |
| BCL2L11   | -0.644 | 7.235  | -3.526 | 0.000512252 | 0.001747063 | -0.602 | NoSig |
| SLC9A7    | -0.920 | 5.551  | -3.522 | 0.000519572 | 0.00176797  | -0.615 | NoSig |

|          |        |        |        |             |             |        |       |
|----------|--------|--------|--------|-------------|-------------|--------|-------|
| MAK      | -0.728 | 5.240  | -3.519 | 0.000525754 | 0.001784924 | -0.626 | NoSig |
| MEG3     | 0.634  | 6.761  | 3.511  | 0.000540032 | 0.001829221 | -0.650 | NoSig |
| SNAPC5   | -0.399 | 9.494  | -3.507 | 0.000548894 | 0.001855012 | -0.665 | NoSig |
| DPY19L4  | 0.338  | 8.733  | 3.494  | 0.000575473 | 0.001940428 | -0.709 | NoSig |
| ARHGAP25 | 0.629  | 8.768  | 3.486  | 0.000590831 | 0.001987705 | -0.733 | NoSig |
| ERBB3    | 0.492  | 9.885  | 3.483  | 0.000597288 | 0.002000274 | -0.743 | NoSig |
| NBR2     | -0.918 | 5.279  | -3.483 | 0.000597505 | 0.002000274 | -0.743 | NoSig |
| SLC16A1  | -0.442 | 9.232  | -3.482 | 0.000598602 | 0.002000274 | -0.745 | NoSig |
| COPA     | 0.758  | 11.245 | 3.476  | 0.000612933 | 0.002043567 | -0.766 | NoSig |
| SUOX     | -0.452 | 8.597  | -3.475 | 0.000614521 | 0.002044278 | -0.769 | NoSig |
| PDE8B    | -0.381 | 8.038  | -3.474 | 0.000617238 | 0.002048736 | -0.773 | NoSig |
| SRC      | -0.532 | 6.086  | -3.471 | 0.000623662 | 0.002065446 | -0.782 | NoSig |
| HEATR6   | -0.393 | 7.513  | -3.467 | 0.000632063 | 0.002088618 | -0.795 | NoSig |
| CNDP2    | 0.527  | 10.634 | 3.462  | 0.000643255 | 0.002120887 | -0.811 | NoSig |
| TSPYL1   | 0.375  | 9.632  | 3.453  | 0.000663352 | 0.00218231  | -0.839 | NoSig |
| POLH     | -0.858 | 6.460  | -3.451 | 0.000668726 | 0.002195135 | -0.846 | NoSig |
| DOCK4    | -0.456 | 8.048  | -3.444 | 0.000684838 | 0.00224307  | -0.868 | NoSig |
| XCR1     | -0.537 | 5.212  | -3.444 | 0.000686411 | 0.002243283 | -0.870 | NoSig |
| JPH2     | -0.687 | 3.717  | -3.441 | 0.000691546 | 0.002255106 | -0.877 | NoSig |
| RFX4     | -0.658 | 3.620  | -3.439 | 0.000696863 | 0.002267474 | -0.884 | NoSig |
| ABCC5    | 0.459  | 9.622  | 3.438  | 0.000698842 | 0.002268949 | -0.887 | NoSig |
| TTLL4    | -0.300 | 8.508  | -3.435 | 0.000706884 | 0.002288239 | -0.897 | NoSig |
| DGKH     | -0.488 | 7.790  | -3.435 | 0.000707861 | 0.002288239 | -0.898 | NoSig |
| PIK3C2A  | -0.614 | 9.118  | -3.413 | 0.00076379  | 0.002463679 | -0.968 | NoSig |
| HSDL2    | 0.537  | 7.891  | 3.410  | 0.00077076  | 0.002480779 | -0.976 | NoSig |
| SYNE2    | -0.440 | 9.383  | -3.407 | 0.00078023  | 0.002505837 | -0.988 | NoSig |
| TOR1AIP1 | 0.503  | 9.710  | 3.406  | 0.000783604 | 0.002511247 | -0.992 | NoSig |
| PIGK     | 0.344  | 8.236  | 3.404  | 0.000788999 | 0.0025231   | -0.998 | NoSig |
| CEP68    | -0.261 | 8.855  | -3.402 | 0.000794162 | 0.00253416  | -1.004 | NoSig |
| CLIP1    | -0.659 | 8.877  | -3.396 | 0.00081091  | 0.002581786 | -1.023 | NoSig |
| ZBTB24   | -0.434 | 8.855  | -3.395 | 0.000812559 | 0.002581786 | -1.025 | NoSig |
| PQLC2    | -0.385 | 7.842  | -3.389 | 0.000829809 | 0.002628313 | -1.044 | NoSig |
| TLL1     | -0.535 | 5.565  | -3.389 | 0.000830738 | 0.002628313 | -1.045 | NoSig |
| DNAH6    | -0.339 | 6.005  | -3.368 | 0.000891651 | 0.002815041 | -1.110 | NoSig |
| NAA16    | -0.336 | 8.284  | -3.366 | 0.00089982  | 0.002831132 | -1.118 | NoSig |
| DNAJC11  | -0.208 | 9.400  | -3.365 | 0.000900913 | 0.002831132 | -1.119 | NoSig |
| RNF103   | 0.386  | 9.720  | 3.365  | 0.000902459 | 0.002831132 | -1.121 | NoSig |
| SCPEP1   | 0.370  | 10.111 | 3.364  | 0.000906113 | 0.002836611 | -1.124 | NoSig |
| IRAK1    | 0.625  | 11.583 | 3.358  | 0.000923701 | 0.002885596 | -1.142 | NoSig |
| MOXD1    | -0.408 | 8.318  | -3.356 | 0.000931233 | 0.002903028 | -1.149 | NoSig |
| PRKAB2   | -0.286 | 8.663  | -3.354 | 0.000937235 | 0.002915624 | -1.155 | NoSig |
| SPEN     | -0.222 | 9.826  | -3.345 | 0.000966604 | 0.002995813 | -1.183 | NoSig |
| DSE      | 0.525  | 8.696  | 3.344  | 0.000969056 | 0.002995813 | -1.186 | NoSig |
| TRIM52   | -0.543 | 7.850  | -3.343 | 0.000971482 | 0.002997082 | -1.188 | NoSig |
| CYP2U1   | -0.664 | 4.088  | -3.340 | 0.000983777 | 0.003028728 | -1.199 | NoSig |

|           |        |        |        |             |             |        |       |
|-----------|--------|--------|--------|-------------|-------------|--------|-------|
| NOS1      | 0.805  | 7.840  | 3.336  | 0.000997186 | 0.003063287 | -1.212 | NoSig |
| NCOA6     | 0.262  | 9.806  | 3.335  | 0.001000466 | 0.003063287 | -1.215 | NoSig |
| FBXO28    | -0.286 | 9.686  | -3.335 | 0.001001182 | 0.003063287 | -1.215 | NoSig |
| PCCB      | 0.518  | 9.341  | 3.331  | 0.001013272 | 0.003093913 | -1.226 | NoSig |
| CDK8      | -0.422 | 7.903  | -3.326 | 0.001032894 | 0.003147362 | -1.244 | NoSig |
| MAP4K4    | -0.338 | 8.724  | -3.319 | 0.001055089 | 0.00320842  | -1.263 | NoSig |
| TMBIM4    | 0.325  | 9.832  | 3.314  | 0.00107507  | 0.003260781 | -1.280 | NoSig |
| PTK7      | 0.520  | 8.727  | 3.313  | 0.001076694 | 0.003260781 | -1.282 | NoSig |
| MAST4     | 0.496  | 7.991  | 3.291  | 0.001161716 | 0.00351112  | -1.351 | NoSig |
| GABRG2    | 0.651  | 6.346  | 3.288  | 0.00117192  | 0.003527621 | -1.359 | NoSig |
| TAF5L     | -0.354 | 9.470  | -3.286 | 0.001180656 | 0.003546737 | -1.366 | NoSig |
| CNOT7     | 0.379  | 10.799 | 3.283  | 0.001195242 | 0.003583315 | -1.377 | NoSig |
| FCRL2     | -0.547 | 7.053  | -3.278 | 0.001213815 | 0.003631677 | -1.391 | NoSig |
| CFL1      | 0.620  | 14.723 | 3.276  | 0.001220129 | 0.003643236 | -1.396 | NoSig |
| MLXIP     | 0.351  | 9.269  | 3.275  | 0.001224398 | 0.003648657 | -1.399 | NoSig |
| DGKB      | -0.732 | 4.019  | -3.274 | 0.001229043 | 0.003655174 | -1.402 | NoSig |
| HPS4      | -0.560 | 7.574  | -3.272 | 0.0012408   | 0.003682773 | -1.411 | NoSig |
| ZNF264    | 0.475  | 8.534  | 3.270  | 0.001247378 | 0.003694923 | -1.416 | NoSig |
| ZMYM6     | -0.468 | 8.281  | -3.267 | 0.001260762 | 0.003727144 | -1.426 | NoSig |
| ZNF107    | -0.616 | 7.911  | -3.260 | 0.001291602 | 0.003810737 | -1.448 | NoSig |
| TAGLN     | 0.871  | 10.038 | 3.256  | 0.00130657  | 0.003847268 | -1.458 | NoSig |
| SYMPK     | -0.727 | 6.952  | -3.255 | 0.001311058 | 0.003852851 | -1.461 | NoSig |
| ST18      | -0.764 | 3.639  | -3.244 | 0.00136098  | 0.003991672 | -1.495 | NoSig |
| UCHL1     | 0.827  | 9.462  | 3.241  | 0.001372687 | 0.004018082 | -1.503 | NoSig |
| P4HB      | 0.363  | 12.989 | 3.237  | 0.001393526 | 0.004071067 | -1.517 | NoSig |
| WTAP      | 0.432  | 9.696  | 3.234  | 0.00140589  | 0.004099134 | -1.525 | NoSig |
| OSGIN2    | -0.400 | 8.097  | -3.231 | 0.001422868 | 0.004140517 | -1.536 | NoSig |
| WDR78     | -0.299 | 7.298  | -3.230 | 0.001425804 | 0.004140959 | -1.537 | NoSig |
| SRGN      | 0.709  | 11.284 | 3.229  | 0.001431427 | 0.004149186 | -1.541 | NoSig |
| WDR37     | 0.295  | 8.989  | 3.224  | 0.001452773 | 0.004202865 | -1.554 | NoSig |
| CYP2E1    | -0.548 | 6.311  | -3.217 | 0.001490229 | 0.004302857 | -1.578 | NoSig |
| HFE       | -0.361 | 8.725  | -3.204 | 0.001554108 | 0.004478602 | -1.616 | NoSig |
| ENTPD5    | -0.404 | 7.713  | -3.195 | 0.001602571 | 0.004609328 | -1.644 | NoSig |
| UBE3C     | -0.286 | 9.545  | -3.192 | 0.001619331 | 0.004648543 | -1.653 | NoSig |
| PSEN1     | -0.254 | 9.433  | -3.191 | 0.001625373 | 0.004656896 | -1.656 | NoSig |
| RBM8A     | 0.378  | 10.104 | 3.179  | 0.001690961 | 0.004835497 | -1.692 | NoSig |
| HINT1     | -0.331 | 12.865 | -3.175 | 0.001710188 | 0.004881093 | -1.703 | NoSig |
| GRK5      | 0.491  | 8.382  | 3.169  | 0.001743795 | 0.004967478 | -1.720 | NoSig |
| AGK       | 0.543  | 8.779  | 3.169  | 0.001748056 | 0.004970094 | -1.722 | NoSig |
| TNRC6B    | -0.470 | 8.004  | -3.166 | 0.001761857 | 0.004998688 | -1.729 | NoSig |
| KIAA1731  | -0.949 | 4.300  | -3.166 | 0.001764836 | 0.004998688 | -1.731 | NoSig |
| TSGA10    | -0.541 | 6.474  | -3.164 | 0.001773139 | 0.005012658 | -1.735 | NoSig |
| RABEPK    | 0.429  | 8.670  | 3.161  | 0.001792842 | 0.005058739 | -1.745 | NoSig |
| ELL       | -0.451 | 7.411  | -3.158 | 0.001810259 | 0.005090878 | -1.754 | NoSig |
| HLA.F.AS1 | 0.432  | 8.266  | 3.158  | 0.001811079 | 0.005090878 | -1.754 | NoSig |

|          |        |        |        |             |             |        |       |
|----------|--------|--------|--------|-------------|-------------|--------|-------|
| GAB1     | -0.458 | 7.138  | -3.154 | 0.001832147 | 0.005140383 | -1.765 | NoSig |
| ATG2B    | -0.519 | 7.386  | -3.147 | 0.001874655 | 0.005249739 | -1.786 | NoSig |
| SMTN     | 0.500  | 8.333  | 3.147  | 0.001879076 | 0.005252223 | -1.788 | NoSig |
| SLC39A14 | 0.482  | 9.484  | 3.143  | 0.001901291 | 0.005304352 | -1.798 | NoSig |
| GATA1    | -0.524 | 6.633  | -3.141 | 0.001913211 | 0.005327611 | -1.804 | NoSig |
| DDX50    | 0.380  | 9.745  | 3.122  | 0.002034882 | 0.005655583 | -1.860 | NoSig |
| QKI      | -0.439 | 10.864 | -3.118 | 0.0020607   | 0.005716904 | -1.871 | NoSig |
| SNED1    | -0.434 | 7.534  | -3.107 | 0.002139068 | 0.005923267 | -1.905 | NoSig |
| C5orf42  | -0.883 | 5.455  | -3.096 | 0.002214043 | 0.006119484 | -1.936 | NoSig |
| C1S      | 0.861  | 10.774 | 3.089  | 0.002267435 | 0.006255429 | -1.958 | NoSig |
| APOL6    | -0.468 | 9.178  | -3.087 | 0.002277972 | 0.00627286  | -1.962 | NoSig |
| TPR      | -0.294 | 11.386 | -3.086 | 0.002287744 | 0.006288123 | -1.966 | NoSig |
| PGLS     | 0.333  | 9.649  | 3.084  | 0.002299144 | 0.006297471 | -1.970 | NoSig |
| MYOZ3    | -0.419 | 7.008  | -3.084 | 0.002299615 | 0.006297471 | -1.970 | NoSig |
| BEND5    | -0.318 | 7.142  | -3.078 | 0.002346965 | 0.006415325 | -1.989 | NoSig |
| EAF2     | 0.497  | 7.436  | 3.076  | 0.002361317 | 0.006442712 | -1.994 | NoSig |
| IL12RB1  | -0.523 | 5.745  | -3.071 | 0.00239888  | 0.006527226 | -2.009 | NoSig |
| ST7L     | -0.642 | 6.080  | -3.071 | 0.002401071 | 0.006527226 | -2.009 | NoSig |
| THRA     | -0.313 | 8.114  | -3.066 | 0.002439128 | 0.006614145 | -2.024 | NoSig |
| TMEM144  | -0.510 | 5.487  | -3.066 | 0.00244194  | 0.006614145 | -2.025 | NoSig |
| PDE4D    | -0.525 | 7.266  | -3.064 | 0.002454876 | 0.006637093 | -2.029 | NoSig |
| IKZF2    | -0.629 | 6.959  | -3.057 | 0.00250824  | 0.006769062 | -2.049 | NoSig |
| RAPGEF6  | -0.464 | 8.052  | -3.050 | 0.002565046 | 0.006909825 | -2.069 | NoSig |
| SP1      | -0.829 | 7.067  | -3.047 | 0.002589821 | 0.006963949 | -2.078 | NoSig |
| TM2D3    | -0.371 | 10.739 | -3.045 | 0.002605512 | 0.006993495 | -2.083 | NoSig |
| GPR173   | -0.523 | 6.055  | -3.043 | 0.002629073 | 0.007031095 | -2.091 | NoSig |
| ZNF277   | -0.373 | 8.558  | -3.042 | 0.002632841 | 0.007031095 | -2.093 | NoSig |
| POF1B    | -0.745 | 5.274  | -3.041 | 0.002643122 | 0.007031095 | -2.096 | NoSig |
| EPHB3    | 0.565  | 9.699  | 3.041  | 0.0026456   | 0.007031095 | -2.097 | NoSig |
| ACACB    | -0.554 | 7.518  | -3.040 | 0.002648037 | 0.007031095 | -2.098 | NoSig |
| CCDC144A | -0.779 | 4.544  | -3.040 | 0.002650269 | 0.007031095 | -2.099 | NoSig |
| RBL1     | -0.436 | 6.789  | -3.040 | 0.002652619 | 0.007031095 | -2.099 | NoSig |
| ARHGAP5  | -0.300 | 8.510  | -3.036 | 0.002688566 | 0.007112332 | -2.111 | NoSig |
| IGSF3    | 0.331  | 9.827  | 3.035  | 0.002692833 | 0.007112332 | -2.113 | NoSig |
| PECAM1   | 0.377  | 9.675  | 3.034  | 0.002703613 | 0.007128142 | -2.116 | NoSig |
| TPH1     | -0.723 | 3.803  | -3.030 | 0.002738261 | 0.007184599 | -2.128 | NoSig |
| CDON     | -0.632 | 4.368  | -3.030 | 0.002738416 | 0.007184599 | -2.128 | NoSig |
| CXorf36  | -0.473 | 5.391  | -3.030 | 0.002739521 | 0.007184599 | -2.128 | NoSig |
| SERPINB5 | 0.923  | 8.211  | 3.026  | 0.002767208 | 0.007244434 | -2.137 | NoSig |
| RAF1     | -0.196 | 10.276 | -3.024 | 0.002787874 | 0.007285708 | -2.144 | NoSig |
| MDFIC    | 0.477  | 9.518  | 3.017  | 0.002852247 | 0.007438363 | -2.165 | NoSig |
| ADAM23   | 0.504  | 7.336  | 3.016  | 0.002856292 | 0.007438363 | -2.166 | NoSig |
| CLEC7A   | -0.597 | 9.423  | -3.012 | 0.00289373  | 0.007522686 | -2.178 | NoSig |
| TTC37    | -0.320 | 8.371  | -3.010 | 0.002911143 | 0.007554746 | -2.183 | NoSig |
| KIAA0513 | 0.417  | 7.688  | 3.010  | 0.002916398 | 0.007555198 | -2.185 | NoSig |

|          |        |        |        |             |             |        |       |
|----------|--------|--------|--------|-------------|-------------|--------|-------|
| CSAD     | -0.394 | 7.966  | -3.008 | 0.002930147 | 0.00757479  | -2.189 | NoSig |
| MYLK     | 0.754  | 8.878  | 3.008  | 0.002934149 | 0.00757479  | -2.190 | NoSig |
| NAMPT    | -0.453 | 10.415 | -3.003 | 0.002977979 | 0.007674619 | -2.203 | NoSig |
| SNTG1    | 0.566  | 6.512  | 3.001  | 0.002999733 | 0.007717305 | -2.210 | NoSig |
| F11      | 0.695  | 6.200  | 2.999  | 0.003018672 | 0.007752617 | -2.216 | NoSig |
| ELMO2    | 0.287  | 7.927  | 2.998  | 0.003024108 | 0.007753186 | -2.217 | NoSig |
| MCF2     | -0.593 | 5.626  | -2.991 | 0.003098498 | 0.007930234 | -2.239 | NoSig |
| WWP2     | -0.346 | 9.295  | -2.988 | 0.00312955  | 0.007995945 | -2.248 | NoSig |
| MAF      | 0.388  | 8.136  | 2.979  | 0.003214312 | 0.008184387 | -2.272 | NoSig |
| ST8SIA4  | -0.519 | 6.972  | -2.975 | 0.003256852 | 0.008278528 | -2.284 | NoSig |
| YTHDF3   | -0.410 | 9.534  | -2.973 | 0.003270775 | 0.008299732 | -2.288 | NoSig |
| TNNT2    | 0.540  | 5.980  | 2.959  | 0.003418659 | 0.008660215 | -2.327 | NoSig |
| ZNF85    | -0.262 | 9.392  | -2.953 | 0.003489609 | 0.0088205   | -2.346 | NoSig |
| NPAS3    | 0.651  | 6.727  | 2.952  | 0.003493796 | 0.0088205   | -2.347 | NoSig |
| TTBK2    | -0.452 | 6.625  | -2.944 | 0.003583747 | 0.009032258 | -2.370 | NoSig |
| CCDC88A  | 0.495  | 7.015  | 2.927  | 0.003776925 | 0.009503025 | -2.417 | NoSig |
| NMNAT2   | -0.587 | 6.355  | -2.921 | 0.003848548 | 0.009666877 | -2.434 | NoSig |
| UBE2I    | 0.371  | 11.091 | 2.919  | 0.003875369 | 0.009717832 | -2.440 | NoSig |
| SLC2A4RG | -0.520 | 9.360  | -2.915 | 0.003925999 | 0.009828216 | -2.452 | NoSig |
| CAPRIN2  | -0.296 | 8.764  | -2.914 | 0.003939439 | 0.009845286 | -2.455 | NoSig |
| PLA2G4C  | 0.479  | 7.742  | 2.911  | 0.003965706 | 0.009894303 | -2.461 | NoSig |
| ACTR2    | -0.356 | 11.988 | -2.909 | 0.003992644 | 0.009944826 | -2.467 | NoSig |
| CLASP2   | -0.349 | 8.382  | -2.905 | 0.004048732 | 0.010067667 | -2.479 | NoSig |
| ADAM9    | -0.519 | 10.039 | -2.891 | 0.004227439 | 0.010494493 | -2.518 | NoSig |
| DYRK3    | 0.469  | 7.601  | 2.887  | 0.004269786 | 0.010581954 | -2.527 | NoSig |
| RERE     | 0.392  | 9.454  | 2.885  | 0.004299663 | 0.010638267 | -2.533 | NoSig |
| PSMD10   | -0.293 | 10.389 | -2.882 | 0.00433674  | 0.010695344 | -2.541 | NoSig |
| GALNT1   | -0.303 | 11.187 | -2.882 | 0.004337117 | 0.010695344 | -2.541 | NoSig |
| WFDC2    | 0.602  | 8.970  | 2.877  | 0.004406468 | 0.010848375 | -2.555 | NoSig |
| PRMT5    | -0.492 | 9.185  | -2.875 | 0.004432128 | 0.010891424 | -2.560 | NoSig |
| VASH1    | 0.332  | 8.035  | 2.874  | 0.004444237 | 0.010891424 | -2.562 | NoSig |
| MKNK1    | 0.299  | 9.505  | 2.874  | 0.004445928 | 0.010891424 | -2.563 | NoSig |
| CFI      | -0.544 | 8.202  | -2.873 | 0.004462731 | 0.010914607 | -2.566 | NoSig |
| SLC9A5   | -0.482 | 6.446  | -2.871 | 0.004489864 | 0.010962937 | -2.572 | NoSig |
| MAGIX    | -0.647 | 5.184  | -2.869 | 0.004520479 | 0.011001559 | -2.578 | NoSig |
| KLHL35   | -0.399 | 7.351  | -2.867 | 0.004542398 | 0.011009187 | -2.582 | NoSig |
| BCL10    | 0.403  | 8.917  | 2.867  | 0.004542701 | 0.011009187 | -2.582 | NoSig |
| ALB      | -0.601 | 5.800  | -2.867 | 0.004545824 | 0.011009187 | -2.583 | NoSig |
| RBMS3    | 0.492  | 7.757  | 2.854  | 0.004732742 | 0.011443232 | -2.619 | NoSig |
| CLDN11   | 0.450  | 7.484  | 2.853  | 0.004743726 | 0.011451169 | -2.621 | NoSig |
| CBX3     | 0.237  | 11.968 | 2.851  | 0.004771481 | 0.011499502 | -2.626 | NoSig |
| BTG1     | 0.404  | 10.968 | 2.844  | 0.004870222 | 0.011712266 | -2.644 | NoSig |
| ADAMTS9  | -0.218 | 8.585  | -2.844 | 0.004875516 | 0.011712266 | -2.645 | NoSig |
| OSMR     | -0.360 | 7.729  | -2.843 | 0.004884151 | 0.011714085 | -2.647 | NoSig |
| JAK2     | -0.334 | 8.085  | -2.835 | 0.005009322 | 0.011994947 | -2.669 | NoSig |

|          |        |        |        |             |             |        |       |
|----------|--------|--------|--------|-------------|-------------|--------|-------|
| ITGA9    | -0.457 | 7.058  | -2.828 | 0.005112333 | 0.012221928 | -2.687 | NoSig |
| CELF2    | 0.435  | 9.867  | 2.814  | 0.005336964 | 0.012694583 | -2.726 | NoSig |
| IQCG     | -0.399 | 9.138  | -2.814 | 0.005337915 | 0.012694583 | -2.726 | NoSig |
| ALDH1A3  | 0.810  | 7.689  | 2.813  | 0.005345936 | 0.012694583 | -2.727 | NoSig |
| POLR1B   | 0.527  | 9.098  | 2.813  | 0.005346214 | 0.012694583 | -2.727 | NoSig |
| NAGA     | -0.227 | 9.301  | -2.813 | 0.005352726 | 0.012694583 | -2.728 | NoSig |
| ULK2     | -0.262 | 7.807  | -2.800 | 0.00556532  | 0.013177757 | -2.763 | NoSig |
| MAP3K2   | -0.256 | 8.003  | -2.792 | 0.005698156 | 0.013470839 | -2.784 | NoSig |
| EXOSC10  | 0.302  | 8.443  | 2.791  | 0.005708162 | 0.013473073 | -2.786 | NoSig |
| PTCD2    | -0.523 | 5.593  | -2.784 | 0.005838406 | 0.013740722 | -2.806 | NoSig |
| CBY1     | 0.347  | 9.267  | 2.784  | 0.005840038 | 0.013740722 | -2.806 | NoSig |
| SERPINB8 | 0.347  | 7.422  | 2.783  | 0.005853176 | 0.013749879 | -2.808 | NoSig |
| ZNF254   | -0.669 | 6.093  | -2.772 | 0.006037254 | 0.014159931 | -2.835 | NoSig |
| ZNF41    | -0.649 | 5.093  | -2.770 | 0.006088004 | 0.014256475 | -2.843 | NoSig |
| PRR5L    | -0.532 | 6.423  | -2.767 | 0.006128831 | 0.014329514 | -2.849 | NoSig |
| LARP4    | -0.268 | 9.665  | -2.760 | 0.006269238 | 0.014630104 | -2.869 | NoSig |
| VASH2    | 0.655  | 7.224  | 2.759  | 0.006277072 | 0.014630104 | -2.870 | NoSig |
| PER3     | -0.413 | 7.877  | -2.756 | 0.006338749 | 0.014750735 | -2.879 | NoSig |
| MAP3K6   | 0.557  | 7.506  | 2.754  | 0.006378856 | 0.014820873 | -2.884 | NoSig |
| ACSL4    | -0.613 | 6.929  | -2.749 | 0.006468117 | 0.015004821 | -2.897 | NoSig |
| TMC7     | -0.450 | 6.071  | -2.748 | 0.006492194 | 0.015037215 | -2.900 | NoSig |
| TMEM151B | -0.328 | 7.446  | -2.746 | 0.006519725 | 0.015077499 | -2.904 | NoSig |
| LRCH3    | -0.306 | 8.004  | -2.745 | 0.006556657 | 0.015139362 | -2.909 | NoSig |
| LYZ      | -0.613 | 11.957 | -2.733 | 0.006784763 | 0.015641771 | -2.939 | NoSig |
| CPEB3    | -0.708 | 5.223  | -2.716 | 0.007122647 | 0.016395319 | -2.982 | NoSig |
| NT5DC2   | 0.522  | 9.004  | 2.712  | 0.007220046 | 0.01659383  | -2.994 | NoSig |
| VSTM4    | -0.496 | 4.154  | -2.709 | 0.007278632 | 0.016702663 | -3.001 | NoSig |
| ZNF146   | -0.290 | 10.661 | -2.704 | 0.007384636 | 0.016919806 | -3.014 | NoSig |
| PDXK     | 0.359  | 10.585 | 2.702  | 0.007427214 | 0.016991181 | -3.019 | NoSig |
| RIN3     | 0.413  | 8.404  | 2.701  | 0.007439909 | 0.016994078 | -3.021 | NoSig |
| SLC17A4  | 0.700  | 6.585  | 2.696  | 0.007546215 | 0.017210462 | -3.033 | NoSig |
| PDE1C    | -0.401 | 7.895  | -2.693 | 0.007619532 | 0.017351063 | -3.042 | NoSig |
| WDR19    | 0.320  | 8.143  | 2.690  | 0.007684218 | 0.017471609 | -3.049 | NoSig |
| COTL1    | 0.406  | 10.500 | 2.683  | 0.007854909 | 0.017832443 | -3.069 | NoSig |
| CEP41    | 0.398  | 7.355  | 2.681  | 0.007901931 | 0.017911847 | -3.074 | NoSig |
| CD6      | 0.434  | 8.628  | 2.678  | 0.007962901 | 0.018022579 | -3.081 | NoSig |
| FKBP15   | 0.219  | 9.794  | 2.677  | 0.007982867 | 0.018040309 | -3.083 | NoSig |
| BCL2L2   | 0.210  | 9.018  | 2.673  | 0.008070771 | 0.018211285 | -3.092 | NoSig |
| SEC62    | 0.301  | 10.438 | 2.672  | 0.008093049 | 0.018233885 | -3.095 | NoSig |
| ANKH     | -0.628 | 5.575  | -2.668 | 0.00819589  | 0.018437652 | -3.106 | NoSig |
| MTMR11   | -0.293 | 8.846  | -2.666 | 0.008253528 | 0.018539269 | -3.112 | NoSig |
| CRYBB2P1 | -0.487 | 6.756  | -2.660 | 0.008377903 | 0.01879026  | -3.125 | NoSig |
| USPL1    | 0.209  | 8.529  | 2.658  | 0.008422758 | 0.018826055 | -3.130 | NoSig |
| KIAA0430 | -0.325 | 9.448  | -2.658 | 0.008427736 | 0.018826055 | -3.131 | NoSig |
| PLXNA3   | -0.280 | 8.269  | -2.658 | 0.008431844 | 0.018826055 | -3.131 | NoSig |

|          |        |        |        |             |             |        |       |
|----------|--------|--------|--------|-------------|-------------|--------|-------|
| MTDH     | 0.306  | 11.689 | 2.652  | 0.008575489 | 0.019092365 | -3.146 | NoSig |
| PRDM11   | -0.343 | 7.404  | -2.652 | 0.008576978 | 0.019092365 | -3.146 | NoSig |
| NDST2    | 0.249  | 8.348  | 2.652  | 0.008589638 | 0.019092365 | -3.147 | NoSig |
| EPHA7    | -0.613 | 4.594  | -2.650 | 0.008618284 | 0.019127446 | -3.150 | NoSig |
| RAI1     | -0.637 | 5.332  | -2.647 | 0.00871615  | 0.019315821 | -3.160 | NoSig |
| STAP1    | -0.643 | 6.308  | -2.643 | 0.008813304 | 0.019502058 | -3.170 | NoSig |
| DOK5     | -0.302 | 8.999  | -2.630 | 0.009143121 | 0.020201814 | -3.202 | NoSig |
| FAM53B   | 0.265  | 9.720  | 2.624  | 0.009299527 | 0.02051691  | -3.217 | NoSig |
| SUV39H2  | -0.663 | 6.318  | -2.620 | 0.009404153 | 0.020717002 | -3.227 | NoSig |
| G6PC     | -0.628 | 3.434  | -2.618 | 0.009459434 | 0.020807957 | -3.232 | NoSig |
| FAR2     | -0.665 | 7.174  | -2.617 | 0.009475558 | 0.020812636 | -3.234 | NoSig |
| NELL1    | -0.340 | 5.010  | -2.613 | 0.009581731 | 0.0210148   | -3.244 | NoSig |
| FRAS1    | 0.450  | 7.326  | 2.612  | 0.009610204 | 0.021046206 | -3.246 | NoSig |
| PADI2    | 0.397  | 10.255 | 2.609  | 0.009690939 | 0.021191803 | -3.254 | NoSig |
| KLF6     | -0.557 | 9.723  | -2.607 | 0.009762933 | 0.021317887 | -3.260 | NoSig |
| RPAP3    | -0.381 | 8.232  | -2.604 | 0.009848646 | 0.021455023 | -3.268 | NoSig |
| SLC9A1   | 0.432  | 6.240  | 2.603  | 0.009854594 | 0.021455023 | -3.268 | NoSig |
| IGFBP5   | 0.686  | 10.474 | 2.601  | 0.009934374 | 0.021597097 | -3.275 | NoSig |
| HIF3A    | -0.382 | 6.976  | -2.591 | 0.01020214  | 0.022135224 | -3.299 | NoSig |
| NFS1     | 0.205  | 8.906  | 2.591  | 0.010211677 | 0.022135224 | -3.300 | NoSig |
| UNC5C    | -0.481 | 5.639  | -2.589 | 0.010261287 | 0.022210384 | -3.304 | NoSig |
| PPP2R5C  | -0.306 | 9.831  | -2.581 | 0.010485242 | 0.022662143 | -3.323 | NoSig |
| MANEA    | -0.755 | 5.696  | -2.580 | 0.010518266 | 0.022700524 | -3.326 | NoSig |
| NAV2     | 0.409  | 8.600  | 2.577  | 0.010621542 | 0.022890193 | -3.334 | NoSig |
| CHML     | -0.515 | 6.741  | -2.573 | 0.010728462 | 0.023087154 | -3.343 | NoSig |
| ICK      | 0.429  | 6.172  | 2.569  | 0.010843843 | 0.023301726 | -3.352 | NoSig |
| SCIN     | -0.454 | 6.672  | -2.566 | 0.010940947 | 0.023455334 | -3.360 | NoSig |
| PRUNE2   | 0.352  | 7.783  | 2.566  | 0.010946874 | 0.023455334 | -3.361 | NoSig |
| FBXO7    | -0.266 | 11.382 | -2.556 | 0.011251994 | 0.024074409 | -3.385 | NoSig |
| C12orf49 | 0.469  | 9.113  | 2.554  | 0.011328191 | 0.024202614 | -3.391 | NoSig |
| NBR1     | 0.191  | 9.502  | 2.535  | 0.011931753 | 0.025455547 | -3.436 | NoSig |
| SCRN3    | -0.302 | 6.993  | -2.531 | 0.01207712  | 0.025728763 | -3.447 | NoSig |
| JAK1     | -0.284 | 10.644 | -2.522 | 0.01237634  | 0.026328495 | -3.468 | NoSig |
| HDAC4    | 0.348  | 7.390  | 2.516  | 0.012589551 | 0.026731625 | -3.483 | NoSig |
| CASC5    | -0.770 | 4.939  | -2.515 | 0.012601795 | 0.026731625 | -3.484 | NoSig |
| CSPP1    | -0.313 | 8.872  | -2.514 | 0.012631505 | 0.026756478 | -3.486 | NoSig |
| CSRNP3   | -0.472 | 4.670  | -2.514 | 0.012656966 | 0.026772273 | -3.488 | NoSig |
| RRP8     | 0.277  | 8.432  | 2.513  | 0.012676177 | 0.026774823 | -3.489 | NoSig |
| KAT6B    | 0.404  | 8.770  | 2.513  | 0.012698193 | 0.02678328  | -3.490 | NoSig |
| PPP1R12B | -0.222 | 8.592  | -2.510 | 0.012784014 | 0.026926103 | -3.496 | NoSig |
| TBC1D12  | -0.224 | 8.356  | -2.505 | 0.012955288 | 0.02724825  | -3.508 | NoSig |
| GIN1     | -0.238 | 7.714  | -2.504 | 0.012993897 | 0.027290855 | -3.511 | NoSig |
| FKBP4    | 0.405  | 10.697 | 2.499  | 0.013194285 | 0.027672641 | -3.524 | NoSig |
| ITSN1    | 0.366  | 8.838  | 2.495  | 0.013324841 | 0.027907096 | -3.532 | NoSig |
| SSTR3    | -0.316 | 4.872  | -2.493 | 0.013385059 | 0.027993788 | -3.536 | NoSig |



|           |        |        |        |             |             |        |       |
|-----------|--------|--------|--------|-------------|-------------|--------|-------|
| SCTR      | -0.483 | 5.773  | -2.491 | 0.013490602 | 0.028174895 | -3.543 | NoSig |
| ZBTB3     | -0.493 | 6.310  | -2.486 | 0.013666368 | 0.028501949 | -3.554 | NoSig |
| BAHCC1    | 0.491  | 6.838  | 2.480  | 0.01386994  | 0.028885995 | -3.567 | NoSig |
| ACAP2     | -0.367 | 9.093  | -2.477 | 0.013994215 | 0.029104052 | -3.575 | NoSig |
| AREG      | 0.556  | 6.434  | 2.476  | 0.014022016 | 0.02911506  | -3.577 | NoSig |
| MBNL1     | 0.265  | 10.930 | 2.476  | 0.014038667 | 0.02911506  | -3.578 | NoSig |
| PTPN21    | -0.482 | 6.435  | -2.470 | 0.014260869 | 0.029533576 | -3.592 | NoSig |
| ASXL2     | 0.159  | 9.737  | 2.470  | 0.014280189 | 0.029533576 | -3.593 | NoSig |
| PACS2     | -0.191 | 8.841  | -2.468 | 0.014344864 | 0.02962613  | -3.597 | NoSig |
| LRRC15    | 0.350  | 8.590  | 2.467  | 0.014393076 | 0.029684471 | -3.600 | NoSig |
| NFYC      | 0.307  | 9.110  | 2.462  | 0.014587417 | 0.030043615 | -3.611 | NoSig |
| EIF4G3    | -0.296 | 8.789  | -2.460 | 0.014655035 | 0.03014113  | -3.615 | NoSig |
| PEX2      | 0.252  | 9.250  | 2.459  | 0.014700252 | 0.030192368 | -3.618 | NoSig |
| UBA6      | -0.286 | 8.062  | -2.458 | 0.014750908 | 0.03025462  | -3.621 | NoSig |
| CALML4    | -0.445 | 7.579  | -2.448 | 0.015129801 | 0.030989    | -3.643 | NoSig |
| MAN1A2    | -0.194 | 10.158 | -2.444 | 0.015295872 | 0.031286054 | -3.652 | NoSig |
| VRK3      | 0.311  | 8.714  | 2.442  | 0.015398584 | 0.031426768 | -3.658 | NoSig |
| HCG18     | -0.412 | 7.102  | -2.442 | 0.015406936 | 0.031426768 | -3.659 | NoSig |
| IFIH1     | 0.503  | 8.709  | 2.440  | 0.015456227 | 0.031484123 | -3.662 | NoSig |
| CAD       | 0.257  | 9.258  | 2.434  | 0.015740835 | 0.032020001 | -3.677 | NoSig |
| RMND1     | -0.272 | 7.590  | -2.433 | 0.015773468 | 0.03204255  | -3.679 | NoSig |
| LSM14B    | -0.557 | 6.679  | -2.429 | 0.015942399 | 0.032331788 | -3.688 | NoSig |
| CHRM3     | 0.528  | 6.649  | 2.429  | 0.015959336 | 0.032331788 | -3.689 | NoSig |
| HEATR2    | 0.221  | 10.054 | 2.428  | 0.015993043 | 0.032355994 | -3.691 | NoSig |
| LOC389906 | -0.727 | 5.978  | -2.420 | 0.016322026 | 0.032976701 | -3.709 | NoSig |
| PTK2      | 0.346  | 10.081 | 2.417  | 0.0164796   | 0.033249885 | -3.717 | NoSig |
| SH3YL1    | 0.427  | 10.795 | 2.403  | 0.017081534 | 0.034417671 | -3.748 | NoSig |
| TMEM134   | 0.195  | 9.496  | 2.399  | 0.017255441 | 0.03472103  | -3.757 | NoSig |
| ACVR2B    | 0.292  | 8.719  | 2.398  | 0.017327244 | 0.034818395 | -3.761 | NoSig |
| LRRC48    | -0.249 | 7.395  | -2.395 | 0.017450648 | 0.035010376 | -3.767 | NoSig |
| BTRC      | 0.287  | 7.879  | 2.395  | 0.017469872 | 0.035010376 | -3.768 | NoSig |
| GNB5      | 0.279  | 7.649  | 2.394  | 0.017514815 | 0.035053203 | -3.770 | NoSig |
| VNN3      | -0.447 | 5.716  | -2.388 | 0.017762286 | 0.035500697 | -3.782 | NoSig |
| LRRC41    | -0.305 | 9.072  | -2.384 | 0.017951692 | 0.035831096 | -3.791 | NoSig |
| CD209     | -0.252 | 7.874  | -2.383 | 0.01800961  | 0.035898512 | -3.794 | NoSig |
| SDS       | 0.303  | 8.329  | 2.382  | 0.018043208 | 0.035917336 | -3.796 | NoSig |
| VCPIP1    | -0.510 | 6.326  | -2.381 | 0.018103749 | 0.035989671 | -3.798 | NoSig |
| ZNF230    | -0.443 | 6.000  | -2.376 | 0.01836233  | 0.036454986 | -3.811 | NoSig |
| SOBP      | 0.398  | 7.800  | 2.375  | 0.018390257 | 0.03646175  | -3.812 | NoSig |
| MEIS1     | -0.289 | 7.573  | -2.367 | 0.01878717  | 0.037199096 | -3.830 | NoSig |
| SAMHD1    | -0.434 | 8.762  | -2.366 | 0.018849801 | 0.037273477 | -3.833 | NoSig |
| FAM178A   | -0.217 | 7.894  | -2.365 | 0.018903171 | 0.037329371 | -3.836 | NoSig |
| PEX13     | -0.482 | 7.775  | -2.362 | 0.019022559 | 0.037515312 | -3.841 | NoSig |
| CD55      | -0.309 | 9.828  | -2.357 | 0.019316201 | 0.038043962 | -3.854 | NoSig |
| SYNRG     | 0.316  | 8.411  | 2.356  | 0.019371094 | 0.03810161  | -3.857 | NoSig |

|           |        |        |        |             |             |        |       |
|-----------|--------|--------|--------|-------------|-------------|--------|-------|
| SLC30A5   | -0.318 | 8.468  | -2.352 | 0.019525709 | 0.038354992 | -3.864 | NoSig |
| ERCC8     | -0.232 | 8.116  | -2.351 | 0.019585594 | 0.038421871 | -3.866 | NoSig |
| CSF3R     | -0.500 | 7.553  | -2.346 | 0.019854922 | 0.038898906 | -3.878 | NoSig |
| CARHSP1   | 0.438  | 8.453  | 2.345  | 0.019926202 | 0.038987187 | -3.881 | NoSig |
| CLDND1    | -0.380 | 9.239  | -2.330 | 0.020726625 | 0.040499988 | -3.915 | NoSig |
| DHX30     | -0.143 | 9.453  | -2.327 | 0.020885641 | 0.04075715  | -3.922 | NoSig |
| RBPM5     | 0.416  | 8.908  | 2.326  | 0.020941143 | 0.040811901 | -3.924 | NoSig |
| ACTR3B    | -0.360 | 8.749  | -2.324 | 0.021049045 | 0.040930433 | -3.928 | NoSig |
| METTL8    | -0.719 | 6.574  | -2.324 | 0.021057015 | 0.040930433 | -3.929 | NoSig |
| NDUFA10   | 0.244  | 10.359 | 2.320  | 0.021236254 | 0.041224947 | -3.936 | NoSig |
| FOXC1     | 0.420  | 9.884  | 2.316  | 0.021496711 | 0.041676153 | -3.946 | NoSig |
| DLEU2     | -0.272 | 7.546  | -2.314 | 0.02156185  | 0.041748008 | -3.949 | NoSig |
| BIN3      | 0.228  | 8.769  | 2.314  | 0.021590273 | 0.041748681 | -3.950 | NoSig |
| TRAPPC10  | -0.477 | 7.120  | -2.309 | 0.021886143 | 0.042265837 | -3.962 | NoSig |
| NEUROD2   | 0.478  | 7.596  | 2.307  | 0.021987788 | 0.042407057 | -3.966 | NoSig |
| CHPT1     | 0.361  | 10.308 | 2.306  | 0.022044622 | 0.042461597 | -3.968 | NoSig |
| KIDINS220 | 0.217  | 9.493  | 2.304  | 0.022141087 | 0.042577917 | -3.972 | NoSig |
| HIPK1     | 0.205  | 9.111  | 2.304  | 0.022162278 | 0.042577917 | -3.973 | NoSig |
| CLN6      | -0.784 | 6.326  | -2.303 | 0.022209266 | 0.042613134 | -3.974 | NoSig |
| GFOD1     | 0.222  | 9.350  | 2.300  | 0.022377201 | 0.042880022 | -3.981 | NoSig |
| MARK1     | -0.245 | 8.034  | -2.299 | 0.022459467 | 0.042982274 | -3.984 | NoSig |
| CYP4B1    | -0.607 | 5.299  | -2.297 | 0.022560765 | 0.04312064  | -3.988 | NoSig |
| HDAC9     | -0.421 | 7.484  | -2.295 | 0.022644256 | 0.043224658 | -3.991 | NoSig |
| DENND4A   | -0.614 | 5.794  | -2.292 | 0.022850222 | 0.043561898 | -3.999 | NoSig |
| CTNNB1    | -0.309 | 11.149 | -2.291 | 0.02293189  | 0.043661614 | -4.002 | NoSig |
| TAF5      | -0.321 | 8.315  | -2.289 | 0.023003146 | 0.043741275 | -4.004 | NoSig |
| PIGL      | 0.364  | 8.282  | 2.288  | 0.0230885   | 0.043813594 | -4.008 | NoSig |
| NEMF      | -0.293 | 9.410  | -2.288 | 0.023100106 | 0.043813594 | -4.008 | NoSig |
| MCCC2     | 0.312  | 9.851  | 2.287  | 0.023138332 | 0.043830191 | -4.009 | NoSig |
| MBNL2     | 0.442  | 9.205  | 2.285  | 0.023276859 | 0.044036501 | -4.015 | NoSig |
| LMO7      | -0.493 | 5.799  | -2.282 | 0.023448193 | 0.044304273 | -4.021 | NoSig |
| PPFIA2    | -0.353 | 5.786  | -2.279 | 0.023643816 | 0.044617201 | -4.028 | NoSig |
| LINS      | -0.591 | 5.614  | -2.277 | 0.023731899 | 0.044726659 | -4.031 | NoSig |
| ZNF493    | -0.573 | 5.939  | -2.275 | 0.023890666 | 0.044968887 | -4.037 | NoSig |
| DOPEY1    | 0.182  | 8.341  | 2.271  | 0.024093119 | 0.045292071 | -4.044 | NoSig |
| PRR14     | -0.166 | 10.162 | -2.271 | 0.024123287 | 0.045292071 | -4.045 | NoSig |
| ATF1      | -0.443 | 8.049  | -2.270 | 0.024153741 | 0.045292071 | -4.046 | NoSig |
| RARS2     | -0.711 | 4.803  | -2.264 | 0.024559325 | 0.045994605 | -4.060 | NoSig |
| MAPK1     | -0.194 | 9.903  | -2.263 | 0.024590976 | 0.04599595  | -4.062 | NoSig |
| TBC1D1    | 0.204  | 9.387  | 2.260  | 0.024797277 | 0.046323556 | -4.069 | NoSig |
| FGD6      | -0.442 | 6.992  | -2.259 | 0.024837754 | 0.046340954 | -4.070 | NoSig |
| IREB2     | -0.323 | 7.079  | -2.257 | 0.024970805 | 0.046530811 | -4.075 | NoSig |
| KIAA1467  | 0.381  | 8.402  | 2.255  | 0.025134579 | 0.04677737  | -4.080 | NoSig |
| PTRF      | 0.518  | 9.569  | 2.251  | 0.02534051  | 0.047101673 | -4.087 | NoSig |
| SAR1B     | -0.318 | 8.926  | -2.248 | 0.02556002  | 0.047450375 | -4.095 | NoSig |

|           |        |       |        |             |             |        |       |
|-----------|--------|-------|--------|-------------|-------------|--------|-------|
| FOXJ2     | 0.286  | 9.237 | 2.243  | 0.025855897 | 0.0479398   | -4.104 | NoSig |
| DISC1     | 0.297  | 6.983 | 2.240  | 0.026106025 | 0.048343286 | -4.113 | NoSig |
| PTPRS     | -0.465 | 5.312 | -2.238 | 0.026213992 | 0.048482843 | -4.116 | NoSig |
| GPR6      | -0.444 | 4.966 | -2.237 | 0.026274942 | 0.048535204 | -4.118 | NoSig |
| APBB1IP   | -0.372 | 7.265 | -2.235 | 0.026388547 | 0.048684577 | -4.122 | NoSig |
| NRP1      | 0.463  | 7.812 | 2.231  | 0.026707981 | 0.049212847 | -4.132 | NoSig |
| MTUS2     | -0.418 | 4.039 | -2.227 | 0.026955855 | 0.049608115 | -4.140 | NoSig |
| MCF2L     | 0.259  | 9.374 | 2.226  | 0.026998118 | 0.049624477 | -4.141 | NoSig |
| AGBL3     | -0.676 | 3.486 | -2.224 | 0.027168984 | 0.049876888 | -4.147 | NoSig |
| DTYMK     | -0.332 | 8.817 | -2.220 | 0.027417185 | 0.050270473 | -4.154 | NoSig |
| FRMD4A    | 0.318  | 7.912 | 2.217  | 0.027666937 | 0.05066593  | -4.162 | NoSig |
| TMLHE     | -0.438 | 5.517 | -2.214 | 0.027833668 | 0.050908566 | -4.167 | NoSig |
| TTF2      | 0.309  | 6.987 | 2.210  | 0.02816313  | 0.051447879 | -4.177 | NoSig |
| TRIM37    | 0.234  | 9.596 | 2.203  | 0.028634903 | 0.052245522 | -4.191 | NoSig |
| SLC6A11   | -0.417 | 5.159 | -2.196 | 0.029130979 | 0.053085497 | -4.206 | NoSig |
| ATP6V1H   | 0.230  | 9.835 | 2.189  | 0.029656303 | 0.053976649 | -4.221 | NoSig |
| SYN2      | -0.365 | 8.053 | -2.187 | 0.029783472 | 0.054141837 | -4.225 | NoSig |
| PCSK6     | 0.314  | 7.651 | 2.181  | 0.030228735 | 0.054884162 | -4.237 | NoSig |
| PDE1A     | -0.375 | 6.238 | -2.180 | 0.030335398 | 0.055010655 | -4.240 | NoSig |
| EBF2      | -0.418 | 5.783 | -2.175 | 0.030676016 | 0.055553581 | -4.250 | NoSig |
| PRF1      | -0.344 | 8.739 | -2.175 | 0.030709512 | 0.055553581 | -4.251 | NoSig |
| TXLNA     | 0.344  | 8.507 | 2.169  | 0.031150748 | 0.056283307 | -4.263 | NoSig |
| ZCCHC10   | 0.276  | 7.427 | 2.168  | 0.031251016 | 0.056395948 | -4.265 | NoSig |
| KDM4C     | 0.152  | 8.960 | 2.167  | 0.031320447 | 0.056452732 | -4.267 | NoSig |
| SLC44A4   | -0.467 | 5.964 | -2.163 | 0.031584853 | 0.056860384 | -4.274 | NoSig |
| PTPN7     | 0.237  | 8.750 | 2.154  | 0.032299218 | 0.058076103 | -4.293 | NoSig |
| PWP2      | 0.398  | 7.919 | 2.154  | 0.032358753 | 0.058112882 | -4.295 | NoSig |
| RUFY2     | -0.409 | 6.598 | -2.150 | 0.032661354 | 0.058585566 | -4.303 | NoSig |
| LTB       | 0.448  | 8.945 | 2.146  | 0.032926096 | 0.058989283 | -4.310 | NoSig |
| RPS6KA5   | 0.325  | 7.960 | 2.145  | 0.033011844 | 0.059071736 | -4.312 | NoSig |
| HP1BP3    | -0.494 | 6.273 | -2.141 | 0.033334803 | 0.059577947 | -4.320 | NoSig |
| RHOBTB2   | -0.342 | 5.955 | -2.138 | 0.033598185 | 0.059976591 | -4.327 | NoSig |
| CNTN1     | 0.378  | 7.720 | 2.132  | 0.034091497 | 0.060784241 | -4.339 | NoSig |
| BSDC1     | 0.181  | 9.389 | 2.132  | 0.034140095 | 0.060797989 | -4.340 | NoSig |
| UHRF1BP1L | -0.481 | 6.920 | -2.127 | 0.034550985 | 0.061456119 | -4.350 | NoSig |
| KCTD17    | -0.352 | 6.066 | -2.122 | 0.034911472 | 0.061999932 | -4.359 | NoSig |
| RBFOX1    | 0.425  | 6.440 | 2.122  | 0.03494011  | 0.061999932 | -4.360 | NoSig |
| KDSR      | 0.171  | 9.494 | 2.120  | 0.03508437  | 0.062116674 | -4.363 | NoSig |
| OTOF      | 0.410  | 4.029 | 2.120  | 0.035119028 | 0.062116674 | -4.364 | NoSig |
| ZNF135    | -0.594 | 5.936 | -2.120 | 0.035131219 | 0.062116674 | -4.364 | NoSig |
| HOMER2    | -0.295 | 8.182 | -2.118 | 0.035303049 | 0.062346358 | -4.368 | NoSig |
| RPRD1A    | -0.280 | 8.787 | -2.115 | 0.035506599 | 0.06263145  | -4.373 | NoSig |
| ITGAL     | -0.353 | 7.479 | -2.111 | 0.035858483 | 0.063177208 | -4.381 | NoSig |
| RARA      | 0.342  | 7.549 | 2.103  | 0.036572073 | 0.064358191 | -4.398 | NoSig |
| CRTAC1    | 0.450  | 7.285 | 2.102  | 0.036657376 | 0.064403798 | -4.400 | NoSig |

|          |        |        |        |             |             |        |       |
|----------|--------|--------|--------|-------------|-------------|--------|-------|
| GRIK2    | -0.261 | 4.010  | -2.102 | 0.036684611 | 0.064403798 | -4.401 | NoSig |
| FBXO22   | -0.446 | 5.191  | -2.099 | 0.036922827 | 0.064745571 | -4.406 | NoSig |
| HIST1H1T | -0.387 | 5.127  | -2.096 | 0.037179972 | 0.065119691 | -4.412 | NoSig |
| VPS13B   | -0.276 | 8.755  | -2.084 | 0.038322083 | 0.067041102 | -4.437 | NoSig |
| ATXN1    | 0.294  | 8.442  | 2.083  | 0.038438502 | 0.067165749 | -4.440 | NoSig |
| GINS4    | -0.319 | 7.457  | -2.073 | 0.039283623 | 0.06856191  | -4.458 | NoSig |
| CBS      | -0.364 | 8.587  | -2.068 | 0.0397779   | 0.069343186 | -4.468 | NoSig |
| SIRT2    | 0.252  | 9.816  | 2.066  | 0.040032096 | 0.069704598 | -4.474 | NoSig |
| ZNF506   | -0.362 | 6.967  | -2.062 | 0.040415601 | 0.070268184 | -4.482 | NoSig |
| ZNF451   | -0.260 | 8.797  | -2.061 | 0.04045028  | 0.070268184 | -4.483 | NoSig |
| RP2      | 0.279  | 6.416  | 2.060  | 0.040593315 | 0.070434375 | -4.485 | NoSig |
| ABCC9    | -0.255 | 7.411  | -2.038 | 0.042729225 | 0.074054029 | -4.528 | NoSig |
| ARHGAP22 | 0.319  | 7.192  | 2.035  | 0.043009504 | 0.074453007 | -4.534 | NoSig |
| ARPP21   | -0.344 | 4.215  | -2.025 | 0.044043337 | 0.076154002 | -4.554 | NoSig |
| C11orf57 | -0.161 | 8.951  | -2.021 | 0.044498847 | 0.076852248 | -4.562 | NoSig |
| TEAD1    | -0.309 | 7.898  | -2.016 | 0.04501786  | 0.077658419 | -4.572 | NoSig |
| TONSL    | -0.479 | 3.563  | -2.011 | 0.045547064 | 0.078480283 | -4.581 | NoSig |
| FGFR4    | -0.405 | 6.200  | -2.010 | 0.045670128 | 0.07851886  | -4.584 | NoSig |
| ADAMTSL3 | 0.248  | 6.979  | 2.010  | 0.04567506  | 0.07851886  | -4.584 | NoSig |
| KCNMB1   | 0.280  | 8.752  | 2.009  | 0.045745226 | 0.078548673 | -4.585 | NoSig |
| TRIM36   | 0.387  | 5.600  | 1.994  | 0.047329352 | 0.081175025 | -4.613 | NoSig |
| C10orf76 | -0.316 | 7.346  | -1.992 | 0.0475974   | 0.081540708 | -4.618 | NoSig |
| RHOB     | 0.346  | 9.587  | 1.989  | 0.047923422 | 0.08200475  | -4.624 | NoSig |
| TYMS     | 0.293  | 11.835 | 1.984  | 0.04843888  | 0.08279151  | -4.633 | NoSig |
| ZBED1    | 0.204  | 9.030  | 1.976  | 0.049339862 | 0.084234643 | -4.648 | NoSig |
| TROAP    | 0.176  | 9.177  | 1.975  | 0.049490415 | 0.084394779 | -4.650 | NoSig |
| SLC5A3   | -0.272 | 9.625  | -1.970 | 0.050136707 | 0.085339779 | -4.661 | NoSig |
| ASPHD1   | -0.443 | 4.613  | -1.969 | 0.050159359 | 0.085339779 | -4.661 | NoSig |
| ZNF26    | -0.180 | 8.625  | -1.966 | 0.050594454 | 0.08598166  | -4.669 | NoSig |
| SLC29A2  | -0.325 | 7.003  | -1.965 | 0.050709391 | 0.086078612 | -4.670 | NoSig |
| AHNAK2   | -0.481 | 8.413  | -1.963 | 0.050918515 | 0.086335041 | -4.674 | NoSig |
| TNR      | -0.218 | 7.305  | -1.960 | 0.051195754 | 0.086706248 | -4.678 | NoSig |
| DIP2C    | -0.239 | 9.448  | -1.954 | 0.051925566 | 0.087842226 | -4.690 | NoSig |
| ATP4B    | -0.309 | 6.160  | -1.953 | 0.052061016 | 0.087971285 | -4.692 | NoSig |
| PPARA    | 0.229  | 6.974  | 1.951  | 0.052346008 | 0.088352457 | -4.697 | NoSig |
| DOCK5    | 0.303  | 7.351  | 1.950  | 0.052438696 | 0.08840855  | -4.698 | NoSig |
| KANSL3   | -0.438 | 5.562  | -1.945 | 0.053055333 | 0.089346864 | -4.708 | NoSig |
| EMID1    | 0.435  | 7.362  | 1.944  | 0.053118396 | 0.089351872 | -4.709 | NoSig |
| PTPRB    | 0.360  | 5.826  | 1.943  | 0.053337387 | 0.089618863 | -4.712 | NoSig |
| C1orf61  | 0.433  | 8.034  | 1.939  | 0.053763562 | 0.090232975 | -4.719 | NoSig |
| FBN2     | 0.341  | 7.201  | 1.934  | 0.054377499 | 0.091106102 | -4.728 | NoSig |
| ARHGAP29 | 0.299  | 9.750  | 1.934  | 0.054406334 | 0.091106102 | -4.728 | NoSig |
| MS4A4A   | -0.422 | 8.141  | -1.933 | 0.054571093 | 0.09122331  | -4.731 | NoSig |
| RFC2     | -0.197 | 8.975  | -1.932 | 0.054599022 | 0.09122331  | -4.731 | NoSig |
| EGFR     | 0.289  | 8.493  | 1.926  | 0.055384377 | 0.09236847  | -4.743 | NoSig |

|            |        |        |        |             |             |        |       |
|------------|--------|--------|--------|-------------|-------------|--------|-------|
| H6PD       | -0.279 | 7.497  | -1.926 | 0.055408659 | 0.09236847  | -4.743 | NoSig |
| RANBP10    | -0.155 | 8.459  | -1.923 | 0.055769297 | 0.09286556  | -4.749 | NoSig |
| CLK4       | -0.190 | 9.234  | -1.920 | 0.056089917 | 0.093294974 | -4.754 | NoSig |
| FCER1G     | -0.259 | 10.648 | -1.917 | 0.056559679 | 0.09397122  | -4.760 | NoSig |
| ZNF207     | -0.154 | 11.415 | -1.915 | 0.056798334 | 0.094246832 | -4.764 | NoSig |
| SEPW1      | -0.210 | 11.545 | -1.914 | 0.056852326 | 0.094246832 | -4.765 | NoSig |
| ZNF654     | -0.268 | 7.889  | -1.908 | 0.057699224 | 0.095350685 | -4.777 | NoSig |
| OR2H1      | 0.313  | 6.587  | 1.908  | 0.0577015   | 0.095350685 | -4.777 | NoSig |
| TAPBP      | 0.237  | 11.091 | 1.908  | 0.057710569 | 0.095350685 | -4.777 | NoSig |
| MPP6       | -0.469 | 6.017  | -1.907 | 0.057796304 | 0.095386353 | -4.778 | NoSig |
| OGDH       | -0.169 | 8.630  | -1.899 | 0.058831237 | 0.096986751 | -4.793 | NoSig |
| BTN2A2     | 0.158  | 9.126  | 1.897  | 0.059108266 | 0.097335539 | -4.797 | NoSig |
| FAM188A    | -0.310 | 8.024  | -1.894 | 0.059533122 | 0.097926717 | -4.802 | NoSig |
| SLC33A1    | -0.201 | 9.108  | -1.889 | 0.060264658 | 0.099020494 | -4.812 | NoSig |
| DNAH3      | 0.502  | 10.157 | 1.882  | 0.061107422 | 0.100294411 | -4.824 | NoSig |
| MBP        | 0.245  | 9.241  | 1.879  | 0.061499467 | 0.10082658  | -4.829 | NoSig |
| FCER1A     | 0.353  | 6.200  | 1.877  | 0.061864817 | 0.101313858 | -4.834 | NoSig |
| SIRPB1     | -0.257 | 6.012  | -1.875 | 0.062164361 | 0.101692414 | -4.838 | NoSig |
| KCNK1      | 0.303  | 9.414  | 1.873  | 0.062327402 | 0.101847084 | -4.840 | NoSig |
| ST6GALNAC5 | 0.309  | 7.777  | 1.870  | 0.062837492 | 0.102567893 | -4.847 | NoSig |
| SMAD4      | -0.162 | 8.607  | -1.868 | 0.063024617 | 0.102760533 | -4.849 | NoSig |
| SPAG16     | 0.303  | 7.196  | 1.864  | 0.063683667 | 0.103721372 | -4.857 | NoSig |
| SMC1A      | -0.232 | 10.464 | -1.863 | 0.063848779 | 0.103876514 | -4.860 | NoSig |
| ARHGDIB    | -0.305 | 11.803 | -1.856 | 0.064751867 | 0.10523063  | -4.871 | NoSig |
| C6orf123   | -0.282 | 6.798  | -1.851 | 0.065475371 | 0.106290259 | -4.880 | NoSig |
| FGF7       | -0.274 | 6.921  | -1.850 | 0.065631794 | 0.106363198 | -4.882 | NoSig |
| NAALAD2    | -0.423 | 3.919  | -1.850 | 0.065663359 | 0.106363198 | -4.882 | NoSig |
| STIM1      | -0.134 | 8.280  | -1.849 | 0.065772756 | 0.10642447  | -4.884 | NoSig |
| NR1H4      | 0.375  | 5.616  | 1.845  | 0.066324327 | 0.107097338 | -4.890 | NoSig |
| LRRK1      | -0.246 | 7.372  | -1.845 | 0.066332648 | 0.107097338 | -4.891 | NoSig |
| ZAP70      | -0.367 | 6.661  | -1.842 | 0.06685918  | 0.107830369 | -4.897 | NoSig |
| VPS8       | 0.147  | 8.594  | 1.840  | 0.067176435 | 0.108224657 | -4.901 | NoSig |
| MAOB       | 0.555  | 7.612  | 1.833  | 0.068204579 | 0.10976213  | -4.913 | NoSig |
| ERAP2      | -0.530 | 7.049  | -1.832 | 0.068359846 | 0.109893072 | -4.915 | NoSig |
| ETV4       | -0.325 | 5.746  | -1.830 | 0.068542702 | 0.109977656 | -4.917 | NoSig |
| MPHOSPH9   | -0.548 | 5.364  | -1.830 | 0.068560382 | 0.109977656 | -4.917 | NoSig |
| GNG12      | -0.244 | 9.599  | -1.828 | 0.068885588 | 0.110380248 | -4.921 | NoSig |
| ATF3       | 0.214  | 9.283  | 1.825  | 0.069307719 | 0.110827574 | -4.926 | NoSig |
| ABI3BP     | -0.374 | 5.652  | -1.825 | 0.069313816 | 0.110827574 | -4.926 | NoSig |
| CDHR1      | 0.272  | 3.389  | 1.824  | 0.06951332  | 0.111027183 | -4.929 | NoSig |
| SREK1      | 0.133  | 9.347  | 1.817  | 0.070614943 | 0.112665687 | -4.941 | NoSig |
| CXADR      | 0.398  | 10.313 | 1.809  | 0.071825035 | 0.114382542 | -4.955 | NoSig |
| GPRIN2     | 0.221  | 8.924  | 1.809  | 0.071844851 | 0.114382542 | -4.955 | NoSig |
| TATDN2     | 0.161  | 9.837  | 1.806  | 0.072319483 | 0.114935274 | -4.961 | NoSig |
| MUC4       | 0.353  | 5.493  | 1.806  | 0.072346615 | 0.114935274 | -4.961 | NoSig |

|          |        |        |        |             |             |        |       |
|----------|--------|--------|--------|-------------|-------------|--------|-------|
| C5orf28  | -0.248 | 7.673  | -1.800 | 0.073176596 | 0.116129773 | -4.970 | NoSig |
| PRR16    | -0.546 | 4.462  | -1.795 | 0.074022128 | 0.11734638  | -4.979 | NoSig |
| PAK1     | 0.361  | 6.208  | 1.788  | 0.075085292 | 0.118854831 | -4.991 | NoSig |
| RBM15    | -0.291 | 9.122  | -1.788 | 0.075133518 | 0.118854831 | -4.991 | NoSig |
| PPP1R11  | -0.184 | 11.130 | -1.786 | 0.075421966 | 0.119180894 | -4.994 | NoSig |
| CHRNA10  | -0.166 | 7.159  | -1.786 | 0.075499934 | 0.119180894 | -4.995 | NoSig |
| COBL     | 0.447  | 8.214  | 1.785  | 0.075679281 | 0.119337317 | -4.997 | NoSig |
| ITGB8    | -0.264 | 7.222  | -1.783 | 0.07600992  | 0.119731728 | -5.001 | NoSig |
| ATP6V1B1 | -0.382 | 6.758  | -1.779 | 0.076531507 | 0.120368794 | -5.006 | NoSig |
| B4GALNT1 | 0.284  | 7.481  | 1.779  | 0.076651978 | 0.120368794 | -5.007 | NoSig |
| TBC1D8B  | -0.198 | 8.083  | -1.779 | 0.076657194 | 0.120368794 | -5.008 | NoSig |
| CBR4     | -0.209 | 8.246  | -1.778 | 0.076760024 | 0.120403117 | -5.009 | NoSig |
| PTPRC    | 0.339  | 10.049 | 1.777  | 0.076884239 | 0.120470878 | -5.010 | NoSig |
| NT5C     | 0.265  | 7.395  | 1.776  | 0.077131759 | 0.120687994 | -5.013 | NoSig |
| ZNF638   | 0.185  | 10.599 | 1.776  | 0.077185126 | 0.120687994 | -5.013 | NoSig |
| PAK2     | -0.164 | 9.338  | -1.771 | 0.077888596 | 0.121660024 | -5.020 | NoSig |
| KCNK10   | 0.281  | 6.315  | 1.757  | 0.080378044 | 0.125416738 | -5.046 | NoSig |
| MPDU1    | 0.319  | 7.569  | 1.756  | 0.080514292 | 0.125497644 | -5.047 | NoSig |
| PAQR3    | -0.292 | 7.275  | -1.737 | 0.083763902 | 0.130317968 | -5.079 | NoSig |
| PBLD     | -0.189 | 7.176  | -1.737 | 0.083782096 | 0.130317968 | -5.079 | NoSig |
| USP49    | -0.355 | 4.324  | -1.724 | 0.086163369 | 0.133786858 | -5.101 | NoSig |
| MKS1     | -0.154 | 7.965  | -1.724 | 0.086192206 | 0.133786858 | -5.101 | NoSig |
| RNF170   | 0.263  | 7.026  | 1.721  | 0.086608341 | 0.1342926   | -5.105 | NoSig |
| DTWD1    | -0.377 | 6.694  | -1.720 | 0.086739641 | 0.13435609  | -5.106 | NoSig |
| FCN2     | -0.276 | 7.756  | -1.710 | 0.08874508  | 0.13731939  | -5.125 | NoSig |
| SPAG9    | 0.164  | 9.241  | 1.709  | 0.08884072  | 0.13732448  | -5.125 | NoSig |
| ARHGEF10 | 0.357  | 8.018  | 1.705  | 0.089657337 | 0.138442846 | -5.133 | NoSig |
| RANGAP1  | -0.158 | 8.821  | -1.701 | 0.090264697 | 0.139236104 | -5.138 | NoSig |
| MAD2L1   | 0.244  | 9.093  | 1.699  | 0.090739164 | 0.13982294  | -5.142 | NoSig |
| OTUB2    | 0.266  | 5.232  | 1.695  | 0.091433141 | 0.140746461 | -5.148 | NoSig |
| MAPKBP1  | -0.345 | 6.331  | -1.694 | 0.091730165 | 0.141057658 | -5.151 | NoSig |
| SLC2A11  | -0.332 | 6.013  | -1.684 | 0.093625234 | 0.143823061 | -5.167 | NoSig |
| ABI1     | -0.172 | 9.931  | -1.680 | 0.094300613 | 0.144711055 | -5.173 | NoSig |
| SEC23IP  | 0.139  | 8.671  | 1.675  | 0.095330802 | 0.146141136 | -5.181 | NoSig |
| GABRB2   | 0.343  | 6.939  | 1.674  | 0.095462335 | 0.146192061 | -5.182 | NoSig |
| ZDHHC18  | 0.229  | 8.802  | 1.674  | 0.095607184 | 0.146263254 | -5.184 | NoSig |
| CDH7     | 0.235  | 3.671  | 1.668  | 0.096642298 | 0.147694859 | -5.192 | NoSig |
| KRT7     | 0.370  | 10.825 | 1.663  | 0.097778418 | 0.149277729 | -5.201 | NoSig |
| PHTF2    | 0.167  | 8.759  | 1.659  | 0.098607044 | 0.150388384 | -5.208 | NoSig |
| RAC1     | 0.151  | 12.639 | 1.658  | 0.098818911 | 0.150557091 | -5.210 | NoSig |
| CCDC69   | -0.429 | 6.459  | -1.656 | 0.099068133 | 0.1506356   | -5.212 | NoSig |
| SYCE1L   | -0.495 | 6.098  | -1.656 | 0.099073044 | 0.1506356   | -5.212 | NoSig |
| TFAP2B   | -0.620 | 6.221  | -1.651 | 0.100138179 | 0.152099562 | -5.220 | NoSig |
| DDAH1    | 0.252  | 10.190 | 1.647  | 0.101013853 | 0.15327306  | -5.227 | NoSig |
| ELAVL3   | -0.208 | 4.808  | -1.646 | 0.101140447 | 0.153308711 | -5.228 | NoSig |

|          |        |        |        |             |             |        |       |
|----------|--------|--------|--------|-------------|-------------|--------|-------|
| GALE     | 0.171  | 7.990  | 1.640  | 0.102366821 | 0.155009637 | -5.237 | NoSig |
| SP140L   | -0.245 | 8.115  | -1.639 | 0.102719425 | 0.155357507 | -5.240 | NoSig |
| SVEP1    | -0.251 | 6.115  | -1.638 | 0.102805506 | 0.155357507 | -5.241 | NoSig |
| NUMA1    | 0.187  | 9.475  | 1.629  | 0.104639567 | 0.157968565 | -5.255 | NoSig |
| MCTP2    | 0.191  | 7.744  | 1.627  | 0.105158267 | 0.158487779 | -5.259 | NoSig |
| PPA2     | -0.143 | 10.254 | -1.627 | 0.105196663 | 0.158487779 | -5.259 | NoSig |
| GAD2     | 0.327  | 6.076  | 1.625  | 0.105602327 | 0.158937915 | -5.262 | NoSig |
| MCM9     | -0.159 | 8.358  | -1.622 | 0.106230345 | 0.159721459 | -5.266 | NoSig |
| FCGR2A   | -0.249 | 9.174  | -1.619 | 0.106877208 | 0.160531726 | -5.271 | NoSig |
| DOCK2    | 0.340  | 7.277  | 1.618  | 0.107037525 | 0.160610293 | -5.272 | NoSig |
| ZNF215   | 0.207  | 4.860  | 1.617  | 0.10739477  | 0.160983894 | -5.275 | NoSig |
| DDX31    | -0.253 | 6.128  | -1.610 | 0.108806726 | 0.162867417 | -5.285 | NoSig |
| GRK4     | 0.240  | 6.461  | 1.610  | 0.108870351 | 0.162867417 | -5.286 | NoSig |
| FXVD2    | -0.261 | 6.557  | -1.608 | 0.109202997 | 0.163200861 | -5.288 | NoSig |
| EPB41L4A | -0.259 | 5.585  | -1.607 | 0.109509528 | 0.163494647 | -5.290 | NoSig |
| TRPV5    | 0.263  | 7.042  | 1.601  | 0.110773367 | 0.164965412 | -5.299 | NoSig |
| CD44     | -0.227 | 11.948 | -1.601 | 0.110791373 | 0.164965412 | -5.299 | NoSig |
| PHF20L1  | 0.151  | 8.445  | 1.601  | 0.110827469 | 0.164965412 | -5.300 | NoSig |
| GPR12    | 0.245  | 8.307  | 1.598  | 0.111467192 | 0.165751714 | -5.304 | NoSig |
| CDH4     | 0.295  | 7.494  | 1.597  | 0.111704514 | 0.165938673 | -5.306 | NoSig |
| HLA.DOB  | 0.379  | 6.962  | 1.595  | 0.112197382 | 0.166504498 | -5.309 | NoSig |
| NOL3     | 0.228  | 8.350  | 1.592  | 0.112719929 | 0.167113195 | -5.313 | NoSig |
| UEVLD    | -0.199 | 7.518  | -1.591 | 0.113092172 | 0.167498068 | -5.315 | NoSig |
| C18orf25 | -0.170 | 7.893  | -1.589 | 0.113569797 | 0.168038097 | -5.319 | NoSig |
| GRIK5    | 0.342  | 8.226  | 1.584  | 0.1145685   | 0.169347275 | -5.325 | NoSig |
| RGS7     | -0.274 | 5.962  | -1.582 | 0.114990523 | 0.169802292 | -5.328 | NoSig |
| KCNE4    | -0.376 | 5.649  | -1.577 | 0.116187412 | 0.171399485 | -5.336 | NoSig |
| CNTLN    | -0.297 | 6.353  | -1.565 | 0.11893613  | 0.175280501 | -5.354 | NoSig |
| SOS1     | 0.195  | 8.568  | 1.564  | 0.119133545 | 0.175397605 | -5.356 | NoSig |
| PGM5     | -0.260 | 4.632  | -1.564 | 0.119348958 | 0.175540949 | -5.357 | NoSig |
| KIFC3    | 0.189  | 7.749  | 1.562  | 0.119663487 | 0.175829649 | -5.359 | NoSig |
| PDZK1IP1 | -0.291 | 9.814  | -1.562 | 0.119825107 | 0.17589332  | -5.360 | NoSig |
| WBSCR16  | 0.127  | 8.978  | 1.560  | 0.120087358 | 0.17610444  | -5.362 | NoSig |
| GABRB1   | 0.279  | 6.441  | 1.560  | 0.120250159 | 0.176169445 | -5.363 | NoSig |
| HEMK1    | 0.130  | 8.106  | 1.556  | 0.12104609  | 0.17716096  | -5.368 | NoSig |
| CLEC2B   | 0.272  | 9.262  | 1.554  | 0.121546139 | 0.177717905 | -5.371 | NoSig |
| TLE6     | -0.187 | 6.729  | -1.553 | 0.121835178 | 0.17796553  | -5.373 | NoSig |
| GPR126   | -0.226 | 8.151  | -1.548 | 0.123031964 | 0.179537322 | -5.380 | NoSig |
| STX6     | -0.113 | 9.943  | -1.547 | 0.123367238 | 0.179741069 | -5.383 | NoSig |
| HMGA2    | -0.277 | 7.158  | -1.546 | 0.123413337 | 0.179741069 | -5.383 | NoSig |
| LYST     | 0.181  | 9.273  | 1.545  | 0.123764219 | 0.180075727 | -5.385 | NoSig |
| CP       | -0.371 | 8.926  | -1.541 | 0.124721602 | 0.181291321 | -5.391 | NoSig |
| DET1     | -0.113 | 8.252  | -1.538 | 0.125492787 | 0.182234154 | -5.396 | NoSig |
| SPOCK3   | -0.343 | 4.891  | -1.536 | 0.125866037 | 0.182597851 | -5.398 | NoSig |
| VNN1     | -0.382 | 5.882  | -1.531 | 0.127267192 | 0.184450599 | -5.407 | NoSig |

|          |        |        |        |             |             |        |       |
|----------|--------|--------|--------|-------------|-------------|--------|-------|
| SNAP25   | 0.376  | 7.813  | 1.529  | 0.127766714 | 0.184994259 | -5.410 | NoSig |
| CASS4    | -0.287 | 4.556  | -1.521 | 0.129714583 | 0.187631893 | -5.421 | NoSig |
| C16orf45 | -0.234 | 7.277  | -1.519 | 0.130208484 | 0.18816328  | -5.424 | NoSig |
| SLC17A1  | 0.340  | 7.000  | 1.511  | 0.132273595 | 0.190958485 | -5.436 | NoSig |
| SYNJ2    | 0.151  | 8.770  | 1.510  | 0.132399595 | 0.190958485 | -5.437 | NoSig |
| RRP12    | -0.207 | 7.271  | -1.509 | 0.132660086 | 0.191148786 | -5.438 | NoSig |
| RUNX1T1  | -0.150 | 8.685  | -1.502 | 0.13455334  | 0.193563095 | -5.449 | NoSig |
| CA6      | 0.340  | 6.813  | 1.502  | 0.134595992 | 0.193563095 | -5.449 | NoSig |
| HBB      | 0.844  | 13.381 | 1.499  | 0.135236106 | 0.194295739 | -5.453 | NoSig |
| CCL5     | -0.257 | 10.034 | -1.498 | 0.13556008  | 0.194573204 | -5.455 | NoSig |
| AMMECR1  | 0.165  | 8.635  | 1.493  | 0.136839588 | 0.196220316 | -5.462 | NoSig |
| BRWD1    | -0.303 | 7.141  | -1.485 | 0.1389359   | 0.198867426 | -5.474 | NoSig |
| HEATR1   | 0.122  | 10.298 | 1.485  | 0.138953097 | 0.198867426 | -5.474 | NoSig |
| RECK     | 0.356  | 11.320 | 1.484  | 0.139222015 | 0.199060708 | -5.475 | NoSig |
| SPP1     | -0.315 | 12.502 | -1.484 | 0.139357632 | 0.199063207 | -5.476 | NoSig |
| TRPM3    | 0.271  | 7.827  | 1.479  | 0.140536263 | 0.200554149 | -5.482 | NoSig |
| DIXDC1   | -0.296 | 6.543  | -1.478 | 0.140915259 | 0.200902196 | -5.484 | NoSig |
| SCAMP1   | 0.135  | 10.016 | 1.476  | 0.141379682 | 0.201371253 | -5.487 | NoSig |
| SRCAP    | 0.178  | 7.925  | 1.466  | 0.144165233 | 0.205142298 | -5.502 | NoSig |
| LPGAT1   | -0.182 | 9.560  | -1.465 | 0.144466433 | 0.205374365 | -5.503 | NoSig |
| SLC25A28 | 0.203  | 8.555  | 1.463  | 0.144939288 | 0.20567218  | -5.506 | NoSig |
| DST      | -0.230 | 9.300  | -1.463 | 0.144952552 | 0.20567218  | -5.506 | NoSig |
| DZANK1   | -0.281 | 6.884  | -1.461 | 0.145315304 | 0.205990331 | -5.508 | NoSig |
| PRPSAP1  | 0.129  | 10.140 | 1.460  | 0.145811323 | 0.206496607 | -5.510 | NoSig |
| CUX2     | -0.274 | 5.424  | -1.458 | 0.146142506 | 0.206768703 | -5.512 | NoSig |
| PEX14    | -0.238 | 8.174  | -1.456 | 0.14683508  | 0.207551107 | -5.515 | NoSig |
| CA8      | 0.310  | 6.706  | 1.453  | 0.147562276 | 0.208380915 | -5.519 | NoSig |
| KIF5C    | -0.182 | 8.274  | -1.450 | 0.148490047 | 0.209492126 | -5.524 | NoSig |
| ARHGEF7  | 0.113  | 9.818  | 1.447  | 0.149393516 | 0.210566975 | -5.528 | NoSig |
| TMEM80   | -0.177 | 7.546  | -1.442 | 0.150738644 | 0.212261708 | -5.535 | NoSig |
| ATP9B    | 0.183  | 7.546  | 1.440  | 0.151396515 | 0.212986393 | -5.538 | NoSig |
| SV2C     | 0.272  | 6.278  | 1.437  | 0.152118004 | 0.213799123 | -5.542 | NoSig |
| TRMT2B   | 0.202  | 8.834  | 1.430  | 0.153992347 | 0.216229103 | -5.551 | NoSig |
| CDK12    | -0.156 | 8.033  | -1.429 | 0.154495097 | 0.216664789 | -5.554 | NoSig |
| WWC1     | 0.138  | 9.228  | 1.428  | 0.154594043 | 0.216664789 | -5.554 | NoSig |
| ZFYVE16  | -0.283 | 7.803  | -1.420 | 0.156890279 | 0.219675936 | -5.565 | NoSig |
| CARD14   | 0.174  | 7.811  | 1.415  | 0.158527712 | 0.221759838 | -5.573 | NoSig |
| TTC23    | -0.125 | 8.261  | -1.413 | 0.159075553 | 0.222317056 | -5.575 | NoSig |
| WNT4     | -0.316 | 5.260  | -1.408 | 0.160456712 | 0.224036742 | -5.582 | NoSig |
| CACNG5   | -0.256 | 5.517  | -1.397 | 0.163774089 | 0.2284541   | -5.597 | NoSig |
| GPR97    | 0.297  | 7.486  | 1.393  | 0.164906606 | 0.229818297 | -5.602 | NoSig |
| RUVBL2   | -0.259 | 9.996  | -1.389 | 0.166169733 | 0.231361791 | -5.608 | NoSig |
| SAMSN1   | -0.235 | 8.064  | -1.388 | 0.166618271 | 0.231769288 | -5.610 | NoSig |
| DPP6     | 0.248  | 6.916  | 1.375  | 0.170438178 | 0.236861281 | -5.627 | NoSig |
| ABCA8    | -0.292 | 5.675  | -1.371 | 0.171656614 | 0.238331825 | -5.632 | NoSig |



|         |        |        |        |             |             |        |       |
|---------|--------|--------|--------|-------------|-------------|--------|-------|
| IQSEC3  | -0.216 | 5.541  | -1.364 | 0.173851395 | 0.241153941 | -5.641 | NoSig |
| KCNK15  | 0.314  | 4.270  | 1.352  | 0.177640668 | 0.246180497 | -5.657 | NoSig |
| ITGB2   | -0.193 | 10.455 | -1.349 | 0.178573932 | 0.247243423 | -5.661 | NoSig |
| ESRRA   | 0.099  | 9.105  | 1.349  | 0.17877919  | 0.247297354 | -5.662 | NoSig |
| CCDC82  | -0.204 | 6.679  | -1.348 | 0.179175183 | 0.247614774 | -5.664 | NoSig |
| ADAM22  | 0.262  | 7.566  | 1.342  | 0.181084255 | 0.250020694 | -5.671 | NoSig |
| DHX35   | 0.244  | 6.646  | 1.340  | 0.181495918 | 0.250244811 | -5.673 | NoSig |
| FCHSD2  | 0.254  | 8.012  | 1.340  | 0.181583154 | 0.250244811 | -5.673 | NoSig |
| HDGFRP3 | 0.166  | 8.339  | 1.339  | 0.18189057  | 0.250414576 | -5.675 | NoSig |
| KCNQ3   | -0.161 | 7.317  | -1.339 | 0.182104769 | 0.250414576 | -5.675 | NoSig |
| PAX7    | -0.200 | 4.530  | -1.338 | 0.182211548 | 0.250414576 | -5.676 | NoSig |
| AKT2    | 0.233  | 7.126  | 1.337  | 0.182726967 | 0.250891044 | -5.678 | NoSig |
| IL16    | 0.174  | 8.871  | 1.335  | 0.183323645 | 0.2514781   | -5.680 | NoSig |
| FYCO1   | -0.131 | 7.937  | -1.334 | 0.183576494 | 0.251592855 | -5.681 | NoSig |
| TNK2    | 0.199  | 8.174  | 1.331  | 0.18469743  | 0.252896021 | -5.686 | NoSig |
| TMCC2   | 0.228  | 7.234  | 1.329  | 0.185280734 | 0.253461317 | -5.688 | NoSig |
| CDCP1   | 0.184  | 8.837  | 1.326  | 0.186041818 | 0.254268551 | -5.691 | NoSig |
| PDE6B   | -0.243 | 4.798  | -1.324 | 0.186826325 | 0.255106286 | -5.694 | NoSig |
| STAT5B  | 0.137  | 9.003  | 1.319  | 0.188415049 | 0.257039613 | -5.700 | NoSig |
| ABCC4   | -0.248 | 7.052  | -1.317 | 0.189133846 | 0.257783711 | -5.703 | NoSig |
| BBS9    | 0.139  | 7.062  | 1.315  | 0.189746048 | 0.258381295 | -5.705 | NoSig |
| TRMT61A | -0.155 | 8.272  | -1.312 | 0.190896789 | 0.259710454 | -5.710 | NoSig |
| AKR1C1  | 0.334  | 9.630  | 1.311  | 0.191092649 | 0.259739277 | -5.711 | NoSig |
| NRXN1   | 0.300  | 5.971  | 1.309  | 0.191770884 | 0.260423109 | -5.713 | NoSig |
| ZNF12   | -0.203 | 8.696  | -1.305 | 0.193144603 | 0.262049293 | -5.718 | NoSig |
| ATP10A  | 0.136  | 7.654  | 1.299  | 0.195370219 | 0.264827271 | -5.727 | NoSig |
| EYA4    | 0.275  | 5.994  | 1.297  | 0.195812939 | 0.265185647 | -5.728 | NoSig |
| LAMA3   | -0.308 | 6.285  | -1.296 | 0.196360995 | 0.265685896 | -5.730 | NoSig |
| CTNNA3  | 0.234  | 4.930  | 1.295  | 0.196760127 | 0.265968408 | -5.732 | NoSig |
| ASAH1   | -0.164 | 12.058 | -1.294 | 0.196927517 | 0.265968408 | -5.732 | NoSig |
| SNRK    | 0.126  | 9.420  | 1.291  | 0.198029223 | 0.267213661 | -5.736 | NoSig |
| DENND1B | 0.133  | 8.361  | 1.289  | 0.198677737 | 0.26784569  | -5.739 | NoSig |
| DLGAP4  | 0.098  | 8.021  | 1.286  | 0.199810489 | 0.268972102 | -5.743 | NoSig |
| PELO    | -0.146 | 8.777  | -1.286 | 0.199875032 | 0.268972102 | -5.743 | NoSig |
| NAA15   | 0.133  | 8.521  | 1.284  | 0.200603059 | 0.26970773  | -5.746 | NoSig |
| HILPDA  | -0.135 | 10.325 | -1.267 | 0.206311618 | 0.27704523  | -5.766 | NoSig |
| GPR125  | 0.152  | 8.793  | 1.267  | 0.206613818 | 0.27704523  | -5.767 | NoSig |
| CYP11B1 | 0.211  | 7.259  | 1.267  | 0.206619476 | 0.27704523  | -5.767 | NoSig |
| HRH3    | -0.158 | 5.419  | -1.266 | 0.206890468 | 0.277158673 | -5.768 | NoSig |
| RECQL4  | -0.324 | 6.729  | -1.262 | 0.208201916 | 0.278664491 | -5.772 | NoSig |
| TYR     | 0.278  | 6.686  | 1.261  | 0.208616939 | 0.278934159 | -5.774 | NoSig |
| MITF    | 0.124  | 7.837  | 1.261  | 0.20877856  | 0.278934159 | -5.774 | NoSig |
| CD79A   | 0.204  | 8.347  | 1.260  | 0.209123517 | 0.279144228 | -5.776 | NoSig |
| STAB1   | 0.135  | 9.531  | 1.258  | 0.209705439 | 0.279669944 | -5.778 | NoSig |
| SLC1A2  | 0.194  | 7.331  | 1.257  | 0.210181608 | 0.28005381  | -5.779 | NoSig |

|          |        |        |        |             |             |        |       |
|----------|--------|--------|--------|-------------|-------------|--------|-------|
| PRKCA    | 0.177  | 7.911  | 1.256  | 0.210427543 | 0.280130489 | -5.780 | NoSig |
| ATF6B    | -0.115 | 8.682  | -1.255 | 0.21068802  | 0.280226374 | -5.781 | NoSig |
| BEST1    | -0.192 | 6.818  | -1.254 | 0.211036299 | 0.280438764 | -5.782 | NoSig |
| EFNA2    | 0.201  | 5.183  | 1.253  | 0.211647784 | 0.281000227 | -5.784 | NoSig |
| ZMAT3    | -0.130 | 8.005  | -1.250 | 0.212600353 | 0.282013136 | -5.787 | NoSig |
| SIM1     | -0.258 | 5.979  | -1.248 | 0.213171264 | 0.282518421 | -5.789 | NoSig |
| PLD1     | 0.113  | 8.456  | 1.245  | 0.2143329   | 0.283805006 | -5.793 | NoSig |
| ZDHHHC14 | -0.227 | 6.243  | -1.243 | 0.215180653 | 0.284674049 | -5.796 | NoSig |
| LTBR     | 0.117  | 9.218  | 1.236  | 0.217942237 | 0.288071205 | -5.805 | NoSig |
| RPP30    | 0.105  | 9.336  | 1.233  | 0.218802595 | 0.288951562 | -5.808 | NoSig |
| NLGN4X   | -0.309 | 5.254  | -1.232 | 0.21912034  | 0.289114415 | -5.809 | NoSig |
| ENTPD3   | 0.212  | 7.310  | 1.224  | 0.222398774 | 0.293179945 | -5.819 | NoSig |
| PCDH9    | 0.229  | 6.125  | 1.219  | 0.223970367 | 0.294990199 | -5.824 | NoSig |
| TRIOBP   | -0.114 | 10.058 | -1.216 | 0.225206392 | 0.296326377 | -5.828 | NoSig |
| POLR3B   | 0.108  | 8.805  | 1.216  | 0.225383412 | 0.296326377 | -5.829 | NoSig |
| WDR60    | -0.263 | 5.861  | -1.213 | 0.226462136 | 0.297481622 | -5.832 | NoSig |
| GOSR1    | 0.098  | 9.473  | 1.209  | 0.228059643 | 0.299315701 | -5.837 | NoSig |
| CEPT1    | -0.122 | 8.858  | -1.199 | 0.231621864 | 0.303548679 | -5.848 | NoSig |
| DUOX1    | 0.218  | 6.652  | 1.199  | 0.231693175 | 0.303548679 | -5.848 | NoSig |
| PCNP     | -0.143 | 10.944 | -1.195 | 0.233333006 | 0.305427975 | -5.853 | NoSig |
| PIKFYVE  | -0.195 | 7.932  | -1.189 | 0.235868918 | 0.308475885 | -5.861 | NoSig |
| C2orf72  | -0.180 | 7.060  | -1.185 | 0.237231297 | 0.309652002 | -5.865 | NoSig |
| VIL1     | -0.233 | 5.337  | -1.185 | 0.23733614  | 0.309652002 | -5.865 | NoSig |
| ZNF160   | -0.182 | 10.705 | -1.185 | 0.237392927 | 0.309652002 | -5.865 | NoSig |
| MBD1     | 0.154  | 9.255  | 1.182  | 0.23828302  | 0.310540623 | -5.868 | NoSig |
| ZFC3H1   | 0.067  | 9.350  | 1.178  | 0.239978126 | 0.312475895 | -5.873 | NoSig |
| SMPDL3A  | 0.152  | 8.001  | 1.171  | 0.242780567 | 0.315848384 | -5.881 | NoSig |
| PTGS2    | -0.276 | 6.092  | -1.170 | 0.243443722 | 0.316434279 | -5.883 | NoSig |
| TAT      | -0.249 | 6.860  | -1.166 | 0.244848745 | 0.317982606 | -5.887 | NoSig |
| MACROD1  | -0.181 | 8.328  | -1.157 | 0.248523067 | 0.322472776 | -5.897 | NoSig |
| ANKRD28  | -0.131 | 8.618  | -1.152 | 0.250695887 | 0.32500853  | -5.903 | NoSig |
| MYO1D    | 0.303  | 6.177  | 1.138  | 0.25640885  | 0.33191112  | -5.918 | NoSig |
| FAM208B  | 0.136  | 9.845  | 1.138  | 0.256466629 | 0.33191112  | -5.918 | NoSig |
| PTPRM    | -0.219 | 8.398  | -1.136 | 0.25702741  | 0.332347616 | -5.920 | NoSig |
| PARVA    | 0.087  | 8.450  | 1.135  | 0.257523208 | 0.332699401 | -5.921 | NoSig |
| RASAL2   | -0.256 | 6.441  | -1.118 | 0.264740424 | 0.341726571 | -5.940 | NoSig |
| SIK2     | -0.155 | 7.803  | -1.104 | 0.270825403 | 0.349277862 | -5.956 | NoSig |
| NDST1    | -0.122 | 8.332  | -1.103 | 0.271138024 | 0.349378026 | -5.956 | NoSig |
| RAPGEF5  | -0.110 | 8.462  | -1.099 | 0.27284729  | 0.351276122 | -5.961 | NoSig |
| PTK6     | -0.304 | 5.192  | -1.092 | 0.276124629 | 0.355001704 | -5.969 | NoSig |
| TTLL12   | -0.086 | 10.150 | -1.092 | 0.276218541 | 0.355001704 | -5.969 | NoSig |
| SERPINE1 | 0.204  | 5.943  | 1.089  | 0.277483394 | 0.356159206 | -5.972 | NoSig |
| ABCD3    | -0.151 | 9.875  | -1.088 | 0.277598197 | 0.356159206 | -5.972 | NoSig |
| GOLGA7   | -0.089 | 10.999 | -1.084 | 0.279623689 | 0.358448643 | -5.977 | NoSig |
| RSRC1    | -0.106 | 8.895  | -1.083 | 0.279909719 | 0.358506246 | -5.978 | NoSig |

|          |        |        |        |             |             |        |       |
|----------|--------|--------|--------|-------------|-------------|--------|-------|
| RCBTB1   | -0.112 | 7.511  | -1.082 | 0.280600312 | 0.359081466 | -5.979 | NoSig |
| DPYD     | 0.149  | 7.640  | 1.080  | 0.281292337 | 0.359657528 | -5.981 | NoSig |
| COL1A1   | 0.351  | 11.520 | 1.073  | 0.284468712 | 0.363406335 | -5.989 | NoSig |
| RAG1     | -0.205 | 5.029  | -1.069 | 0.286276133 | 0.365401381 | -5.993 | NoSig |
| DNAJC13  | -0.151 | 8.800  | -1.068 | 0.286750292 | 0.365692697 | -5.994 | NoSig |
| MFAP3    | 0.123  | 8.431  | 1.066  | 0.287770561 | 0.366679369 | -5.996 | NoSig |
| INPP5B   | 0.181  | 6.879  | 1.063  | 0.288976623 | 0.367900889 | -5.999 | NoSig |
| SYNCRIP  | -0.100 | 11.540 | -1.058 | 0.291144195 | 0.370251801 | -6.004 | NoSig |
| NID1     | 0.127  | 7.675  | 1.058  | 0.291321188 | 0.370251801 | -6.004 | NoSig |
| TBX5     | 0.189  | 6.911  | 1.056  | 0.291971346 | 0.370573082 | -6.006 | NoSig |
| CAMTA1   | -0.339 | 5.674  | -1.056 | 0.292072395 | 0.370573082 | -6.006 | NoSig |
| C16orf62 | 0.114  | 7.944  | 1.044  | 0.297552094 | 0.376887683 | -6.018 | NoSig |
| PAAF1    | -0.193 | 7.858  | -1.044 | 0.297556247 | 0.376887683 | -6.018 | NoSig |
| IL11RA   | -0.127 | 7.621  | -1.042 | 0.298725596 | 0.378046775 | -6.021 | NoSig |
| DSG2     | -0.194 | 10.797 | -1.038 | 0.300587688 | 0.38007984  | -6.025 | NoSig |
| ITGB1    | -0.131 | 12.693 | -1.037 | 0.300847985 | 0.380085772 | -6.026 | NoSig |
| EDN1     | 0.250  | 7.281  | 1.034  | 0.30212489  | 0.381374967 | -6.028 | NoSig |
| PHKA2    | -0.136 | 8.498  | -1.032 | 0.30327138  | 0.382497491 | -6.031 | NoSig |
| FGF4     | 0.233  | 8.047  | 1.024  | 0.307112897 | 0.387014303 | -6.039 | NoSig |
| CCND3    | 0.109  | 9.981  | 1.023  | 0.307610666 | 0.387313345 | -6.040 | NoSig |
| RGS13    | -0.245 | 5.501  | -1.014 | 0.311729281 | 0.39216704  | -6.049 | NoSig |
| LLGL2    | -0.101 | 8.857  | -1.010 | 0.313807776 | 0.394448151 | -6.053 | NoSig |
| FANCC    | 0.111  | 9.074  | 1.006  | 0.315431592 | 0.396154373 | -6.057 | NoSig |
| SLC39A6  | 0.146  | 11.131 | 1.005  | 0.316144106 | 0.396714165 | -6.058 | NoSig |
| C11orf63 | 0.166  | 6.153  | 1.002  | 0.317642955 | 0.398258915 | -6.061 | NoSig |
| ABCB9    | 0.194  | 6.370  | 0.998  | 0.31918757  | 0.399858396 | -6.064 | NoSig |
| RNF216   | 0.089  | 8.468  | 0.997  | 0.320084889 | 0.400644975 | -6.066 | NoSig |
| FARP2    | -0.110 | 7.798  | -0.996 | 0.320430171 | 0.400739836 | -6.067 | NoSig |
| FBXL14   | 0.119  | 8.717  | 0.993  | 0.321569108 | 0.401826272 | -6.069 | NoSig |
| TAF2     | 0.107  | 9.922  | 0.992  | 0.322475124 | 0.402620075 | -6.071 | NoSig |
| SETMAR   | -0.139 | 7.765  | -0.984 | 0.326204895 | 0.406794484 | -6.078 | NoSig |
| NADSYN1  | -0.194 | 7.150  | -0.983 | 0.326537703 | 0.406794484 | -6.079 | NoSig |
| TERT     | -0.157 | 5.569  | -0.983 | 0.326639283 | 0.406794484 | -6.079 | NoSig |
| VHL      | 0.314  | 6.175  | 0.981  | 0.327799384 | 0.407897643 | -6.081 | NoSig |
| CD96     | 0.139  | 6.886  | 0.980  | 0.328285064 | 0.408160443 | -6.082 | NoSig |
| BAGE     | -0.206 | 5.857  | -0.977 | 0.329841692 | 0.409457214 | -6.085 | NoSig |
| GTPBP3   | 0.089  | 9.653  | 0.977  | 0.329878777 | 0.409457214 | -6.085 | NoSig |
| TET3     | -0.137 | 6.941  | -0.975 | 0.330426177 | 0.4097946   | -6.086 | NoSig |
| RIMS1    | -0.200 | 6.192  | -0.972 | 0.331974394 | 0.411371603 | -6.089 | NoSig |
| SMEK2    | 0.131  | 6.385  | 0.967  | 0.334475632 | 0.413975202 | -6.094 | NoSig |
| EXD3     | 0.127  | 7.857  | 0.966  | 0.334884921 | 0.413975202 | -6.095 | NoSig |
| KLHL29   | -0.211 | 5.140  | -0.966 | 0.334910671 | 0.413975202 | -6.095 | NoSig |
| ITGBL1   | -0.157 | 7.733  | -0.961 | 0.337538373 | 0.416876712 | -6.100 | NoSig |
| PARK2    | -0.164 | 6.444  | -0.958 | 0.339153615 | 0.418524005 | -6.103 | NoSig |
| MFI2     | -0.202 | 6.007  | -0.957 | 0.339820193 | 0.418998861 | -6.104 | NoSig |

|         |        |        |        |             |             |        |       |
|---------|--------|--------|--------|-------------|-------------|--------|-------|
| POSTN   | 0.284  | 10.900 | 0.954  | 0.341172256 | 0.420317435 | -6.107 | NoSig |
| MYLK3   | -0.186 | 4.910  | -0.949 | 0.343898321 | 0.423325168 | -6.112 | NoSig |
| GAMT    | -0.230 | 5.642  | -0.937 | 0.349724118 | 0.430140417 | -6.122 | NoSig |
| ZNF428  | -0.201 | 5.515  | -0.936 | 0.35015936  | 0.430319809 | -6.123 | NoSig |
| RHEB    | 0.099  | 12.090 | 0.934  | 0.351090759 | 0.431108141 | -6.125 | NoSig |
| YIF1B   | -0.085 | 7.803  | -0.930 | 0.35356805  | 0.433791824 | -6.129 | NoSig |
| WFDC8   | -0.138 | 6.397  | -0.928 | 0.354569354 | 0.43466169  | -6.131 | NoSig |
| TMEM53  | -0.097 | 8.178  | -0.924 | 0.356477585 | 0.436640996 | -6.134 | NoSig |
| SDC3    | -0.165 | 8.324  | -0.923 | 0.357054385 | 0.436987548 | -6.135 | NoSig |
| TAL1    | 0.149  | 6.864  | 0.917  | 0.360111399 | 0.440366489 | -6.141 | NoSig |
| DBF4B   | 0.141  | 6.663  | 0.914  | 0.361918623 | 0.442212812 | -6.144 | NoSig |
| MOSPD1  | -0.076 | 8.952  | -0.910 | 0.363625434 | 0.443933514 | -6.147 | NoSig |
| KLK2    | 0.149  | 5.925  | 0.909  | 0.364186905 | 0.444254248 | -6.148 | NoSig |
| CBFA2T2 | 0.111  | 8.428  | 0.904  | 0.36699333  | 0.447310723 | -6.152 | NoSig |
| DMWD    | -0.085 | 10.018 | -0.901 | 0.368314521 | 0.448553392 | -6.154 | NoSig |
| FUS     | 0.070  | 10.732 | 0.897  | 0.370817548 | 0.451201803 | -6.159 | NoSig |
| SAE1    | -0.064 | 10.385 | -0.896 | 0.371096036 | 0.451201803 | -6.159 | NoSig |
| SSBP2   | -0.092 | 7.956  | -0.891 | 0.374054628 | 0.454427477 | -6.164 | NoSig |
| PGC     | 0.170  | 7.362  | 0.889  | 0.374766241 | 0.454799375 | -6.165 | NoSig |
| S100B   | 0.271  | 5.565  | 0.889  | 0.37516395  | 0.454799375 | -6.166 | NoSig |
| UBE2W   | 0.072  | 8.237  | 0.888  | 0.3752783   | 0.454799375 | -6.166 | NoSig |
| PACSIN2 | -0.095 | 10.795 | -0.888 | 0.375584524 | 0.454799827 | -6.166 | NoSig |
| DPY19L1 | -0.140 | 7.600  | -0.885 | 0.376867775 | 0.45598241  | -6.168 | NoSig |
| ZBTB38  | -0.102 | 9.537  | -0.884 | 0.377672278 | 0.456584291 | -6.170 | NoSig |
| HNMT    | 0.131  | 8.630  | 0.883  | 0.378257814 | 0.456763788 | -6.171 | NoSig |
| FILIP1L | -0.147 | 8.369  | -0.883 | 0.378435095 | 0.456763788 | -6.171 | NoSig |
| KLHDC4  | 0.100  | 8.357  | 0.882  | 0.378817754 | 0.456854825 | -6.172 | NoSig |
| CENPI   | -0.118 | 6.643  | -0.879 | 0.38058107  | 0.458609442 | -6.174 | NoSig |
| GUCA1A  | 0.162  | 6.741  | 0.877  | 0.381257513 | 0.459052568 | -6.176 | NoSig |
| PIGQ    | -0.085 | 7.534  | -0.867 | 0.387023803 | 0.465345532 | -6.185 | NoSig |
| DAAM1   | -0.142 | 8.664  | -0.867 | 0.387109901 | 0.465345532 | -6.185 | NoSig |
| NR5A2   | -0.147 | 6.356  | -0.854 | 0.394074224 | 0.47333471  | -6.195 | NoSig |
| PLCE1   | 0.147  | 6.414  | 0.850  | 0.396426876 | 0.475776242 | -6.199 | NoSig |
| ZFHX4   | -0.110 | 7.989  | -0.849 | 0.396761473 | 0.475793799 | -6.199 | NoSig |
| FRY     | 0.152  | 7.077  | 0.848  | 0.397327615 | 0.47608877  | -6.200 | NoSig |
| RNF130  | 0.082  | 10.293 | 0.845  | 0.398913456 | 0.477604113 | -6.203 | NoSig |
| BANK1   | -0.229 | 6.118  | -0.844 | 0.399412343 | 0.477816697 | -6.203 | NoSig |
| ADAMTS5 | 0.109  | 7.861  | 0.838  | 0.40287124  | 0.481567149 | -6.209 | NoSig |
| RBBP6   | 0.069  | 9.693  | 0.836  | 0.404060451 | 0.48222607  | -6.210 | NoSig |
| NEUROD1 | 0.164  | 4.745  | 0.836  | 0.404071071 | 0.48222607  | -6.210 | NoSig |
| HERC6   | 0.153  | 8.580  | 0.834  | 0.405249407 | 0.482877966 | -6.212 | NoSig |
| MS4A3   | -0.169 | 5.161  | -0.834 | 0.405266779 | 0.482877966 | -6.212 | NoSig |
| ZMYND11 | -0.087 | 11.388 | -0.827 | 0.40929782  | 0.48728073  | -6.218 | NoSig |
| GSTO1   | 0.062  | 11.578 | 0.826  | 0.409617291 | 0.48728073  | -6.218 | NoSig |
| MAPK12  | -0.120 | 7.214  | -0.821 | 0.412640666 | 0.490484948 | -6.223 | NoSig |

|         |        |        |        |             |             |        |       |
|---------|--------|--------|--------|-------------|-------------|--------|-------|
| PTBP2   | -0.095 | 8.241  | -0.818 | 0.414285641 | 0.491686407 | -6.225 | NoSig |
| CYP17A1 | -0.142 | 7.477  | -0.818 | 0.414312756 | 0.491686407 | -6.225 | NoSig |
| SMPDL3B | -0.216 | 4.873  | -0.809 | 0.419467093 | 0.497174211 | -6.232 | NoSig |
| LRRC16A | -0.076 | 8.743  | -0.808 | 0.41970882  | 0.497174211 | -6.233 | NoSig |
| RNF141  | -0.101 | 7.946  | -0.808 | 0.41994002  | 0.497174211 | -6.233 | NoSig |
| KIF26B  | -0.190 | 4.584  | -0.807 | 0.420773097 | 0.497764196 | -6.234 | NoSig |
| SAMD14  | 0.115  | 6.050  | 0.797  | 0.426311033 | 0.503914551 | -6.242 | NoSig |
| RHOF    | 0.089  | 8.370  | 0.793  | 0.42837537  | 0.505952482 | -6.244 | NoSig |
| GINS2   | 0.190  | 8.198  | 0.792  | 0.429035153 | 0.506329581 | -6.245 | NoSig |
| TRAM2   | -0.079 | 9.091  | -0.788 | 0.431673704 | 0.50903949  | -6.249 | NoSig |
| SLC4A4  | 0.181  | 8.677  | 0.787  | 0.432118567 | 0.509160308 | -6.249 | NoSig |
| TFE3    | 0.110  | 8.516  | 0.785  | 0.433396407 | 0.510261645 | -6.251 | NoSig |
| PAX8    | 0.133  | 10.387 | 0.780  | 0.436504826 | 0.513514776 | -6.255 | NoSig |
| PAX1    | 0.152  | 7.180  | 0.778  | 0.437662994 | 0.514470254 | -6.257 | NoSig |
| PIK3IP1 | 0.112  | 8.660  | 0.774  | 0.439638497 | 0.516384238 | -6.259 | NoSig |
| ITPKB   | 0.147  | 8.139  | 0.772  | 0.440877501 | 0.517430816 | -6.261 | NoSig |
| TAF11   | -0.072 | 9.263  | -0.770 | 0.44199886  | 0.518337779 | -6.262 | NoSig |
| CNOT1   | 0.080  | 10.918 | 0.769  | 0.442693738 | 0.518743568 | -6.263 | NoSig |
| MCTP1   | 0.152  | 6.378  | 0.764  | 0.445646251 | 0.521792106 | -6.267 | NoSig |
| CYTH4   | 0.098  | 8.429  | 0.759  | 0.448657097 | 0.524904094 | -6.271 | NoSig |
| MYT1L   | -0.141 | 5.586  | -0.757 | 0.44994249  | 0.525994091 | -6.272 | NoSig |
| TRPV6   | -0.177 | 5.798  | -0.755 | 0.4510668   | 0.526894212 | -6.274 | NoSig |
| COQ10B  | 0.120  | 9.485  | 0.754  | 0.451624162 | 0.527131185 | -6.274 | NoSig |
| FAM120A | -0.068 | 12.147 | -0.753 | 0.452354873 | 0.527569958 | -6.275 | NoSig |
| INPP5A  | 0.058  | 9.046  | 0.744  | 0.457893832 | 0.533611386 | -6.282 | NoSig |
| CTNND2  | 0.135  | 6.614  | 0.739  | 0.460544757 | 0.536280387 | -6.285 | NoSig |
| MYCBP2  | 0.093  | 9.790  | 0.727  | 0.46801946  | 0.544557854 | -6.294 | NoSig |
| ECE2    | 0.110  | 7.481  | 0.720  | 0.472458721 | 0.549236041 | -6.299 | NoSig |
| ADAM15  | 0.165  | 7.429  | 0.719  | 0.472778839 | 0.549236041 | -6.299 | NoSig |
| TTC12   | -0.089 | 7.076  | -0.712 | 0.477270429 | 0.554021177 | -6.305 | NoSig |
| NEK1    | -0.067 | 8.315  | -0.704 | 0.482127847 | 0.559223174 | -6.310 | NoSig |
| ZNF24   | -0.051 | 10.512 | -0.703 | 0.483102812 | 0.559917289 | -6.311 | NoSig |
| PVR     | -0.055 | 8.613  | -0.692 | 0.489393379 | 0.56676632  | -6.318 | NoSig |
| ACOT11  | 0.108  | 6.911  | 0.690  | 0.490754103 | 0.567899884 | -6.319 | NoSig |
| ACSM5   | 0.113  | 7.355  | 0.689  | 0.49157514  | 0.568145552 | -6.320 | NoSig |
| TCTN1   | -0.073 | 8.520  | -0.689 | 0.491730548 | 0.568145552 | -6.321 | NoSig |
| RGS5    | 0.160  | 7.731  | 0.688  | 0.492363534 | 0.568415092 | -6.321 | NoSig |
| IFT122  | 0.069  | 8.999  | 0.687  | 0.492728348 | 0.568415092 | -6.322 | NoSig |
| TIE1    | 0.180  | 3.447  | 0.683  | 0.495169831 | 0.57078879  | -6.324 | NoSig |
| TK1     | 0.088  | 9.776  | 0.678  | 0.498452874 | 0.574128136 | -6.328 | NoSig |
| FIP1L1  | -0.109 | 8.111  | -0.674 | 0.500986816 | 0.576600151 | -6.330 | NoSig |
| NSMAF   | 0.059  | 9.564  | 0.672  | 0.5022845   | 0.577210907 | -6.332 | NoSig |
| MOB3B   | 0.071  | 8.711  | 0.672  | 0.502293823 | 0.577210907 | -6.332 | NoSig |
| MICALL2 | 0.130  | 8.062  | 0.668  | 0.504873866 | 0.579725382 | -6.334 | NoSig |
| LRP1    | 0.072  | 7.700  | 0.667  | 0.505261664 | 0.579725382 | -6.335 | NoSig |

|          |        |        |        |             |             |        |       |
|----------|--------|--------|--------|-------------|-------------|--------|-------|
| CD79B    | -0.130 | 6.527  | -0.665 | 0.507006463 | 0.581094677 | -6.337 | NoSig |
| ESRRB    | -0.105 | 3.916  | -0.664 | 0.507236645 | 0.581094677 | -6.337 | NoSig |
| RBM6     | -0.053 | 9.237  | -0.659 | 0.510792764 | 0.584451189 | -6.340 | NoSig |
| FGF22    | 0.114  | 5.956  | 0.658  | 0.51095262  | 0.584451189 | -6.341 | NoSig |
| SLC5A12  | -0.157 | 3.503  | -0.654 | 0.513736445 | 0.587183777 | -6.343 | NoSig |
| UROS     | 0.064  | 8.765  | 0.651  | 0.515769444 | 0.588923463 | -6.345 | NoSig |
| C19orf66 | 0.084  | 9.439  | 0.650  | 0.516279502 | 0.588923463 | -6.346 | NoSig |
| GYPE     | 0.138  | 4.072  | 0.650  | 0.516446668 | 0.588923463 | -6.346 | NoSig |
| APH1A    | -0.075 | 10.656 | -0.646 | 0.518693806 | 0.591032712 | -6.348 | NoSig |
| C1QTNF3  | 0.072  | 7.563  | 0.639  | 0.523605509 | 0.596172582 | -6.353 | NoSig |
| WDR62    | -0.083 | 7.124  | -0.634 | 0.526511126 | 0.599022222 | -6.356 | NoSig |
| ZNF33B   | 0.076  | 7.936  | 0.624  | 0.533569972 | 0.606589104 | -6.363 | NoSig |
| CDH19    | 0.155  | 6.271  | 0.620  | 0.535957471 | 0.608420819 | -6.365 | NoSig |
| ZHX2     | -0.091 | 8.796  | -0.620 | 0.535999511 | 0.608420819 | -6.365 | NoSig |
| KAZALD1  | -0.118 | 6.377  | -0.610 | 0.542290969 | 0.615009439 | -6.371 | NoSig |
| SCEL     | 0.164  | 3.691  | 0.610  | 0.542631059 | 0.615009439 | -6.371 | NoSig |
| ADAMTS20 | -0.101 | 5.952  | -0.592 | 0.554380664 | 0.627847713 | -6.381 | NoSig |
| CNR1     | -0.101 | 6.353  | -0.589 | 0.556417103 | 0.629674454 | -6.383 | NoSig |
| BRS3     | 0.118  | 6.605  | 0.586  | 0.558552055 | 0.631609814 | -6.385 | NoSig |
| LILRA5   | -0.089 | 7.160  | -0.582 | 0.561110691 | 0.634020971 | -6.387 | NoSig |
| GABRA2   | 0.102  | 5.519  | 0.576  | 0.564918365 | 0.637838731 | -6.390 | NoSig |
| C3orf52  | -0.098 | 6.628  | -0.574 | 0.566433555 | 0.639064261 | -6.392 | NoSig |
| GNG4     | 0.094  | 8.324  | 0.566  | 0.572200715 | 0.644431583 | -6.396 | NoSig |
| RGR      | 0.123  | 6.436  | 0.565  | 0.57245939  | 0.644431583 | -6.397 | NoSig |
| NT5E     | 0.137  | 6.726  | 0.565  | 0.572491003 | 0.644431583 | -6.397 | NoSig |
| RBM14    | -0.093 | 8.651  | -0.564 | 0.573429875 | 0.64500017  | -6.397 | NoSig |
| SLC4A1   | -0.160 | 6.925  | -0.562 | 0.574399104 | 0.645602017 | -6.398 | NoSig |
| TUBGCP3  | -0.139 | 7.639  | -0.561 | 0.575205571 | 0.646020154 | -6.399 | NoSig |
| PTPLA    | -0.126 | 7.541  | -0.559 | 0.576976115 | 0.64751961  | -6.400 | NoSig |
| GPR182   | -0.082 | 7.741  | -0.552 | 0.58128702  | 0.65186561  | -6.404 | NoSig |
| MYL12A   | 0.053  | 11.189 | 0.549  | 0.583693748 | 0.654071291 | -6.406 | NoSig |
| ARVCF    | -0.074 | 8.453  | -0.546 | 0.585316737 | 0.655396076 | -6.407 | NoSig |
| ZNF787   | 0.110  | 5.780  | 0.544  | 0.587002884 | 0.656789532 | -6.408 | NoSig |
| TRDN     | -0.122 | 3.184  | -0.537 | 0.591635833 | 0.661475552 | -6.412 | NoSig |
| NTRK3    | 0.085  | 8.549  | 0.535  | 0.592901474 | 0.662392556 | -6.413 | NoSig |
| ZKSCAN1  | -0.083 | 9.326  | -0.530 | 0.596360979 | 0.665105317 | -6.415 | NoSig |
| INPP4B   | 0.091  | 6.407  | 0.530  | 0.596658305 | 0.665105317 | -6.416 | NoSig |
| RALGAPA1 | -0.092 | 8.103  | -0.530 | 0.596671481 | 0.665105317 | -6.416 | NoSig |
| MYT1     | 0.125  | 7.450  | 0.528  | 0.598215824 | 0.666327289 | -6.417 | NoSig |
| HSPA4L   | -0.076 | 7.320  | -0.516 | 0.606378793 | 0.674914121 | -6.423 | NoSig |
| FRYL     | 0.054  | 9.625  | 0.512  | 0.609282834 | 0.677639172 | -6.425 | NoSig |
| SF1      | -0.037 | 10.409 | -0.508 | 0.612167887 | 0.680339049 | -6.427 | NoSig |
| PRKAA1   | -0.100 | 6.444  | -0.504 | 0.614614341 | 0.682547816 | -6.429 | NoSig |
| SORBS2   | 0.134  | 8.350  | 0.503  | 0.615701101 | 0.683244431 | -6.429 | NoSig |
| ALOX15B  | -0.093 | 7.475  | -0.501 | 0.616627193 | 0.683761847 | -6.430 | NoSig |

|              |        |        |        |             |             |        |       |
|--------------|--------|--------|--------|-------------|-------------|--------|-------|
| DNASE1L3     | -0.056 | 7.032  | -0.499 | 0.618271388 | 0.685074184 | -6.431 | NoSig |
| NRP2         | -0.050 | 8.098  | -0.498 | 0.618837957 | 0.685191394 | -6.432 | NoSig |
| HEATR3       | 0.066  | 7.917  | 0.493  | 0.62267878  | 0.688931061 | -6.434 | NoSig |
| MPHOSPH6     | 0.056  | 10.142 | 0.492  | 0.623322446 | 0.689130466 | -6.435 | NoSig |
| IQCA1        | 0.067  | 7.525  | 0.489  | 0.625093491 | 0.690575053 | -6.436 | NoSig |
| DNM2         | 0.056  | 8.242  | 0.488  | 0.626352149 | 0.691004213 | -6.437 | NoSig |
| ITGA1        | -0.147 | 4.572  | -0.487 | 0.626411351 | 0.691004213 | -6.437 | NoSig |
| SEMA6A       | -0.041 | 7.921  | -0.485 | 0.628306835 | 0.692444925 | -6.438 | NoSig |
| NLRP1        | 0.077  | 6.800  | 0.484  | 0.628648722 | 0.692444925 | -6.438 | NoSig |
| SLC22A7      | -0.083 | 6.208  | -0.481 | 0.630710188 | 0.694201369 | -6.440 | NoSig |
| IRF6         | -0.057 | 10.533 | -0.477 | 0.633877707 | 0.697171708 | -6.442 | NoSig |
| COL9A1       | -0.094 | 4.733  | -0.476 | 0.634548289 | 0.697393426 | -6.442 | NoSig |
| KLHL4        | -0.072 | 6.654  | -0.468 | 0.639971261 | 0.702354738 | -6.446 | NoSig |
| STK38        | 0.042  | 10.208 | 0.468  | 0.640007175 | 0.702354738 | -6.446 | NoSig |
| SLC23A2      | -0.031 | 7.715  | -0.467 | 0.640809482 | 0.702716593 | -6.446 | NoSig |
| SIK3         | 0.030  | 8.733  | 0.466  | 0.641807842 | 0.703292749 | -6.447 | NoSig |
| ANKFY1       | -0.033 | 8.342  | -0.464 | 0.643082267 | 0.704170346 | -6.448 | NoSig |
| PTGIR        | -0.075 | 5.987  | -0.461 | 0.645088088 | 0.705846937 | -6.449 | NoSig |
| GRM5         | -0.092 | 5.457  | -0.459 | 0.646770578 | 0.707167537 | -6.450 | NoSig |
| CDC25A       | 0.076  | 6.410  | 0.453  | 0.651351565 | 0.711653033 | -6.453 | NoSig |
| KDM6B        | -0.076 | 9.638  | -0.435 | 0.663895167 | 0.72482534  | -6.461 | NoSig |
| DRP2         | 0.091  | 7.456  | 0.433  | 0.665675553 | 0.726235912 | -6.462 | NoSig |
| CDKL3        | 0.082  | 6.465  | 0.428  | 0.668818396 | 0.729129733 | -6.463 | NoSig |
| ALDH3B1      | 0.062  | 7.933  | 0.424  | 0.671764467 | 0.731804954 | -6.465 | NoSig |
| MOG          | 0.079  | 6.683  | 0.419  | 0.675607603 | 0.734976765 | -6.467 | NoSig |
| SLAMF1       | 0.049  | 7.805  | 0.419  | 0.675664585 | 0.734976765 | -6.467 | NoSig |
| CDKN3        | 0.038  | 9.511  | 0.418  | 0.676511043 | 0.735359591 | -6.468 | NoSig |
| LOC100506469 | -0.053 | 9.041  | -0.414 | 0.679069552 | 0.737601478 | -6.469 | NoSig |
| BTG4         | -0.071 | 4.207  | -0.412 | 0.68075553  | 0.738893046 | -6.470 | NoSig |
| TNXB         | -0.056 | 7.049  | -0.409 | 0.682701582 | 0.740464809 | -6.471 | NoSig |
| RALGPS1      | -0.057 | 6.325  | -0.407 | 0.684418626 | 0.741786076 | -6.472 | NoSig |
| FBXW2        | 0.037  | 9.043  | 0.404  | 0.686615329 | 0.743624905 | -6.473 | NoSig |
| GCLC         | 0.044  | 8.776  | 0.402  | 0.688090287 | 0.744679954 | -6.474 | NoSig |
| CTNNA1       | 0.037  | 11.394 | 0.401  | 0.688979151 | 0.744679999 | -6.475 | NoSig |
| STEAP3       | -0.037 | 9.892  | -0.401 | 0.689091916 | 0.744679999 | -6.475 | NoSig |
| TACC1        | -0.048 | 10.513 | -0.400 | 0.689763756 | 0.74486471  | -6.475 | NoSig |
| NLGN4Y       | -0.085 | 4.778  | -0.395 | 0.693069318 | 0.747891202 | -6.477 | NoSig |
| CNPY3        | -0.082 | 7.960  | -0.390 | 0.697087404 | 0.751681631 | -6.479 | NoSig |
| TTLL5        | -0.030 | 8.637  | -0.380 | 0.704470003 | 0.759091953 | -6.483 | NoSig |
| SLC1A6       | 0.059  | 5.041  | 0.378  | 0.705830811 | 0.760007542 | -6.483 | NoSig |
| NOL9         | -0.027 | 9.661  | -0.374 | 0.708443433 | 0.76221999  | -6.485 | NoSig |
| ATP6V0A2     | -0.046 | 7.219  | -0.374 | 0.708910724 | 0.76221999  | -6.485 | NoSig |
| SERPINB6     | -0.041 | 9.941  | -0.369 | 0.712233099 | 0.765238887 | -6.487 | NoSig |
| CASP8        | 0.048  | 8.653  | 0.367  | 0.714207517 | 0.766266709 | -6.488 | NoSig |
| TTC26        | 0.062  | 6.468  | 0.367  | 0.714220349 | 0.766266709 | -6.488 | NoSig |

|           |        |        |        |             |             |        |       |
|-----------|--------|--------|--------|-------------|-------------|--------|-------|
| TPCN1     | 0.030  | 9.352  | 0.362  | 0.717481411 | 0.769210424 | -6.489 | NoSig |
| EHBP1L1   | -0.045 | 7.894  | -0.361 | 0.718257283 | 0.769399735 | -6.490 | NoSig |
| MINA      | -0.032 | 9.224  | -0.361 | 0.718692825 | 0.769399735 | -6.490 | NoSig |
| GABRG3    | 0.056  | 6.102  | 0.358  | 0.720603802 | 0.770890542 | -6.491 | NoSig |
| PIP4K2B   | -0.025 | 9.003  | -0.353 | 0.724430382 | 0.774427016 | -6.492 | NoSig |
| CYP19A1   | 0.082  | 6.204  | 0.350  | 0.726664191 | 0.776256933 | -6.493 | NoSig |
| ASTN2     | -0.058 | 6.307  | -0.347 | 0.729075001 | 0.778273171 | -6.495 | NoSig |
| RGS11     | 0.057  | 5.889  | 0.339  | 0.734590101 | 0.783099472 | -6.497 | NoSig |
| ZBTB40    | 0.040  | 8.752  | 0.339  | 0.734649471 | 0.783099472 | -6.497 | NoSig |
| MYH11     | -0.068 | 6.217  | -0.335 | 0.737949402 | 0.786053553 | -6.499 | NoSig |
| PDK4      | 0.069  | 6.068  | 0.333  | 0.739348631 | 0.786980254 | -6.499 | NoSig |
| BLZF1     | -0.065 | 6.366  | -0.332 | 0.74014644  | 0.78726592  | -6.499 | NoSig |
| SHANK2    | 0.050  | 8.358  | 0.329  | 0.742739779 | 0.78945965  | -6.501 | NoSig |
| BNC1      | 0.062  | 6.472  | 0.326  | 0.744527499 | 0.790794565 | -6.501 | NoSig |
| GVINP1    | -0.040 | 8.106  | -0.321 | 0.748245274 | 0.794176104 | -6.503 | NoSig |
| EIF2B5    | 0.023  | 9.290  | 0.320  | 0.749552841 | 0.794996487 | -6.503 | NoSig |
| UBE2O     | -0.063 | 6.645  | -0.316 | 0.752592147 | 0.797651121 | -6.505 | NoSig |
| DNAJB9    | -0.024 | 10.294 | -0.312 | 0.755047556 | 0.799683559 | -6.506 | NoSig |
| CYP2A6    | 0.068  | 8.444  | 0.308  | 0.75836161  | 0.80262186  | -6.507 | NoSig |
| TBC1D16   | -0.037 | 9.071  | -0.302 | 0.762827404 | 0.806774075 | -6.509 | NoSig |
| SFXN3     | 0.029  | 8.190  | 0.296  | 0.767404909 | 0.810499552 | -6.511 | NoSig |
| ECM2      | 0.036  | 7.689  | 0.296  | 0.76744006  | 0.810499552 | -6.511 | NoSig |
| C14orf159 | 0.039  | 8.034  | 0.294  | 0.769172648 | 0.811752823 | -6.511 | NoSig |
| FOXN1     | 0.029  | 3.992  | 0.293  | 0.769737937 | 0.811773271 | -6.511 | NoSig |
| CEL       | -0.065 | 4.429  | -0.289 | 0.772929025 | 0.814409843 | -6.513 | NoSig |
| PIEZO2    | -0.040 | 7.521  | -0.288 | 0.773333355 | 0.814409843 | -6.513 | NoSig |
| CHD1L     | -0.029 | 10.597 | -0.285 | 0.775620791 | 0.816240705 | -6.514 | NoSig |
| KLF11     | -0.026 | 8.666  | -0.275 | 0.783321554 | 0.823761776 | -6.516 | NoSig |
| MTHFD2L   | -0.048 | 6.234  | -0.274 | 0.784542974 | 0.824463182 | -6.517 | NoSig |
| PGPEP1    | -0.019 | 8.525  | -0.270 | 0.787503017 | 0.826989397 | -6.518 | NoSig |
| STRADA    | -0.031 | 10.005 | -0.268 | 0.78875638  | 0.827535633 | -6.518 | NoSig |
| ARSB      | -0.032 | 7.236  | -0.268 | 0.789136199 | 0.827535633 | -6.518 | NoSig |
| SLC4A5    | 0.035  | 6.975  | 0.260  | 0.794737573 | 0.832464529 | -6.520 | NoSig |
| FUT8      | 0.068  | 7.342  | 0.260  | 0.79495604  | 0.832464529 | -6.520 | NoSig |
| KLHL3     | 0.037  | 7.204  | 0.255  | 0.798874901 | 0.835979576 | -6.522 | NoSig |
| ANO1      | 0.059  | 7.148  | 0.253  | 0.800558196 | 0.837151925 | -6.522 | NoSig |
| EML4      | 0.025  | 8.696  | 0.252  | 0.801328501 | 0.837368574 | -6.523 | NoSig |
| RPE       | -0.032 | 7.898  | -0.250 | 0.803113954 | 0.838644979 | -6.523 | NoSig |
| NCALD     | -0.043 | 8.777  | -0.249 | 0.803756876 | 0.83872735  | -6.523 | NoSig |
| ITGAX     | 0.053  | 5.969  | 0.246  | 0.805856733 | 0.840328866 | -6.524 | NoSig |
| TGIF1     | -0.023 | 9.232  | -0.245 | 0.806882186 | 0.840808557 | -6.524 | NoSig |
| SSH1      | 0.016  | 9.183  | 0.243  | 0.80811782  | 0.841506442 | -6.525 | NoSig |
| GIGYF2    | -0.016 | 9.578  | -0.242 | 0.808867412 | 0.841656613 | -6.525 | NoSig |
| DYNC2LI1  | 0.031  | 7.287  | 0.241  | 0.809394053 | 0.841656613 | -6.525 | NoSig |
| SYN1      | -0.053 | 6.173  | -0.238 | 0.812105539 | 0.843886049 | -6.526 | NoSig |



|            |        |        |        |             |             |        |       |
|------------|--------|--------|--------|-------------|-------------|--------|-------|
| TRAPPC2    | 0.023  | 8.094  | 0.228  | 0.819672093 | 0.851153912 | -6.528 | NoSig |
| ENTPD4     | 0.027  | 9.088  | 0.227  | 0.820492822 | 0.851411603 | -6.528 | NoSig |
| UGGT2      | -0.034 | 8.079  | -0.225 | 0.821835591 | 0.852210267 | -6.529 | NoSig |
| CDC42BPB   | -0.052 | 7.264  | -0.223 | 0.823901583 | 0.853645527 | -6.529 | NoSig |
| MCM3AP.AS1 | -0.025 | 7.396  | -0.222 | 0.824367839 | 0.853645527 | -6.529 | NoSig |
| TIPRL      | -0.032 | 9.411  | -0.212 | 0.831926044 | 0.86087267  | -6.532 | NoSig |
| RECQL5     | 0.025  | 7.111  | 0.200  | 0.841715879 | 0.870397435 | -6.534 | NoSig |
| ZNF611     | -0.025 | 9.513  | -0.196 | 0.844973676 | 0.873159038 | -6.535 | NoSig |
| TSC22D4    | -0.017 | 7.848  | -0.189 | 0.850429119 | 0.878186181 | -6.536 | NoSig |
| PHF21A     | -0.029 | 8.159  | -0.182 | 0.855905606 | 0.883228061 | -6.537 | NoSig |
| FBXO9      | -0.013 | 11.103 | -0.173 | 0.862826865 | 0.889752807 | -6.539 | NoSig |
| GATA4      | -0.032 | 4.913  | -0.168 | 0.866909106 | 0.893342925 | -6.540 | NoSig |
| CADPS      | 0.026  | 6.159  | 0.163  | 0.870369998 | 0.896288218 | -6.541 | NoSig |
| THSD4      | 0.025  | 6.868  | 0.162  | 0.871304948 | 0.896630074 | -6.541 | NoSig |
| DNAJC3     | 0.026  | 7.804  | 0.156  | 0.876193223 | 0.901036876 | -6.542 | NoSig |
| WFS1       | -0.012 | 9.213  | -0.154 | 0.87812847  | 0.902402927 | -6.542 | NoSig |
| GYPA       | 0.028  | 5.196  | 0.144  | 0.88584918  | 0.909708378 | -6.544 | NoSig |
| CEP112     | 0.020  | 6.445  | 0.142  | 0.887398756 | 0.910670773 | -6.544 | NoSig |
| SLC36A1    | 0.021  | 7.891  | 0.132  | 0.895019818 | 0.917858255 | -6.545 | NoSig |
| ITIH5      | 0.021  | 7.527  | 0.130  | 0.896665779 | 0.918912483 | -6.545 | NoSig |
| DNAH17     | -0.019 | 6.885  | -0.128 | 0.898007825 | 0.919654019 | -6.546 | NoSig |
| BCL2L14    | 0.019  | 8.561  | 0.126  | 0.899987754 | 0.921047344 | -6.546 | NoSig |
| RPS6KA2    | -0.010 | 8.696  | -0.118 | 0.905862525 | 0.926421991 | -6.547 | NoSig |
| STAU2      | -0.010 | 8.266  | -0.117 | 0.906619894 | 0.926559301 | -6.547 | NoSig |
| ZAK        | -0.014 | 7.444  | -0.116 | 0.907866844 | 0.926821338 | -6.547 | NoSig |
| LMO3       | -0.022 | 7.889  | -0.116 | 0.908122858 | 0.926821338 | -6.547 | NoSig |
| INTS6      | 0.016  | 8.430  | 0.114  | 0.9094968   | 0.927129478 | -6.547 | NoSig |
| ALPL       | -0.016 | 6.869  | -0.114 | 0.90967176  | 0.927129478 | -6.547 | NoSig |
| KLHL18     | -0.009 | 9.015  | -0.111 | 0.911422996 | 0.928278079 | -6.548 | NoSig |
| VPS13D     | -0.007 | 8.738  | -0.106 | 0.915710533 | 0.931434311 | -6.548 | NoSig |
| DR1        | -0.009 | 9.644  | -0.106 | 0.915774689 | 0.931434311 | -6.548 | NoSig |
| MAP3K13    | -0.022 | 6.135  | -0.099 | 0.921529044 | 0.936646404 | -6.549 | NoSig |
| SMOX       | 0.015  | 8.078  | 0.096  | 0.923560752 | 0.938070245 | -6.549 | NoSig |
| PRO2949    | 0.017  | 6.443  | 0.092  | 0.92688525  | 0.940328355 | -6.550 | NoSig |
| HTR6       | -0.019 | 7.299  | -0.092 | 0.927048667 | 0.940328355 | -6.550 | NoSig |
| USP36      | -0.015 | 6.898  | -0.090 | 0.928559059 | 0.941218351 | -6.550 | NoSig |
| FABP6      | -0.017 | 3.507  | -0.081 | 0.93574506  | 0.947856202 | -6.551 | NoSig |
| PTGFR      | -0.021 | 4.512  | -0.079 | 0.937085988 | 0.948568322 | -6.551 | NoSig |
| TERF2      | 0.007  | 9.292  | 0.073  | 0.941817571 | 0.952709338 | -6.551 | NoSig |
| CCDC40     | 0.010  | 7.392  | 0.072  | 0.942779441 | 0.95303401  | -6.551 | NoSig |
| EHD4       | 0.004  | 9.134  | 0.058  | 0.953697079 | 0.96341546  | -6.552 | NoSig |
| ENAH       | 0.007  | 10.634 | 0.056  | 0.955736595 | 0.96482031  | -6.552 | NoSig |
| CANT1      | -0.006 | 9.540  | -0.050 | 0.95983295  | 0.968298233 | -6.553 | NoSig |
| RNFT2      | -0.010 | 6.241  | -0.047 | 0.962365278 | 0.970194691 | -6.553 | NoSig |
| PPM1F      | -0.004 | 8.946  | -0.044 | 0.964692982 | 0.971882428 | -6.553 | NoSig |

|         |        |        |        |             |             |        |       |
|---------|--------|--------|--------|-------------|-------------|--------|-------|
| CD74    | -0.006 | 12.643 | -0.035 | 0.971961647 | 0.978542294 | -6.553 | NoSig |
| SIM2    | -0.006 | 7.406  | -0.030 | 0.976033112 | 0.98197648  | -6.553 | NoSig |
| ITFG1   | 0.002  | 9.535  | 0.024  | 0.980792302 | 0.986097467 | -6.553 | NoSig |
| ARMCX5  | -0.003 | 7.907  | -0.023 | 0.981766919 | 0.986410411 | -6.554 | NoSig |
| NBEAL2  | 0.003  | 8.018  | 0.022  | 0.982434228 | 0.98641438  | -6.554 | NoSig |
| CLDN15  | -0.002 | 7.198  | -0.013 | 0.989373863 | 0.992711832 | -6.554 | NoSig |
| ZNF446  | -0.002 | 6.671  | -0.010 | 0.991749425 | 0.994178218 | -6.554 | NoSig |
| PDSS2   | 0.001  | 7.783  | 0.009  | 0.992733583 | 0.994178218 | -6.554 | NoSig |
| CYP39A1 | -0.002 | 5.844  | -0.009 | 0.992841058 | 0.994178218 | -6.554 | NoSig |
| FRMD8   | 0.001  | 6.186  | 0.007  | 0.994544355 | 0.995213631 | -6.554 | NoSig |
| ARID5B  | 0.000  | 10.360 | -0.002 | 0.998593909 | 0.998593909 | -6.554 | NoSig |
| AFF4    | -1.053 | 7.506  | -6.797 | 9.79E-11    | 1.12E-08    | 14.059 | Down  |
| FGD2    | -1.381 | 7.705  | -6.591 | 3.15E-10    | 2.56E-08    | 12.935 | Down  |
| MYO16   | -1.027 | 4.434  | -6.584 | 3.27E-10    | 2.56E-08    | 12.899 | Down  |
| GLS2    | -1.017 | 6.120  | -6.495 | 5.41E-10    | 3.82E-08    | 12.417 | Down  |
| CCDC132 | -1.418 | 6.484  | -6.487 | 5.65E-10    | 3.82E-08    | 12.375 | Down  |
| MORN1   | -1.310 | 4.596  | -6.381 | 1.02E-09    | 5.81E-08    | 11.814 | Down  |
| ARMCX4  | -1.121 | 4.664  | -6.160 | 3.38E-09    | 1.54E-07    | 10.660 | Down  |
| CHD2    | -1.283 | 7.892  | -6.078 | 5.28E-09    | 1.91E-07    | 10.235 | Down  |
| FHL5    | -1.254 | 5.607  | -6.039 | 6.49E-09    | 2.19E-07    | 10.037 | Down  |
| NAV3    | -1.133 | 5.719  | -6.016 | 7.32E-09    | 2.37E-07    | 9.922  | Down  |
| PPIL6   | -1.089 | 4.746  | -5.960 | 9.84E-09    | 2.81E-07    | 9.639  | Down  |
| ATP8B3  | -1.168 | 4.788  | -5.464 | 1.25E-07    | 2.02E-06    | 7.213  | Down  |
| TPM4    | -1.257 | 11.394 | -5.302 | 2.77E-07    | 3.64E-06    | 6.457  | Down  |
| DNASE1  | -1.405 | 4.078  | -5.267 | 3.28E-07    | 4.14E-06    | 6.295  | Down  |
| UBE2G2  | -1.112 | 9.845  | -5.162 | 5.42E-07    | 6.15E-06    | 5.820  | Down  |
| RAD54L2 | -1.108 | 6.080  | -5.155 | 5.60E-07    | 6.22E-06    | 5.788  | Down  |
| GPR37L1 | -1.159 | 4.797  | -5.155 | 5.60E-07    | 6.22E-06    | 5.788  | Down  |
| FLCN    | -1.114 | 7.364  | -5.108 | 7.01E-07    | 7.19E-06    | 5.575  | Down  |
| C7orf63 | -1.201 | 5.686  | -5.081 | 7.97E-07    | 7.95E-06    | 5.454  | Down  |
| RPAIN   | -1.036 | 7.100  | -4.974 | 1.32E-06    | 1.21E-05    | 4.977  | Down  |
| LUZP1   | -1.062 | 8.182  | -4.923 | 1.67E-06    | 1.45E-05    | 4.753  | Down  |
| COCH    | -1.453 | 8.151  | -4.904 | 1.82E-06    | 1.54E-05    | 4.672  | Down  |
| MUC6    | -1.466 | 6.272  | -4.903 | 1.83E-06    | 1.54E-05    | 4.667  | Down  |
| BPNT1   | -1.234 | 6.208  | -4.869 | 2.14E-06    | 1.78E-05    | 4.519  | Down  |
| OTUD7B  | -1.245 | 4.454  | -4.737 | 3.88E-06    | 2.94E-05    | 3.956  | Down  |
| EPB41   | -1.502 | 4.948  | -4.643 | 5.87E-06    | 4.20E-05    | 3.565  | Down  |
| MCPH1   | -1.045 | 4.018  | -4.423 | 1.52E-05    | 9.17E-05    | 2.668  | Down  |
| SLC12A1 | -1.195 | 4.894  | -4.358 | 2.01E-05    | 0.000115015 | 2.408  | Down  |
| FAM13C  | -1.347 | 3.575  | -4.345 | 2.12E-05    | 0.000120093 | 2.356  | Down  |
| ZBTB44  | -1.269 | 5.710  | -4.208 | 3.74E-05    | 0.00019188  | 1.826  | Down  |
| ZNF81   | -1.057 | 5.954  | -4.202 | 3.84E-05    | 0.000194878 | 1.802  | Down  |
| PDE12   | -1.085 | 6.481  | -4.106 | 5.66E-05    | 0.000271389 | 1.440  | Down  |
| ETV3    | -1.192 | 4.816  | -4.104 | 5.71E-05    | 0.000273027 | 1.431  | Down  |
| ERICH1  | -1.234 | 5.000  | -4.082 | 6.23E-05    | 0.00029209  | 1.350  | Down  |

|            |        |       |        |             |             |        |      |
|------------|--------|-------|--------|-------------|-------------|--------|------|
| DDX51      | -1.016 | 4.967 | -3.969 | 9.75E-05    | 0.000427768 | 0.932  | Down |
| AFF3       | -1.080 | 4.198 | -3.933 | 0.000112387 | 0.000480227 | 0.800  | Down |
| BTBD7      | -1.084 | 5.881 | -3.880 | 0.000137992 | 0.000566835 | 0.610  | Down |
| PDE5A      | -1.047 | 5.039 | -3.782 | 0.000200329 | 0.000775754 | 0.264  | Down |
| MTSS1L     | -1.064 | 4.458 | -3.344 | 0.000969035 | 0.002995813 | -1.186 | Down |
| EXOSC1     | -1.000 | 5.335 | -3.290 | 0.001167594 | 0.00352173  | -1.356 | Down |
| ANKRD36BP2 | -1.232 | 3.634 | -2.979 | 0.003212245 | 0.008184387 | -2.272 | Down |
